# Supplementary material
Source: PubMed Central journal article supplement (PMC3676070)
Supplement: JB.00140-13_zjb999092590so2.pdf [file JB.00140-13_zjb999092590so2.pdf]

**Table S1. Distribution of orthologs of B.subtilis Transcriptional Factors in other Bacillales genomes**

| TF name | <i>Bacillus subtilis</i> sstr. 168 | <i>Bacillus amyloquelificans</i> FZB42 | <i>Bacillus pumilus</i> SAFR-032 | <i>Bacillus licheniformis</i> DSM 13 | <i>Anoxybacillus flavithermus</i> WK1 | <i>Geobacillus kaustophilus</i> HTA426 | <i>Bacillus cereus</i> ATCC 14579 | <i>Bacillus halodurans</i> C-125 | <i>Bacillus clausii</i> KSM-K16 | <i>Oceanobacillus iheyensis</i> HTE831 | <i>Paenibacillus</i> sp. JDR-2 | Biological process                          | Family |
|---------|------------------------------------|----------------------------------------|----------------------------------|--------------------------------------|---------------------------------------|----------------------------------------|-----------------------------------|----------------------------------|---------------------------------|----------------------------------------|--------------------------------|---------------------------------------------|--------|
| AcoR    | BSU08100                           | RBAM_008340                            | BPUM_0455                        | Bli00853                             | -                                     | -                                      | BC2766                            | BH1826                           | -                               | -                                      | -                              | Acetoin utilization                         | Fis    |
| AdaA    | BSU01810                           | RBAM_037970                            | -                                | Bli02836                             | -                                     | -                                      | BC3740                            | BH0394                           | ABC3153                         | -                                      | Pjdr2_5363                     | Adaptative response to DNA alkylation       | AraC   |
| AlsR    | BSU36020                           | RBAM_033180                            | BPUM_3270                        | Bli03849                             | -                                     | -                                      | BC3668                            | -                                | -                               | -                                      | -                              | Acetoin production                          | LysR   |
| AnsR    | BSU23590                           | RBAM_021720                            | BPUM_3549                        | Bli04141                             | -                                     | -                                      | BC3095                            | -                                | -                               | -                                      | -                              | Asparagine degradation                      | Xre    |
| AraR    | BSU33970                           | RBAM_031330                            | BPUM_2330                        | Bli02061                             | Aflv_0528                             | GK1907                                 | -                                 | BH1875                           | -                               | OB2800                                 | Pjdr2_4208                     | Arabinose utilization                       | GntR   |
| ArgR    | BSU24250                           | RBAM_022580                            | BPUM_2157                        | Bli02596                             | Aflv_0950                             | GK2390                                 | BC4174                            | BH2777                           | ABC2460                         | OB1875                                 | Pjdr2_2315                     | Arginine biosynthesis; Arginine degradation | ArgR   |
| ArsR    | BSU25810                           | -                                      | -                                | -                                    | -                                     | -                                      | BC3155                            | BH2996                           | ABC0832                         | OB0325                                 | -                              | Arsenic resistance                          | ArsR   |
| AseR    | BSU05330                           | RBAM_035850                            | -                                | Bli02124                             | Aflv_1412                             | GK0587                                 | -                                 | BH3000                           | ABC0835                         | OB2425                                 | -                              | Arsenic resistance                          | ArsR   |
| BceR    | BSU30400                           | RBAM_027330                            | BPUM_2592                        | Bli04213                             | -                                     | GK2340                                 | -                                 | BH3911                           | -                               | OB0831                                 | -                              | Bacitracin resistance                       | OmpR   |
| BglR    | BSU40130                           | RBAM_019370                            | BPUM_3663                        | -                                    | -                                     | -                                      | -                                 | -                                | -                               | -                                      | -                              | Beta-glucosides utilization                 | GntR   |
| BirA    | BSU22440                           | RBAM_020590                            | BPUM_1975                        | Bli02379                             | Aflv_1125                             | GK2180                                 | BC1537                            | BH1685                           | ABC2068                         | OB1764                                 | Pjdr2_2444                     | Biotin biosynthesis                         | BirA   |
| BkdR    | BSU24100                           | RBAM_022380                            | BPUM_2149                        | Bli02587                             | Aflv_0957                             | GK2383                                 | BC4165                            | BH2766                           | ABC2454                         | OB1870                                 | -                              | Isoleucine utilization; Valine utilization  | Fis    |
| BltR    | BSU26580                           | RBAM_006050                            | BPUM_1818                        | -                                    | -                                     | -                                      | -                                 | BH4046                           | -                               | -                                      | -                              | Multidrug resistance                        | MerR   |
| BmrR    | BSU24020                           | -                                      | -                                | Bli02784                             | -                                     | -                                      | -                                 | -                                | -                               | -                                      | -                              | Multidrug resistance                        | MerR   |
| BsdA    | BSU03620                           | RBAM_003790                            | -                                | Bli00425                             | -                                     | -                                      | -                                 | -                                | -                               | -                                      | -                              | Salicylic acid resistance                   | LysR   |
| Btr     | BSU01640                           | RBAM_002130                            | BPUM_3700                        | Bli03907                             | -                                     | -                                      | -                                 | -                                | ABC3488                         | -                                      | -                              | Iron metabolism                             | AraC   |
| CatR    | BSU33680                           | RBAM_030960                            | BPUM_3039                        | Bli00860                             | -                                     | -                                      | BC3389                            | BH3303                           | -                               | OB3043                                 | Pjdr2_1364                     | Oxidative stress response                   | HxlR   |
| CcpA    | BSU29740                           | RBAM_026860                            | BPUM_2620                        | Bli03125                             | Aflv_0458                             | GK2810                                 | BC4672                            | BH3241                           | ABC2764                         | OB2226                                 | Pjdr2_3800                     | Carbon catabolism                           | LacI   |
| CcpB    | BSU40870                           | RBAM_037940                            | -                                | -                                    | -                                     | -                                      | -                                 | -                                | -                               | -                                      | -                              | Carbon catabolism                           | LacI   |
| CcpC    | BSU14140                           | RBAM_013910                            | BPUM_1310                        | Bli01628                             | -                                     | -                                      | BC3982                            | -                                | -                               | OB1497                                 | -                              | Citrate metabolism                          | LysR   |
| CcpN    | BSU25250                           | RBAM_023550                            | BPUM_2257                        | Bli02716                             | Aflv_0853                             | GK2485                                 | BC4294                            | BH1372                           | ABC1686                         | OB1947                                 | -                              | Gluconeogenesis                             | CcpN   |
| CggR    | BSU33950                           | RBAM_031310                            | BPUM_3058                        | Bli03666                             | Aflv_2519                             | GK3059                                 | BC5141                            | BH3561                           | ABC3022                         | OB2439                                 | Pjdr2_0176                     | Glycolysis                                  | SorC   |
| CitR    | BSU09430                           | RBAM_009690                            | -                                | Bli01009                             | -                                     | -                                      | -                                 | -                                | ABC4042                         | -                                      | -                              | Citrate metabolism                          | LysR   |

|             |          |             |           |          |           |        |        |        |         |         |            |   |                                                    |      |
|-------------|----------|-------------|-----------|----------|-----------|--------|--------|--------|---------|---------|------------|---|----------------------------------------------------|------|
| <b>CitT</b> | BSU07590 | RBAM_007790 | BPUM_0708 | Bli00224 | -         | -      | BC0561 | BH3838 | ABC1012 | ABC0666 | OB3250     | - | Citrate utilization                                | CitB |
| <b>CodY</b> | BSU16170 | RBAM_016000 | BPUM_1515 | Bli01837 | Aflv_1745 | GK1215 | BC3826 | BH2462 | ABC2273 | OB1551  | Pjdr2_3461 | - | Amino acid metabolism                              | CodY |
| <b>ComA</b> | BSU31680 | RBAM_028760 | BPUM_2837 | Bli03353 | Aflv_0550 | -      | BC0882 | -      | -       | -       | Pjdr2_1033 | - | Competence                                         | LuxR |
| <b>CsoR</b> | BSU33520 | RBAM_030700 | BPUM_3023 | Bli03555 | Aflv_1217 | GK0901 | BC3732 | BH0558 | ABC2444 | OB1141  | Pjdr2_5324 | - | Copper resistance                                  | RcnR |
| <b>CssR</b> | BSU33010 | RBAM_030120 | BPUM_2953 | Bli03482 | -         | -      | -      | -      | -       | OB0584  | -          | - | Protein secretion stress                           | OmpR |
| <b>CtsR</b> | BSU00830 | RBAM_001080 | BPUM_0068 | Bli00101 | Aflv_0074 | GK0075 | BC0099 | BH0100 | ABC0118 | OB0090  | Pjdr2_5718 | - | Heat shock response                                | CtsR |
| <b>CymR</b> | BSU27520 | RBAM_024630 | BPUM_2393 | Bli02877 | Aflv_0736 | GK2565 | BC4393 | BH1259 | ABC1584 | OB2016  | Pjdr2_4358 | - | Cysteine metabolism                                | Rrf2 |
| <b>CysL</b> | BSU37650 | RBAM_034830 | BPUM_3611 | Bli01300 | Aflv_1598 | GK1408 | -      | -      | -       | OB3407  | -          | - | Sulfite reduction                                  | LysR |
| <b>CzrA</b> | BSU19120 | RBAM_018890 | BPUM_1843 | Bli02201 | Aflv_1335 | GK1406 | BC0595 | -      | ABC3390 | OB1400  | Pjdr2_1132 | - | Zinc resistance; Cadmium resistance; Copper resist | ArsR |
| <b>DctR</b> | BSU04460 | RBAM_004790 | BPUM_0418 | -        | -         | GK0558 | -      | -      | -       | -       | -          | - | C4-dicarboxylate transport                         | DeoR |
| <b>DegA</b> | BSU10840 | -           | -         | Bli01180 | -         | GK1901 | -      | BH2219 | -       | -       | Pjdr2_1954 | - | Inositol utilization                               | Lacl |
| <b>DeoR</b> | BSU39430 | RBAM_036490 | BPUM_3588 | Bli04230 | -         | -      | BC1819 | -      | -       | -       | -          | - | Deoxynucleoside utilization                        | SorC |
| <b>DesR</b> | BSU19200 | RBAM_036850 | BPUM_2590 | Bli02809 | -         | -      | -      | -      | ABC0736 | OB2850  | -          | - | Cold shock response                                | LuxR |
| <b>ExuR</b> | BSU12370 | RBAM_012400 | BPUM_2986 | Bli03514 | -         | -      | -      | -      | -       | -       | -          | - | Hexuronate utilization                             | Lacl |
| <b>FadR</b> | BSU28550 | RBAM_025610 | BPUM_2512 | Bli03002 | Aflv_0565 | GK2689 | BC4525 | BH3102 | ABC2672 | OB2121  | -          | - | Fatty acid degradation                             | TetR |
| <b>FapR</b> | BSU15880 | RBAM_015710 | BPUM_1487 | Bli01809 | Aflv_1775 | GK1187 | BC3852 | BH2494 | ABC2304 | OB1521  | Pjdr2_3495 | - | Fatty acid biosynthesis                            | FapR |
| <b>FatR</b> | BSU27170 | RBAM_024270 | BPUM_1679 | Bli02849 | -         | -      | BC2936 | -      | -       | -       | -          | - | Toxic fatty acid stress response                   | TetR |
| <b>Fnr</b>  | BSU37310 | RBAM_034460 | -         | Bli02080 | Aflv_2153 | GK0768 | BC2122 | BH0231 | -       | -       | Pjdr2_5250 | - | Anaerobic metabolism                               | FNR  |
| <b>FriR</b> | BSU32560 | RBAM_029620 | -         | -        | -         | -      | -      | -      | -       | -       | -          | - | Fructoselysine utilization                         | GntR |
| <b>FruR</b> | BSU14380 | RBAM_014120 | BPUM_1334 | Bli01652 | Aflv_1578 | GK1840 | BC3720 | BH0826 | ABC1269 | OB0840  | -          | - | Fructose utilization                               | DeoR |
| <b>Fur</b>  | BSU23520 | RBAM_021640 | BPUM_2084 | Bli02503 | Aflv_0995 | GK2317 | BC4091 | BH1527 | ABC1780 | OB1849  | Pjdr2_2329 | - | Iron homeostasis                                   | Fur  |
| <b>GabR</b> | BSU03890 | RBAM_004140 | BPUM_0361 | Bli00473 | -         | -      | -      | -      | -       | -       | -          | - | Gamma-aminobutyrate utilization                    | GntR |
| <b>GamR</b> | BSU02370 | -           | -         | Bli00336 | -         | -      | -      | BH0914 | ABC0645 | OB2272  | -          | - | Glucosamine utilization                            | GntR |
| <b>GanR</b> | BSU34170 | -           | BPUM_3612 | Bli04281 | -         | -      | -      | BH2018 | ABC3521 | -       | -          | - | Galactan utilization                               | Lacl |
| <b>GlcR</b> | BSU36300 | RBAM_033520 | -         | Bli03861 | -         | -      | -      | BH0847 | -       | OB2808  | Pjdr2_3038 | - | -                                                  | DeoR |
| <b>GlnL</b> | BSU02450 | RBAM_002820 | BPUM_3016 | Bli00276 | -         | -      | BC1743 | BH2715 | -       | -       | -          | - | Glutamine utilization; Aspartate utilization       | YcbB |
| <b>GlnR</b> | BSU17450 | RBAM_017250 | BPUM_1636 | Bli01992 | Aflv_1508 | GK1326 | BC3706 | -      | -       | OB1650  | Pjdr2_2618 | - | Nitrogen assimilation                              | MerR |
| <b>GitC</b> | BSU18460 | RBAM_018630 | BPUM_1815 | Bli02163 | Aflv_1234 | GK1430 | -      | -      | -       | -       | -          | - | Glutamate metabolism                               | LysR |
| <b>GitR</b> | BSU26670 | -           | -         | -        | -         | -      | -      | -      | -       | -       | Pjdr2_3123 | - | Glutamate metabolism                               | LysR |
| <b>GlvR</b> | BSU08190 | RBAM_008370 | -         | Bli00856 | -         | -      | -      | -      | -       | -       | -          | - | Maltose utilization                                | RpiR |
| <b>GmuR</b> | BSU05850 | RBAM_006170 | BPUM_2117 | Bli02559 | -         | GK1855 | -      | BH3917 | -       | -       | -          | - | Glucomannan utilization                            | GntR |

|             |          |             |                        |                      |           |        |                  |        |         |                  |                          |                                                  |       |
|-------------|----------|-------------|------------------------|----------------------|-----------|--------|------------------|--------|---------|------------------|--------------------------|--------------------------------------------------|-------|
| <b>GntR</b> | BSU40050 | -           | -                      | BLi04286             | -         | -      | -                | -      | -       | OB3190           | -                        | Gluconate utilization                            | GntR  |
| <b>GudR</b> | BSU02500 | -           | -                      | BLi00288             | -         | -      | -                | -      | ABC0472 | OB2842           | -                        | D-glucarate/galactarate utilization              | GntR  |
| <b>GutR</b> | BSU06140 | RBAM_006530 | -                      | -                    | -         | -      | -                | -      | -       | -                | -                        | Sorbitol utilization                             | GutR  |
| <b>HisR</b> | BSU06580 | RBAM_006980 | BPUM_0619              | BLi00713             | Aflv_0244 | GK0273 | -                | BH0639 | ABC1076 | OB0753           | Pjdr2_0880               | Histidine biosynthesis                           | TrpR  |
| <b>HrcA</b> | BSU25490 | RBAM_023790 | BPUM_2282              | BLi02741             | Aflv_0833 | GK2506 | BC4314           | BH1344 | ABC1657 | OB1970           | Pjdr2_2205               | Heat shock response                              | HrcA  |
| <b>HxlR</b> | BSU03470 | RBAM_003640 | BPUM_2334              | BLi02806             | -         | -      | -                | -      | -       | OB2805           | Pjdr2_1186               | Ribulose monophosphate pathway                   | HxlR  |
| <b>IolR</b> | BSU39770 | RBAM_036790 | -                      | BLi0452              | -         | -      | -                | -      | ABC0421 | -                | -                        | Inositol utilization                             | DeoR  |
| <b>KdgR</b> | BSU22120 | -           | BPUM_3245              | BLi03828             | -         | -      | -                | -      | -       | -                | -                        | Pectin utilization                               | LacI  |
| <b>KipR</b> | BSU04100 | RBAM_004330 | BPUM_0384              | BLi00503             | -         | GK1499 | BC3069           | BH1819 | -       | -                | -                        | Swporulation                                     | IclR  |
| <b>LevR</b> | BSU27080 | -           | -                      | BLi02832             | -         | -      | -                | -      | -       | -                | -                        | Levan utilization                                | LevR  |
| <b>LexA</b> | BSU17850 | RBAM_017650 | BPUM_1686              | BLi02032             | Aflv_1506 | GK1328 | BC3690           | BH2356 | ABC2167 | OB1669           | Pjdr2_2621<br>Pjdr2_1107 | SOS response                                     | LexA  |
| <b>LiaR</b> | BSU33080 | RBAM_030210 | BPUM_2963<br>BPUM_3507 | BLi03492             | Aflv_0172 | GK0434 | BC1439           | BH1200 | ABC3374 | OB2822           | Pjdr2_4785               | Cell wall-active antibiotics stress response     | LuxR  |
| <b>LicR</b> | BSU38600 | RBAM_035800 | BPUM_3541              | BLi04090             | -         | -      | BC0806           | -      | ABC0485 | OB2764           | -                        | Beta-glucosides utilization                      | BglG  |
| <b>LmrA</b> | BSU02680 | RBAM_002990 | -                      | -                    | -         | -      | -                | -      | -       | -                | -                        | Multidrug resistance                             | TetR  |
| <b>LutR</b> | BSU34180 | RBAM_031490 | BPUM_3062              | BLi03676             | Aflv_2010 | GK0396 | BC1302           | BH1835 | ABC0978 | OB0369           | -                        | Lactate utilization                              | GntR  |
| <b>LytT</b> | BSU28920 | RBAM_025960 | BPUM_2535              | BLi03039             | -         | -      | BC5440           | -      | -       | -                | -                        | Cell autolysis                                   | LytTR |
| <b>MalR</b> | BSU31530 | RBAM_028630 | BPUM_2821              | BLi03335             | -         | -      | BC0578           | -      | -       | -                | -                        | Malate utilization                               | CitB  |
| <b>ManR</b> | BSU12000 | RBAM_024210 | -                      | BLi02111             | -         | -      | -                | -      | -       | -                | -                        | Mannose utilization                              | BglG  |
| <b>MdxR</b> | BSU34630 | -           | -                      | BLi00657             | -         | -      | -                | -      | -       | -                | -                        | Maltodextrin utilization                         | LacI  |
| <b>MhqR</b> | BSU13670 | RBAM_013430 | BPUM_1258              | BLi01522<br>BLi02022 | Aflv_1578 | GK0958 | BC1337<br>BC3128 | -      | ABC0738 | OB0603<br>OB0445 | Pjdr2_5975               | 2-Methylhydroquinone and catechol resistance (th | MarR  |
| <b>MntR</b> | BSU24520 | RBAM_022840 | BPUM_2184              | BLi02623             | Aflv_0923 | GK2416 | BC4204           | BH2807 | ABC2487 | OB1900           | Pjdr2_2278               | Manganese homeostasis                            | DtxR  |
| <b>MsmR</b> | BSU30260 | RBAM_027180 | BPUM_1754              | BLi01139             | -         | -      | -                | BH2227 | -       | -                | -                        | Alpha-galactosides utilization                   | LacI  |
| <b>MtIR</b> | BSU04160 | RBAM_004390 | BPUM_0388              | BLi00508             | Aflv_1564 | GK1947 | -                | BH3853 | ABC2928 | OB2602           | Pjdr2_6225               | Mannitol utilization                             | BglG  |
| <b>MurR</b> | BSU01690 | -           | BPUM_0157              | BLi00190             | -         | -      | -                | -      | -       | -                | -                        | N-acetylmuramate utilization                     | RpiR  |
| <b>NagR</b> | BSU35030 | RBAM_032220 | BPUM_3140              | BLi04350             | -         | GK2275 | BC4053           | BH0419 | ABC1488 | OB0612           | -                        | N-acetylglucosamine utilization                  | GntR  |
| <b>NiaR</b> | BSU27890 | RBAM_024940 | BPUM_2429              | BLi02916             | Aflv_0701 | GK2603 | BC4425           | BH1216 | ABC1545 | -                | -                        | NAD biosynthesis                                 | NiaR  |
| <b>NrdR</b> | BSU29000 | RBAM_026040 | BPUM_2544              | BLi03048             | Aflv_0517 | GK2723 | BC4581           | BH3146 | ABC2702 | OB2158           | Pjdr2_1529               | Deoxyribonucleotide biosynthesis                 | NrdR  |
| <b>NsrR</b> | BSU09380 | RBAM_009640 | BPUM_0893              | BLi01005             | -         | GK1738 | -                | BH1057 | ABC0349 | OB0292           | -                        | Nitrosative stress                               | Rrf2  |
| <b>NtdR</b> | BSU10560 | -           | BPUM_0279              | BLi03947             | -         | -      | -                | -      | -       | -                | -                        | Neotrehalosadiazine biosynthesis                 | LacI  |
| <b>OhrR</b> | BSU13150 | RBAM_012960 | BPUM_1212              | BLi01415             | -         | GK1864 | BC4474           | -      | -       | OB3458           | Pjdr2_1135               | Peroxide stress response                         | MarR  |
| <b>PadR</b> | BSU08340 | RBAM_008450 | BPUM_0713              | BLi03079             | -         | -      | -                | -      | -       | -                | -                        | Phenolic acid stress response                    | PadR  |

|                   |          |             |           |          |           |        |        |        |         |        |            |                                               |      |
|-------------------|----------|-------------|-----------|----------|-----------|--------|--------|--------|---------|--------|------------|-----------------------------------------------|------|
| <b>PerR</b>       | BSU08730 | RBAM_008820 | BPUM_0827 | Bli00900 | Aflv_0369 | GK0478 | BC0518 | BH0951 | ABC1322 | OB0905 | Pjdr2_1094 | Oxidative and peroxide stress                 | Fur  |
| <b>PurR</b>       | BSU00470 | RBAM_000560 | BPUM_0031 | Bli00060 | Aflv_0040 | GK0040 | BC0051 | BH0062 | ABC0075 | OB0056 | Pjdr2_0032 | Purine metabolism                             | PurR |
| <b>PutR</b>       | BSU03230 | RBAM_003470 | BPUM_0302 | Bli00376 | -         | -      | -      | -      | -       | -      | -          | Proline utilization                           | SrmR |
| <b>QdoR</b>       | BSU39990 | RBAM_032230 | BPUM_0235 | Bli01311 | -         | -      | -      | -      | -       | -      | -          | Multidrug resistance                          | TetR |
| <b>RbsR</b>       | BSU35910 | RBAM_033080 | BPUM_3263 | Bli03840 | Aflv_2673 | GK3231 | BC0659 | BH3727 | ABC3549 | OB2577 | Pjdr2_3988 | Ribose utilization                            | Lacl |
| <b>Rex</b>        | BSU05970 | RBAM_006420 | BPUM_0528 | Bli00618 | Aflv_0208 | GK0242 | BC0291 | BH0551 | ABC0873 | OB0652 | Pjdr2_2450 | Anaerobic metabolism                          | Rex  |
| <b>RhaR</b>       | BSU31210 | -           | -         | Bli03557 | -         | -      | -      | BH1553 | -       | OB0498 | Pjdr2_3763 | Rhamnose utilization                          | DeoR |
| <b>RhgR</b>       | BSU07010 | -           | -         | Bli01372 | -         | -      | -      | -      | -       | -      | Pjdr2_4099 | Rhamnogalacturonan utilization                | AraC |
| <b>RmgR</b>       | BSU30150 | -           | BPUM_2661 | Bli03167 | -         | -      | -      | BH0483 | ABC1143 | OB2093 | Pjdr2_1800 | Rhamnogalacturonan utilization                | AraC |
| <b>RocR</b>       | BSU40350 | RBAM_037260 | BPUM_3061 | Bli00421 | -         | GK0185 | BC0473 | BH3944 | ABC0016 | -      | -          | Arginine degradation; Ornithine degradation   | Fis  |
| <b>SdpR</b>       | BSU33790 | -           | -         | Bli00787 | Aflv_1587 | GK2134 | BC4834 | BH0945 | ABC3711 | -      | Pjdr2_5471 | SdpC antitoxin system involved in sporulation | ArsR |
| <b>SinR</b>       | BSU24610 | RBAM_022930 | BPUM_2193 | Bli02636 | -         | -      | -      | BH2125 | -       | -      | -          | Biofilm formation                             | Xre  |
| <b>TnrA</b>       | BSU13310 | RBAM_013130 | BPUM_1230 | Bli01490 | Aflv_1544 | GK1860 | -      | BH1494 | ABC1760 | OB0950 | Pjdr2_5154 | Nitrogen assimilation                         | MerR |
| <b>TreR</b>       | BSU07820 | RBAM_007990 | BPUM_0730 | Bli00798 | Aflv_1439 | GK1745 | BC0630 | BH0873 | ABC1265 | -      | -          | Trehalose utilization                         | GntR |
| <b>XylR</b>       | BSU17590 | RBAM_017340 | BPUM_1830 | Bli04049 | -         | GK2422 | -      | BH2758 | ABC0575 | OB3124 | Pjdr2_5182 | Xylose utilization                            | ROK  |
| <b>YbzH</b>       | BSU01889 | RBAM_018560 | -         | Bli00209 | -         | -      | -      | -      | ABC1381 | -      | -          | Metabolite transport                          | ArsR |
| <b>YcnK</b>       | BSU03960 | RBAM_004210 | -         | Bli00481 | -         | -      | -      | -      | -       | -      | -          | Copper homeostasis                            | DeoR |
| <b>YcxD</b>       | BSU03560 | RBAM_003730 | BPUM_0326 | Bli00406 | -         | -      | -      | -      | -       | -      | Pjdr2_0546 | Multidrug efflux                              | GntR |
| <b>YczG</b>       | BSU03880 | RBAM_004130 | BPUM_0360 | Bli00472 | -         | -      | BC1998 | -      | -       | -      | -          | Oxidative stress response                     | ArsR |
| <b>YdeL, Yhdl</b> | BSU05240 | RBAM_005860 | -         | -        | -         | -      | BC2068 | -      | -       | -      | -          | -                                             | -    |
|                   | BSU09480 | RBAM_005770 | -         | -        | -         | -      | BC0583 | -      | -       | -      | -          | Metabolite transport                          | GntR |
| <b>YdeP</b>       | BSU05290 | -           | -         | -        | -         | -      | -      | -      | -       | OB0354 | -          | Oxidative stress response                     | HxlR |
|                   | BSU05370 | -           | -         | -        | -         | -      | BC2680 | -      | -       | -      | -          | -                                             | -    |
| <b>YdfD, YisV</b> | BSU10880 | -           | -         | -        | -         | -      | BC1987 | BH0432 | ABC1201 | -      | Pjdr2_2789 | Metabolite transport                          | GntR |
| <b>YdfF</b>       | BSU05390 | -           | -         | Bli03718 | -         | -      | -      | BH0391 | ABC1174 | -      | -          | -                                             | ArsR |
| <b>YdfI</b>       | BSU05420 | RBAM_005930 | -         | Bli04066 | -         | -      | -      | -      | -       | -      | -          | Metabolite transport                          | LuxR |
| <b>YdfL</b>       | BSU05460 | -           | -         | Bli02816 | -         | -      | BC1614 | BH3496 | -       | -      | -          | Multidrug resistance                          | MerR |
| <b>YetL</b>       | BSU07220 | RBAM_007360 | -         | -        | -         | -      | -      | -      | -       | -      | -          | Flavonoids response                           | MarR |
| <b>YfmP</b>       | BSU07390 | RBAM_007640 | BPUM_0692 | Bli00773 | -         | -      | BC5373 | -      | -       | -      | Pjdr2_6009 | Metal efflux                                  | MerR |
| <b>YhcF</b>       | BSU09060 | RBAM_009330 | -         | -        | -         | -      | BC1356 | BH0383 | ABC1460 | -      | Pjdr2_3930 | Multidrug resistance                          | GntR |
| <b>YhgD</b>       | BSU10150 | RBAM_010380 | BPUM_0961 | Bli01095 | Aflv_2277 | GK0664 | BC1077 | BH2145 | -       | -      | Pjdr2_1195 | -                                             | TetR |
| <b>YisR</b>       | BSU10830 | RBAM_010980 | BPUM_1014 | Bli01178 | Aflv_2193 | GK0702 | -      | -      | -       | -      | -          | Metabolite transport                          | AraC |
| <b>YizB</b>       | BSU11079 | -           | -         | -        | -         | -      | -      | -      | -       | OB0948 | -          | -                                             | MarR |
| <b>YkvZ</b>       | BSU13870 | RBAM_013640 | BPUM_1277 | Bli01596 | -         | -      | BC4211 | -      | -       | -      | -          | Beta-glucosides utilization                   | Lacl |

|             |          |             |           |          |           |        |        |        |         |         |            |                                                 |                                          |      |
|-------------|----------|-------------|-----------|----------|-----------|--------|--------|--------|---------|---------|------------|-------------------------------------------------|------------------------------------------|------|
| <b>YodB</b> | BSU19540 | RBAM_019300 | BPUM_1875 | Bli02274 | Aflv_1958 | -      | BC5197 | BH0508 | -       | -       | Pjdr2_4807 | Oxidative stress response                       | HxlR                                     |      |
| <b>YrkD</b> | BSU26550 | RBAM_005420 | BPUM_0189 | Bli02795 | Aflv_1433 | GK2071 | BC0792 | -      | -       | OB2653  | -          |                                                 | RcnR                                     |      |
| <b>YtcD</b> | BSU29030 | RBAM_026070 | BPUM_2662 | Bli02840 | -         | -      | -      | -      | -       | -       | Pjdr2_0323 | Multidrug resistance                            | HxlR                                     |      |
| <b>YtII</b> | BSU29400 | RBAM_030860 | -         | -        | -         | -      | -      | -      | -       | -       | -          | L-cystine transporter                           | LysR                                     |      |
| <b>YtrA</b> | BSU30460 | RBAM_027400 | BPUM_2677 | Bli03185 | Aflv_1397 | GK1620 | BC4076 | -      | -       | -       | -          | Hypothetical ABC transporter                    | GntR                                     |      |
| <b>YuaC</b> | BSU31070 | RBAM_028170 | BPUM_2736 | Bli03271 | -         | -      | -      | -      | -       | -       | -          | Glycine betaine synthesis                       | MarR                                     |      |
| <b>YvaV</b> | BSU33740 | RBAM_031060 | BPUM_3044 | Bli03652 | -         | -      | -      | -      | ABC1772 | -       | -          | Choline transporter                             | MarR                                     |      |
| <b>YvbF</b> | BSU33840 | RBAM_031110 | -         | -        | -         | -      | -      | -      | -       | -       | -          | Glycine betaine/carnitine/choline transport     | MarR                                     |      |
| <b>YvcP</b> | BSU34720 | -           | -         | -        | -         | -      | BC4433 | BH0755 | ABC3227 | -       | Pjdr2_4845 | Bacitracin resistance                           | OmpR                                     |      |
| <b>YvfU</b> | BSU34060 | -           | -         | Bli04304 | -         | -      | BC5352 | -      | -       | -       | Pjdr2_0719 | Metabolite transport                            | LuxR                                     |      |
| <b>Ywbl</b> | BSU38310 | RBAM_035570 | BPUM_3485 | Bli04054 | -         | -      | -      | -      | -       | -       | Pjdr2_1917 | Thiamine biosynthesis                           | LysR                                     |      |
| <b>YwrC</b> | BSU36110 | RBAM_033280 | BPUM_3273 | Bli03851 | -         | -      | -      | -      | -       | -       | Pjdr2_5904 | Chromate transport                              | AsnC                                     |      |
| <b>YybA</b> | BSU40710 | RBAM_037790 | -         | Bli00581 | -         | -      | -      | BH3077 | ABC3242 | OB1246  | Pjdr2_5021 | Polyamine homeostasis                           | MarR                                     |      |
| <b>YybR</b> | BSU40540 | RBAM_037620 | BPUM_3162 | Bli00812 | -         | -      | BC3320 | BH0737 | ABC0784 | -       | Pjdr2_4452 | Oxidative stress response                       | HxlR                                     |      |
| <b>Zur</b>  | BSU25100 | RBAM_023410 | BPUM_2241 | Bli02686 | Aflv_0869 | GK2469 | BC4277 | BH1396 | ABC1704 | OB2398  | Pjdr2_2271 | Zinc homeostasis                                | Fur                                      |      |
| <b>Abh</b>  | BSU14480 | RBAM_014220 | BPUM_1344 | Bli01664 | -         | -      | -      | -      | -       | -       | -          | Transition state genes; Biofilm formtion        | AbrB                                     |      |
| <b>AbrB</b> | BSU00370 | RBAM_000460 | BPUM_0021 | Bli00050 | Aflv_0031 | GK0030 | BC0042 | BC1884 | BH0050  | ABC0058 | OB0045     | Pjdr2_0021                                      | Transition state genes; Biofilm formtion | AbrB |
| <b>AlaR</b> | BSU31410 | RBAM_028510 | BPUM_2808 | Bli03321 | Aflv_2391 | GK2929 | BC4902 | BH3351 | ABC2914 | -       | Pjdr2_1403 | Alanine metabolism                              | AsnC                                     |      |
| <b>AzIB</b> | BSU26720 | -           | -         | -        | -         | -      | -      | -      | -       | -       | -          | 4-azaleucine resistance                         | AsnC                                     |      |
| <b>CoiA</b> | BSU11530 | RBAM_011530 | BPUM_1081 | Bli01246 | Aflv_2123 | GK0821 | BC1192 | BH2857 | ABC2526 | OB1215  | -          | Competence                                      | CoiA                                     |      |
| <b>ComK</b> | BSU10420 | RBAM_010600 | BPUM_0978 | Bli01119 | -         | GK0678 | BC1134 | -      | -       | OB1177  | -          | Competence                                      | ComK                                     |      |
| <b>CueR</b> | BSU09560 | RBAM_009790 | BPUM_0905 | Bli01027 | Aflv_2367 | -      | BC3356 | -      | -       | -       | Pjdr2_2140 |                                                 | MerR                                     |      |
| <b>DegU</b> | BSU35490 | RBAM_032640 | BPUM_3198 | Bli03793 | Aflv_2598 | GK3150 | -      | BH3628 | ABC3086 | OB2519  | -          | Competence; Swarming; Flagellum formation; Biof | LuxR                                     |      |
| <b>DnaA</b> | BSU00010 | RBAM_000010 | BPUM_0001 | Bli00001 | Aflv_0001 | GK0001 | BC0001 | BH0001 | ABC0001 | OB0001  | Pjdr2_0001 | Chromosomal replication initiation              | DnaA                                     |      |
| <b>GerE</b> | BSU28410 | RBAM_025480 | BPUM_2495 | Bli02989 | Aflv_0584 | GK2670 | BC4501 | BH3075 | -       | OB2110  | Pjdr2_1442 | Germination                                     | LuxR                                     |      |
| <b>Hpr</b>  | BSU09990 | RBAM_010230 | BPUM_0944 | Bli01078 | Aflv_2290 | GK0652 | BC1047 | BH1185 | ABC1529 | -       | -          | Transition state genes                          | MarR                                     |      |
| <b>LrpA</b> | BSU05050 | RBAM_005220 | BPUM_0308 | Bli03116 | -         | -      | -      | -      | -       | -       | -          | One-carbon metabolism                           | AsnC                                     |      |
| <b>LrpB</b> | BSU05060 | -           | -         | -        | -         | -      | BC5097 | -      | -       | -       | -          | One-carbon metabolism                           | AsnC                                     |      |
| <b>LrpC</b> | BSU04250 | RBAM_004470 | BPUM_3418 | Bli00517 | -         | -      | BC1363 | BH0423 | ABC1203 | -       | -          | One-carbon metabolism; Branched chain amino as  | AsnC                                     |      |
| <b>Mta</b>  | BSU36600 | -           | -         | -        | -         | -      | -      | -      | -       | -       | -          | Multidrug transporter                           | MerR                                     |      |
| <b>NatR</b> | BSU02740 | -           | BPUM_0251 | -        | -         | GK1480 | -      | -      | -       | -       | -          |                                                 | LytTR                                    |      |

|               |          |             |           |                      |           |        |                  |                  |         |        |            |                                                 |        |
|---------------|----------|-------------|-----------|----------------------|-----------|--------|------------------|------------------|---------|--------|------------|-------------------------------------------------|--------|
| <b>PhoP</b>   | BSU29110 | RBAM_026150 | BPUM_2553 | Bli03059             | Aflv_0508 | GK2732 | BC4589           | BH3157           | ABC2711 | OB2165 | -          | Phosphate starvation                            | OmpR   |
| <b>PksA</b>   | BSU17080 | RBAM_009910 | BPUM_3015 | Bli03432             | -         | -      | -                | -                | -       | -      | -          | -                                               | TetR   |
| <b>PucR</b>   | BSU32420 | RBAM_029510 | -         | Bli03436             | -         | -      | -                | BH0757           | ABC3737 | -      | -          | Purine degradation                              | PucR   |
| <b>ResD</b>   | BSU23120 | RBAM_021260 | BPUM_2045 | Bli02458             | Aflv_1039 | GK2279 | BC1477           | BH1580           | ABC1835 | OB1819 | Pjdr2_2367 | Respiration                                     | OmpR   |
| <b>RghR</b>   | BSU33660 | RBAM_030940 | -         | Bli03647             | -         | -      | -                | BH3549           | -       | -      | -          | rapG and rapH repressor                         | Xre    |
| <b>Rok</b>    | BSU14240 | RBAM_014000 | BPUM_1321 | Bli01637             | -         | -      | -                | -                | -       | -      | -          | Competence                                      | Rok    |
| <b>RsfA</b>   | BSU37620 | RBAM_034730 | BPUM_3396 | Bli02985             | Aflv_2758 | GK3414 | BC5385           | -                | -       | -      | -          | Sporulation                                     | RsfA   |
| <b>Slr</b>    | BSU34380 | RBAM_031680 | BPUM_3084 | Bli03695             | -         | -      | -                | -                | -       | -      | -          | Cell separation; Motility/antirepressor of SinR | Xre    |
| <b>Spo0A</b>  | BSU24220 | RBAM_022550 | BPUM_2154 | Bli02593             | Aflv_0953 | GK2387 | BC4170           | BH2773           | ABC2457 | OB1872 | Pjdr2_2318 | Sporulation                                     | Spo0A  |
| <b>SpoIID</b> | BSU36420 | RBAM_033620 | BPUM_3291 | Bli03878             | Aflv_2684 | GK3334 | BC5282           | BH3740           | ABC3842 | OB2959 | Pjdr2_5794 | Sporulation                                     | SpoIID |
| <b>SpoVT</b>  | BSU00560 | RBAM_000650 | BPUM_0040 | Bli00069             | Aflv_0049 | GK0049 | BC0059           | BH0070           | ABC0084 | OB0064 | Pjdr2_0043 | Germination                                     | AbrB   |
| <b>WalR</b>   | BSU40410 | RBAM_037400 | BPUM_3689 | Bli04335             | Aflv_2840 | GK3474 | -                | BH4027           | ABC4099 | OB3452 | -          | Cell wall metabolism                            | OmpR   |
| <b>Xre</b>    | BSU12510 | RBAM_012510 | BPUM_2777 | Bli01318             | -         | -      | -                | -                | -       | -      | -          | Defective prophage PBSX                         | Xre    |
| <b>YazB</b>   | BSU00800 | -           | BPUM_0064 | -                    | -         | GK0072 | BC0082           | BH0096           | -       | OB3501 | Pjdr2_0081 | Folate bithythesis                              | Xre    |
| <b>YbdJ</b>   | BSU02000 | -           | -         | -                    | -         | -      | BC3043           | -                | -       | -      | -          | -                                               | OmpR   |
| <b>YbfA</b>   | BSU02160 | RBAM_005520 | -         | Bli00446             | -         | -      | -                | -                | -       | -      | -          | -                                               | MarR   |
| <b>Ybfl</b>   | BSU02220 | -           | -         | Bli00253<br>Bli00252 | -         | -      | -                | -                | ABC0246 | -      | -          | -                                               | AraC   |
| <b>YbfP</b>   | BSU02320 | -           | BPUM_0583 | -                    | -         | GK0170 | BC0213<br>BC4832 | -                | ABC3529 | -      | -          | -                                               | AraC   |
| <b>YcbL</b>   | BSU02550 | RBAM_035010 | -         | Bli00291             | -         | GK1643 | BC4539           | BH0820           | ABC1169 | OB1714 | -          | -                                               | OmpR   |
| <b>YccF</b>   | BSU02720 | RBAM_003020 | BPUM_0247 | Bli00311             | -         | -      | -                | -                | -       | -      | -          | -                                               | Psq    |
| <b>YceK</b>   | BSU02970 | -           | -         | -                    | -         | -      | -                | -                | -       | -      | -          | -                                               | ArsR   |
| <b>YcgE</b>   | BSU03080 | RBAM_003310 | BPUM_1765 | Bli02175             | -         | -      | -                | -                | -       | -      | Pjdr2_0574 | -                                               | MarR   |
| <b>YcgK</b>   | BSU03170 | -           | BPUM_0295 | -                    | -         | -      | -                | -                | -       | -      | Pjdr2_2472 | -                                               | LysR   |
| <b>YclJ</b>   | BSU03750 | RBAM_003990 | BPUM_0353 | Bli00459             | -         | -      | -                | -                | -       | -      | -          | -                                               | OmpR   |
| <b>YcnC</b>   | BSU03850 | RBAM_004100 | BPUM_0358 | Bli00468             | -         | -      | -                | -                | -       | -      | -          | -                                               | TetR   |
| <b>YdcH</b>   | BSU04770 | -           | -         | -                    | -         | -      | BC0848           | -                | -       | -      | -          | -                                               | MarR   |
| <b>YdcN</b>   | BSU04820 | -           | -         | -                    | -         | -      | -                | -                | -       | -      | -          | Phage element (ICEBs1)                          | Xre    |
| <b>YdeC</b>   | BSU05150 | -           | -         | -                    | -         | -      | -                | BH1906<br>BH0724 | -       | -      | Pjdr2_1146 | -                                               | AraC   |
|               |          |             |           |                      |           |        |                  |                  | ABC1962 |        | Pjdr2_0638 |                                                 |        |
|               |          |             |           |                      |           |        |                  |                  | ABC2793 | OB0722 | Pjdr2_4047 |                                                 |        |
| <b>YdeE</b>   | BSU05170 | -           | -         | Bli01015             | -         | -      | BC1115           | BH0594           | ABC2793 | OB0722 | Pjdr2_0534 | -                                               | AraC   |
| <b>YdeF</b>   | BSU05180 | -           | -         | -                    | -         | -      | -                | -                | -       | -      | Pjdr2_3196 | -                                               | GntR   |

|      |          |             |           |          |           |        |                  |        |         |        |                          |                                     |
|------|----------|-------------|-----------|----------|-----------|--------|------------------|--------|---------|--------|--------------------------|-------------------------------------|
| YdeS | BSU05320 | -           | -         | -        | -         | -      | BC3163           | -      | -       | -      | Pjdr2_0210               | TetR                                |
| YdgC | BSU05580 | -           | -         | BLi02514 | -         | -      | -                | -      | -       | -      | -                        | TetR                                |
| YdgG | BSU05640 | -           | -         | -        | -         | -      | -                | -      | -       | -      | -                        | MarR                                |
| YdgJ | BSU05670 | RBAM_037770 | BPUM_3583 | -        | -         | -      | BC3025           | -      | -       | -      | -                        | MarR                                |
| YdhC | BSU05700 | RBAM_006100 | BPUM_0397 | BLi00487 | -         | -      | -                | -      | ABC0840 | OB2880 | -                        | GntR                                |
| YdzF | BSU05270 | -           | -         | -        | -         | -      | -                | -      | -       | -      | -                        | HxlR                                |
| YerO | BSU06700 | RBAM_007100 | BPUM_0647 | BLi00736 | -         | -      | BC5434           | BH1887 | -       | -      | -                        | Surfactin self-resistance           |
| YesN | BSU06960 | -           | -         | -        | -         | -      | -                | -      | -       | -      | -                        | AraC                                |
| YezC | BSU06540 | -           | -         | -        | -         | -      | -                | -      | -       | -      | -                        | AsnC                                |
| YezE | BSU06860 | -           | -         | BLi01953 | -         | -      | -                | -      | -       | -      | Pjdr2_1646<br>Pjdr2_3113 | TetR                                |
| YfiF | BSU08250 | -           | -         | -        | -         | -      | -                | -      | -       | -      | Pjdr2_2977               | AraC                                |
| YfiK | BSU08300 | -           | -         | -        | -         | -      | -                | -      | -       | -      | Pjdr2_5484               | LuxR                                |
| YfiR | BSU08370 | -           | -         | -        | -         | -      | -                | -      | -       | -      | Pjdr2_2486               | TetR                                |
| YfiV | BSU08410 | RBAM_008520 | BPUM_0786 | BLi03747 | -         | -      | -                | -      | -       | -      | -                        | MarR                                |
| YgzD | BSU08899 | -           | -         | BLi00946 | -         | -      | BC0680           | -      | -       | -      | -                        | Xre                                 |
| Yhbl | BSU08990 | RBAM_009270 | -         | -        | -         | -      | -                | -      | -       | -      | -                        | Multidrug resistance                |
| YhcZ | BSU09330 | RBAM_009590 | BPUM_0887 | BLi01001 | -         | -      | BC2217<br>BC5411 | BH2213 | ABC3142 | -      | Pjdr2_4954               | LuxR                                |
| YhjH | BSU10510 | RBAM_010730 | -         | BLi01694 | -         | -      | -                | -      | -       | -      | -                        | MarR                                |
| YkoG | BSU13250 | -           | BPUM_1219 | -        | -         | -      | -                | BH0372 | -       | OB0594 | Pjdr2_2638               | OmpR                                |
| YkoM | BSU13340 | RBAM_013160 | BPUM_1233 | BLi01493 | -         | -      | -                | -      | -       | -      | -                        | MarR                                |
| YkvN | BSU13760 | RBAM_013530 | -         | -        | -         | -      | -                | -      | -       | -      | -                        | HxlR                                |
| YmfC | BSU16810 | RBAM_016660 | BPUM_1586 | BLi01907 | Aflv_1676 | GK1282 | BC3792           | BH2394 | ABC2209 | OB1615 | -                        | GntR                                |
| YoaU | BSU18760 | -           | -         | BLi01305 | -         | -      | -                | -      | -       | -      | -                        | Cysteine and O-acetyl serine efflux |
| YobD | BSU18850 | -           | -         | -        | -         | -      | -                | -      | -       | -      | -                        | Xre                                 |
| YobQ | BSU19050 | RBAM_018850 | -         | -        | -         | -      | -                | BH1786 | -       | -      | -                        | AraC                                |
| YobS | BSU19070 | RBAM_018860 | BPUM_1838 | BLi02194 | -         | -      | BC5000           | -      | -       | -      | Pjdr2_4902               | TetR                                |
| YobV | BSU19100 | -           | BPUM_1841 | BLi02199 | -         | -      | -                | -      | -       | -      | Pjdr2_5136               | YobV                                |
| YofA | BSU18420 | RBAM_018580 | -         | -        | -         | -      | -                | -      | -       | -      | -                        | Cell division                       |
| YonR | BSU21020 | -           | -         | -        | -         | -      | -                | -      | -       | -      | -                        | Xre                                 |
| YopO | BSU20820 | -           | -         | -        | -         | -      | -                | -      | -       | -      | -                        | Xre                                 |
| YopS | BSU20780 | -           | -         | -        | -         | -      | -                | -      | -       | -      | -                        | Xre                                 |
| YotL | BSU19840 | -           | -         | -        | -         | -      | BC3704           | -      | -       | -      | Pjdr2_0622               | Xre                                 |





|      |          |             |           |          |           |        |        |        |         |        |            |                       |      |
|------|----------|-------------|-----------|----------|-----------|--------|--------|--------|---------|--------|------------|-----------------------|------|
| YwcC | BSU38220 | RBAM_035480 | -         | -        | -         | -      | -      | -      | -       | -      | -          | Galactose utilization | TetR |
| YwgB | BSU37580 | -           | -         | -        | -         | -      | -      | -      | -       | -      | -          |                       | Rrf2 |
| YwhA | BSU37550 | RBAM_034680 | BPUM_0238 | BLi00299 | -         | -      | -      | -      | -       | -      | -          |                       | MarR |
| YwnA | BSU36630 | RBAM_033800 | -         | BLi03912 | -         | -      | -      | -      | -       | -      | -          |                       | Rrf2 |
| YwoH | BSU36440 | RBAM_033630 | BPUM_3292 | BLi03879 | -         | -      | -      | -      | -       | OB1198 | -          |                       | MarR |
| YwqM | BSU36160 | -           | BPUM_2352 | -        | -         | -      | BC3476 | -      | -       | -      | Pjdr2_1475 |                       | LysR |
| YwzG | BSU38018 | RBAM_035250 | -         | -        | -         | -      | -      | -      | -       | -      | -          |                       | PadR |
| YxaD | BSU40010 | RBAM_002450 | -         | BLi03097 | -         | -      | -      | -      | -       | -      | Pjdr2_2157 | Murein hydrolase      | MarR |
| YxbF | BSU39850 | RBAM_036880 | -         | -        | -         | -      | -      | -      | -       | -      | -          |                       | TetR |
| YxdJ | BSU39660 | RBAM_036630 | -         | BLi04143 | -         | -      | -      | -      | -       | -      | -          |                       | OmpR |
| YxjL | BSU38910 | -           | -         | -        | -         | -      | -      | -      | -       | -      | Pjdr2_5484 |                       | LuxR |
| YxjO | BSU38880 | -           | -         | -        | -         | -      | -      | -      | -       | -      | -          |                       | LysR |
| YxkF | BSU38820 | RBAM_036050 | BPUM_0953 | BLi01053 | Aflv_2302 | GK0632 | -      | BH1141 | ABC1515 | OB1135 | -          |                       | SrmR |
| YyaN | BSU40800 | -           | -         | -        | -         | -      | -      | -      | -       | -      | -          |                       | MerR |
| YybE | BSU40670 | RBAM_037740 | -         | BLi02845 | -         | -      | -      | -      | -       | -      | Pjdr2_4538 |                       | LysR |
