# Supplementary material
Source: PubMed Central journal article supplement (PMC3676070)
Supplement: JB.00140-13_zjb999092590so3.pdf [file JB.00140-13_zjb999092590so3.pdf]

**Table S2. Functional properties of reconstructed TF regulons in *B. subtilis* and related Bacillales.**

| TF name                                                                              | Species                            |                                        |                                   |                                      |                                       |                                        |                                   |                                  |                                 |                                        |                                | Functional Class* | Functional role                               | TF Family | Effector                      | Effector Evidence (PMID) | Previous Comparative genomics study (PMID) |  |
|--------------------------------------------------------------------------------------|------------------------------------|----------------------------------------|-----------------------------------|--------------------------------------|---------------------------------------|----------------------------------------|-----------------------------------|----------------------------------|---------------------------------|----------------------------------------|--------------------------------|-------------------|-----------------------------------------------|-----------|-------------------------------|--------------------------|--------------------------------------------|--|
|                                                                                      | <i>Bacillus subtilis</i> sstr. 168 | <i>Bacillus amyloiquefaciens</i> FZB42 | <i>Bacillus pumilus</i> SAFFR-032 | <i>Bacillus licheniformis</i> DSM 13 | <i>Anoxybacillus flavithermus</i> WK1 | <i>Geobacillus kaustophilus</i> HTA426 | <i>Bacillus cereus</i> ATCC 14579 | <i>Bacillus halodurans</i> C-125 | <i>Bacillus clausii</i> KSM-K16 | <i>Oceanobacillus iheyensis</i> HTE831 | <i>Paenibacillus</i> sp. JDR-2 |                   |                                               |           |                               |                          |                                            |  |
| <b>Part I. 36 regulators with previously unknown regulated genes and TFBS motifs</b> |                                    |                                        |                                   |                                      |                                       |                                        |                                   |                                  |                                 |                                        |                                |                   |                                               |           |                               |                          |                                            |  |
| HisR (YerC)                                                                          | 9                                  | 9                                      | 9                                 | 9                                    | 9                                     | 2                                      | 0                                 | 9                                | 9                               | 10                                     | 8                              | A                 | Histidine biosynthesis                        | TrpR      | Histidine                     | -                        | -                                          |  |
| BgIR (YydK)                                                                          | 3                                  | 2                                      | 2                                 | 0                                    | 0                                     | 0                                      | 0                                 | 0                                | 0                               | 0                                      | 0                              | C                 | Beta-glucosides utilization                   | GntR      | Salicin                       | -                        | -                                          |  |
| BglZ (YkvZ)                                                                          | 2                                  | 2                                      | 1                                 | 1                                    | 0                                     | 0                                      | 2                                 | 0                                | 0                               | 0                                      | 0                              | C                 | Beta-glucosides utilization                   | LacI      | Beta-glucosides               | -                        | -                                          |  |
| IoIR1 (DegA)                                                                         | 2                                  | 0                                      | 0                                 | 1                                    | 0                                     | 13                                     | 0                                 | 6                                | 0                               | 0                                      | 7                              | C                 | Inositol utilization                          | LacI      |                               | -                        | -                                          |  |
| FruR                                                                                 | 3                                  | 3                                      | 3                                 | 3                                    | 3                                     | 3                                      | 3                                 | 3                                | 3                               | 3                                      | 0                              | C                 | Fructose utilization                          | DeoR      | D-fructose-6-phosphate        | -                        | -                                          |  |
| GamR (YbgA)                                                                          | 3                                  | 0                                      | 0                                 | 7                                    | 0                                     | 0                                      | 0                                 | 6                                | 6                               | 6                                      | 0                              | C                 | Glucosamine utilization                       | GntR      | Glucosamine-6-phosphate       | -                        | -                                          |  |
| MdxR (YvdE)                                                                          | 7                                  | 0                                      | 0                                 | 7                                    | 0                                     | 0                                      | 0                                 | 0                                | 0                               | 0                                      | 0                              | C                 | Maltodextrin utilization                      | LacI      |                               | -                        | -                                          |  |
| MsmR                                                                                 | 5                                  | 5                                      | 5                                 | 5                                    | 0                                     | 0                                      | 0                                 | 5                                | 0                               | 0                                      | 0                              | C                 | Alpha-galactosides utilization                | LacI      |                               | -                        | -                                          |  |
| MurR (YbbH)                                                                          | 6                                  | 0                                      | 6                                 | 6                                    | 0                                     | 0                                      | 0                                 | 0                                | 0                               | 0                                      | 0                              | C                 | N-acetylmuramate utilization                  | RpiR      | N-acetylmuramate-6-phosphate  | -                        | -                                          |  |
| RbsR                                                                                 | 7                                  | 6                                      | 6                                 | 6                                    | 6                                     | 6                                      | 5                                 | 6                                | 6                               | 6                                      | 6                              | C                 | Ribose utilization                            | LacI      | Ribose                        | -                        | 11750820                                   |  |
| RhaR (YulB)                                                                          | 5                                  | 0                                      | 0                                 | 5                                    | 0                                     | 0                                      | 0                                 | 4                                | 0                               | 2                                      | 4                              | C                 | Rhamnose utilization                          | DeoR      | Rhamnose                      | -                        | -                                          |  |
| RhgR (YesS)                                                                          | 17                                 | 0                                      | 0                                 | 19                                   | 0                                     | 0                                      | 0                                 | 0                                | 0                               | 0                                      | 3                              | C                 | Rhamnogalacturonan utilization                | AraC      |                               | -                        | -                                          |  |
| RmgR (YtdP)                                                                          | 5                                  | 0                                      | 5                                 | 5                                    | 0                                     | 0                                      | 0                                 | 11                               | 11                              | 7                                      | 3                              | C                 | Rhamnogalacturonan utilization                | AraC      |                               | -                        | -                                          |  |
| NrdR                                                                                 | 4                                  | 4                                      | 4                                 | 4                                    | 4                                     | 3                                      | 3                                 | 3                                | 4                               | 3                                      | 4                              | N                 | Deoxyribonucleotide biosynthesis              | LacI      | Deoxyribonucleotides          | -                        | 15949864                                   |  |
| YisR                                                                                 | 1                                  | 1                                      | 1                                 | 1                                    | 1                                     | 1                                      | 0                                 | 0                                | 0                               | 0                                      | 0                              | R                 | Multidrug resistance                          | AraC      |                               | -                        | -                                          |  |
| YbzH                                                                                 | 2                                  | 2                                      | 0                                 | 2                                    | 0                                     | 0                                      | 0                                 | 0                                | 2                               | 0                                      | 0                              | R                 | Hypothetical efflux transporter               | ArsR      |                               | -                        | -                                          |  |
| YczG                                                                                 | 3                                  | 3                                      | 0                                 | 3                                    | 0                                     | 0                                      | 2                                 | 0                                | 0                               | 0                                      | 0                              | R                 | Aromatic compound detoxification              | ArsR      |                               | -                        | -                                          |  |
| YwrC                                                                                 | 3                                  | 3                                      | 3                                 | 3                                    | 0                                     | 0                                      | 0                                 | 0                                | 0                               | 0                                      | 3                              | R                 | Metal efflux transporter                      | AsnC      |                               | -                        | -                                          |  |
| YhcF                                                                                 | 5                                  | 5                                      | 0                                 | 0                                    | 0                                     | 0                                      | 5                                 | 3                                | 2                               | 0                                      | 4                              | R                 | Multidrug resistance                          | GntR      |                               | -                        | -                                          |  |
| YcxD                                                                                 | 2                                  | 2                                      | 2                                 | 2                                    | 0                                     | 0                                      | 0                                 | 0                                | 0                               | 0                                      | 2                              | R                 | Multidrug efflux                              | GntR      |                               | -                        | -                                          |  |
| YdfD/YisV                                                                            | 4                                  | 0                                      | 0                                 | 0                                    | 0                                     | 0                                      | 4                                 | 2                                | 2                               | 0                                      | 2                              | R                 | Hypothetical efflux transporter               | GntR      |                               | -                        | -                                          |  |
| YybR/YdeP                                                                            | 5                                  | 3                                      | 0                                 | 2                                    | 0                                     | 0                                      | 2                                 | 2                                | 2                               | 3                                      | 2                              | R                 | Hypothetical substance detoxification pæ HxIR |           |                               | -                        | -                                          |  |
| Ywbl                                                                                 | 3                                  | 3                                      | 3                                 | 2                                    | 0                                     | 0                                      | 0                                 | 0                                | 0                               | 0                                      | 2                              | R                 | Cell integrity protection                     | LysR      |                               | -                        | -                                          |  |
| LytT                                                                                 | 2                                  | 2                                      | 2                                 | 2                                    | 0                                     | 0                                      | 2                                 | 0                                | 0                               | 0                                      | 0                              | R                 | Cell integrity protection                     | LytTR     | LytS, sensor histidine kinase | -                        | -                                          |  |
| YuaC                                                                                 | 2                                  | 2                                      | 2                                 | 2                                    | 0                                     | 0                                      | 0                                 | 0                                | 2                               | 0                                      | 0                              | R                 | Osmotic stress response                       | MarR      |                               | -                        | -                                          |  |
| YvbF/YvaV                                                                            | 10                                 | 10                                     | 5                                 | 5                                    | 0                                     | 0                                      | 0                                 | 0                                | 0                               | 0                                      | 0                              | R                 | Osmotic stress response                       | MarR      |                               | -                        | -                                          |  |
| YybA                                                                                 | 5                                  | 4                                      | 0                                 | 4                                    | 0                                     | 0                                      | 0                                 | 3                                | 3                               | 2                                      | 2                              | R                 | Polyamine homeostasis                         | MarR      |                               | -                        | -                                          |  |

|                  |                                                                                    |    |   |    |    |    |    |    |   |   |   |     |                                             |      |                                                  |                   |
|------------------|------------------------------------------------------------------------------------|----|---|----|----|----|----|----|---|---|---|-----|---------------------------------------------|------|--------------------------------------------------|-------------------|
| YdfL             | 1                                                                                  | 0  | 0 | 1  | 0  | 0  | 1  | 1  | 0 | 0 | 0 | R   | Multidrug resistance                        | MerR | -                                                |                   |
| YrkD             | 6                                                                                  | 7  | 7 | 11 | 19 | 18 | 9  | 0  | 0 | 6 | 0 | R   | Hypothetical substance detoxification p     | RcnR | -                                                |                   |
| GlcR             | 2                                                                                  | 2  | 0 | 2  | 0  | 0  | 0  | 2  | 0 | 2 | 0 | U   |                                             | DeoR | -                                                |                   |
| YdfF             | 2                                                                                  | 0  | 0 | 3  | 0  | 0  | 0  | 2  | 3 | 0 | 0 | U   |                                             | ArsR | -                                                |                   |
| YhdI/YdeL        | 4                                                                                  | 2  | 0 | 2  | 0  | 0  | 4  | 0  | 0 | 0 | 0 | U   |                                             | GntR | -                                                |                   |
| YhgD             | 2                                                                                  | 2  | 2 | 2  | 2  | 3  | 1  | 2  | 0 | 0 | 0 | U   |                                             | TetR | -                                                |                   |
| YizB             | 3                                                                                  | 0  | 0 | 0  | 0  | 0  | 0  | 0  | 0 | 2 | 0 | U   |                                             | PadR | -                                                |                   |
| YtcD             | 3                                                                                  | 3  | 3 | 4  | 0  | 0  | 0  | 0  | 0 | 0 | 3 | U   |                                             | HxlR | -                                                |                   |
| YvfU             | 4                                                                                  | 0  | 0 | 6  | 0  | 0  | 4  | 0  | 0 | 0 | 4 | U   |                                             | LuxR | YvfT, sensor histidine kinase                    | -                 |
| <b>Part II.</b>  | <b>27 regulators with previously known regulated genes but unknown TFBS motifs</b> |    |   |    |    |    |    |    |   |   |   |     |                                             |      |                                                  |                   |
| AlsR             | 3                                                                                  | 3  | 3 | 3  | 0  | 0  | 0  | 0  | 0 | 0 | 0 | C   | Acetoin production                          | LysR | -                                                |                   |
| AnsR             | 3                                                                                  | 3  | 3 | 3  | 0  | 0  | 3  | 0  | 0 | 0 | 0 | A   | Asparagine degradation                      | Xre  | Asparagine                                       | -                 |
| ArsR             | 4                                                                                  | 0  | 0 | 0  | 0  | 0  | 4  | 2  | 2 | 2 | 0 | R   | Arsenic resistance                          | ArsR | Arsenite; Cadmium, ion (Cd <sup>2+</sup> ); Sil  | 15948947          |
| AseR             | 2                                                                                  | 2  | 0 | 2  | 3  | 6  | 0  | 3  | 3 | 3 | 0 | R   | Arsenic resistance                          | ArsR | Arsenite                                         | 15948947          |
| BirA             | 10                                                                                 | 10 | 5 | 7  | 7  | 7  | 10 | 7  | 3 | 2 | 7 | O   | Biotin biosynthesis                         | BirA | Biotin                                           | 8892842 12368242  |
| BsdA             | 5                                                                                  | 5  | 0 | 5  | 0  | 0  | 0  | 0  | 0 | 0 | 0 | R   | Salicylic acid resistance                   | LysR | Salicylate                                       | 17295427          |
| CcpB             | 6                                                                                  | 2  | 0 | 0  | 0  | 0  | 0  | 0  | 0 | 0 | 0 | C   | Carbon catabolism                           | Lacl | -                                                |                   |
| CitR             | 2                                                                                  | 2  | 0 | 2  | 0  | 0  | 0  | 0  | 2 | 0 | 0 | C   | Citrate metabolism                          | LysR | -                                                |                   |
| CssR             | 4                                                                                  | 4  | 4 | 4  | 0  | 0  | 0  | 0  | 0 | 3 | 0 | R   | Protein secretion stress response           | OmpR | CssS, sensor histidine kinase                    | -                 |
| CzrA             | 3                                                                                  | 3  | 1 | 2  | 2  | 5  | 3  | 0  | 2 | 2 | 2 | R   | Zinc resistance; Cadmium resistance; C      | ArsR | Silver ion, (Ag <sup>+</sup> ); Cadmium, ion (Cd | 15948947          |
| DctR             | 1                                                                                  | 1  | 1 | 0  | 0  | 1  | 0  | 0  | 0 | 0 | 0 | C   | C4-dicarboxylate transport                  | DeoR | -                                                |                   |
| FatR             | 2                                                                                  | 2  | 2 | 2  | 0  | 0  | 1  | 0  | 0 | 0 | 0 | R   | Toxic fatty acid stress response            | TetR | Oleic acid; $\gamma$ -Linolenic acid; Linoleic   | 11734890          |
| FrlR             | 6                                                                                  | 7  | 0 | 0  | 0  | 0  | 0  | 0  | 0 | 0 | 0 | A,C | Fructoselysine utilization                  | GntR | Fructoselysine 6-phosphate                       | -                 |
| GanR             | 6                                                                                  | 0  | 6 | 6  | 0  | 0  | 0  | 5  | 5 | 0 | 0 | C   | Galactan utilization                        | Lacl | -                                                |                   |
| Gltr             | 2                                                                                  | 0  | 0 | 0  | 0  | 0  | 0  | 0  | 0 | 0 | 3 | U   |                                             | LysR | -                                                |                   |
| GlvR             | 3                                                                                  | 3  | 0 | 3  | 0  | 0  | 0  | 0  | 0 | 0 | 0 | C   | Maltose utilization                         | RpiR | Maltose-6-phosphate                              | -                 |
| GmuR             | 8                                                                                  | 7  | 5 | 6  | 0  | 5  | 0  | 5  | 0 | 0 | 0 | C   | Glucomannan utilization                     | GntR | -                                                |                   |
| GudR             | 6                                                                                  | 0  | 0 | 6  | 0  | 0  | 0  | 0  | 6 | 7 | 0 | C   | Glucarate utilization; Galactarate utilizat | GntR | -                                                |                   |
| KipR             | 7                                                                                  | 7  | 6 | 7  | 0  | 5  | 7  | 2  | 0 | 0 | 0 | S   | Sporulation                                 | IclR | -                                                |                   |
| LutR             | 5                                                                                  | 5  | 3 | 5  | 5  | 4  | 3  | 4  | 4 | 5 | 0 | C   | Lactate utilization                         | GntR | L-lactate                                        | -                 |
| ManR             | 3                                                                                  | 3  | 0 | 3  | 0  | 0  | 0  | 0  | 0 | 0 | 0 | C   | Mannose utilization                         | BglG | ManP, mannose-specific enzyme II                 | -                 |
| MtlR             | 3                                                                                  | 3  | 3 | 3  | 5  | 1  | 0  | 0  | 0 | 4 | 0 | C   | Mannitol utilization                        | BglG | MtlA, mannitol-specific enzyme IIC               | 20444094          |
| NsrR             | 4                                                                                  | 4  | 4 | 5  | 0  | 2  | 0  | 1  | 2 | 2 | 0 | R   | Nitrosative stress response                 | Rrf2 | Nitric oxide                                     | 19006327 16261196 |
| NtdR             | 4                                                                                  | 0  | 4 | 4  | 0  | 0  | 0  | 0  | 0 | 0 | 0 | C   | Neotrehalosadiazine biosynthesis            | Lacl | 3,3'-neotrehalosadiazine                         | 14612444          |
| YcnK             | 3                                                                                  | 3  | 0 | 3  | 0  | 0  | 0  | 0  | 0 | 0 | 0 | M   | Copper homeostasis                          | DeoR | Copper ion, (Cu <sup>+</sup> )                   | -                 |
| YfmP             | 2                                                                                  | 2  | 2 | 2  | 0  | 0  | 2  | 0  | 0 | 0 | 3 | R,M | Metal efflux                                | MerR | -                                                | 14663075          |
| YvcP             | 2                                                                                  | 0  | 0 | 0  | 0  | 0  | 0  | 2  | 2 | 0 | 2 | R   | Bacitracin resistance                       | OmpR | YvcQ, sensor histidine kinase                    | -                 |
| <b>Part III.</b> | <b>66 regulators with previously known binding motifs</b>                          |    |   |    |    |    |    |    |   |   |   |     |                                             |      |                                                  |                   |
| AcoR             | 4                                                                                  | 4  | 4 | 1  | 0  | 0  | 4  | 4  | 0 | 0 | 0 | C   | Acetoin utilization                         | Fis  | Acetoin                                          | -                 |
| AdaA             | 3                                                                                  | 3  | 0 | 2  | 0  | 0  | 4  | 0  | 3 | 0 | 4 | R   | Adaptative response to DNA alkylation       | AraC | -                                                | -                 |
| AraR             | 13                                                                                 | 13 | 5 | 13 | 6  | 7  | 0  | 11 | 0 | 5 | 4 | C   | Arabinose utilization                       | GntR | Arabinose                                        | 10417639 11750820 |

|             |     |     |     |     |    |    |    |     |     |    |    |            |                                              |         |                                            |                    |          |
|-------------|-----|-----|-----|-----|----|----|----|-----|-----|----|----|------------|----------------------------------------------|---------|--------------------------------------------|--------------------|----------|
| <b>ArgR</b> | 18  | 15  | 14  | 16  | 10 | 10 | 11 | 12  | 9   | 11 | 7  | <b>A</b>   | Arginine biosynthesis; Arginine degrada      | ArgR    | Arginine                                   | 1312212            | 11305941 |
| <b>BceR</b> | 2   | 2   | 2   | 2   | 0  | 2  | 0  | 2   | 0   | 2  | 0  | <b>R</b>   | Bacitracin resistance                        | OmpR    | BceS, sensor histidine kinase (bacitracin) | -                  | -        |
| <b>BkdR</b> | 8   | 8   | 8   | 8   | 8  | 8  | 8  | 5   | 5   | 7  | 0  | <b>A</b>   | Branched-chain amino acid degradation        | Fis     | -                                          | -                  | -        |
| <b>BltR</b> | 2   | 2   | 2   | 0   | 0  | 0  | 0  | 1   | 0   | 0  | 0  | <b>R</b>   | Multidrug resistance                         | MerR    | -                                          | -                  | -        |
| <b>BmrR</b> | 2   | 0   | 0   | 1   | 0  | 0  | 0  | 0   | 0   | 0  | 0  | <b>R</b>   | Multidrug resistance                         | MerR    | -                                          | -                  | -        |
| <b>Btr</b>  | 4   | 4   | 2   | 4   | 0  | 0  | 0  | 0   | 4   | 0  | 0  | <b>M</b>   | Iron homeostasis                             | AraC    | Bacillibactin; Fe-Bacillibactin            | 17725565           | -        |
| <b>CcpA</b> | 217 | 171 | 144 | 195 | 50 | 44 | 44 | 119 | 119 | 81 | 25 | <b>C</b>   | Carbon catabolism                            | Lacl    | HPr, phosphocarries protein                | 19202299           | -        |
| <b>CcpC</b> | 5   | 4   | 2   | 2   | 0  | 0  | 1  | 0   | 0   | 2  | 0  | <b>C</b>   | Citrate metabolism                           | LysR    | Citrate                                    | 14636591           | -        |
| <b>CcpN</b> | 2   | 2   | 2   | 2   | 1  | 2  | 2  | 2   | 2   | 2  | 0  | <b>C</b>   | Gluconeogenesis                              | CcpN    | -                                          | -                  | -        |
| <b>CggR</b> | 6   | 6   | 6   | 6   | 6  | 6  | 2  | 6   | 6   | 6  | 6  | <b>C</b>   | Glycolysis                                   | SorC    | Fructose-1,6-bisphosphate                  | 12622823           | -        |
| <b>CitT</b> | 1   | 1   | 1   | 1   | 0  | 0  | 1  | 1   | 1   | 3  | 0  | <b>C</b>   | Citrate utilization                          | CitB    | Citrate                                    | 10972810           | -        |
| <b>CodY</b> | 156 | 143 | 87  | 97  | 62 | 27 | 51 | 40  | 12  | 49 | 34 | <b>A</b>   | Amino acid metabolism                        | CodY    | GTP; Branched-chain amino acids            | 15228537           | -        |
| <b>ComA</b> | 13  | 8   | 7   | 5   | 0  | 0  | 0  | 0   | 0   | 0  | 0  | <b>S</b>   | Competence                                   | LuxR    | ComP, sensor histidine kinase (ComP)       | -                  | -        |
| <b>CsoR</b> | 3   | 2   | 2   | 2   | 3  | 3  | 2  | 2   | 3   | 4  | 7  | <b>R,M</b> | Copper resistance                            | RcnR    | Copper ion, (Cu+)                          | 19249860           | -        |
| <b>CtsR</b> | 8   | 9   | 9   | 10  | 7  | 8  | 10 | 9   | 8   | 7  | 7  | <b>R</b>   | Heat shock response                          | CtsR    | Heat shock                                 | 20852588           | -        |
| <b>CymR</b> | 32  | 31  | 14  | 11  | 16 | 4  | 16 | 14  | 11  | 13 | 29 | <b>A</b>   | Cysteine metabolism                          | Rrf2    | O-acetyl-L-serine; CysK, cysteine synthase | 16513748           | -        |
| <b>CysL</b> | 3   | 3   | 3   | 3   | 11 | 3  | 0  | 5   | 1   | 11 | 2  | <b>I</b>   | Sulfite reduction                            | LysR    | Sulfate; Sulfite; Thiosulfate              | -                  | -        |
| <b>DeoR</b> | 3   | 3   | 3   | 3   | 0  | 0  | 4  | 0   | 0   | 0  | 0  | <b>N</b>   | Deoxynucleoside utilization                  | SorC    | Deoxyribose-5-phosphate                    | 10714997           | -        |
| <b>DesR</b> | 3   | 3   | 3   | 3   | 0  | 0  | 0  | 0   | 3   | 1  | 0  | <b>R</b>   | Cold shock response                          | LuxR    | -                                          | -                  | -        |
| <b>ExuR</b> | 10  | 5   | 4   | 5   | 0  | 0  | 0  | 0   | 0   | 0  | 0  | <b>C</b>   | Glucuronate/Galacturonate utilization        | Lacl    | Glucuronate; Galacturonate                 | -                  | -        |
| <b>FadR</b> | 11  | 10  | 14  | 14  | 12 | 14 | 10 | 13  | 12  | 10 | 0  | <b>F</b>   | Fatty acid degradation                       | TetR    | Palmitoyl-CoA; Oleoyl-CoA                  | 17189250           | -        |
| <b>FapR</b> | 10  | 10  | 10  | 13  | 8  | 8  | 15 | 9   | 8   | 11 | 10 | <b>F</b>   | Fatty acid biosynthesis                      | FapR    | Malonyl-CoA                                | 16932747           | -        |
| <b>Fnr</b>  | 10  | 8   | 2   | 13  | 0  | 1  | 1  | 6   | 0   | 0  | 1  | <b>P</b>   | Anaerobic metabolism                         | Fnr/Crp | Oxygen                                     | 8846791            | -        |
| <b>Fur</b>  | 49  | 36  | 33  | 50  | 7  | 4  | 38 | 28  | 22  | 21 | 15 | <b>M</b>   | Iron metabolism                              | Fur     | Iron ion, (Fe2+)                           | 10400588           | -        |
| <b>GabR</b> | 3   | 3   | 4   | 4   | 0  | 0  | 0  | 0   | 0   | 0  | 0  | <b>A</b>   | Gamma-aminobutyrate utilization              | GntR    | Pyridoxal-5-phosphate; Gamma-aminobutyrate | 15223311           | -        |
| <b>GlnL</b> | 2   | 2   | 4   | 1   | 0  | 0  | 4  | 2   | 0   | 0  | 0  | <b>A</b>   | Glutamine/Aspartate utilization              | GlnL    | GlnK, sensor histidine kinase (glutamine)  | -                  | -        |
| <b>GlnR</b> | 6   | 5   | 3   | 3   | 3  | 16 | 4  | 0   | 0   | 2  | 7  | <b>A</b>   | Nitrogen assimilation                        | MerR    | Feedback-inhibited GlnA, glutamine         | 18195355           | 17086994 |
| <b>GltC</b> | 3   | 3   | 3   | 3   | 3  | 3  | 0  | 0   | 0   | 0  | 0  | <b>A</b>   | Glutamate metabolism                         | LysR    | 2-oxoglutarate; Glutamate; Glutamine       | 17134717; 17608797 | -        |
| <b>GntR</b> | 4   | 0   | 0   | 4   | 0  | 0  | 0  | 0   | 0   | 3  | 0  | <b>C</b>   | Gluconate utilization                        | GntR    | D-gluconate; D-glucono-delta-lactone       | 2492998            | -        |
| <b>GutR</b> | 3   | 3   | 0   | 0   | 0  | 0  | 0  | 0   | 0   | 0  | 0  | <b>C</b>   | Sorbitol utilization                         | GutR    | Sorbitol                                   | 11118449           | -        |
| <b>HrcA</b> | 5   | 5   | 5   | 5   | 5  | 5  | 5  | 6   | 6   | 6  | 6  | <b>R</b>   | Heat shock response                          | HrcA    | Heat shock                                 | 12486078           | -        |
| <b>HxIR</b> | 2   | 2   | 2   | 2   | 0  | 0  | 0  | 0   | 0   | 2  | 2  | <b>C</b>   | Ribulose monophosphate pathway               | HxIR    | -                                          | -                  | -        |
| <b>IoIR</b> | 12  | 12  | 0   | 12  | 0  | 0  | 0  | 0   | 10  | 0  | 0  | <b>C</b>   | Inositol utilization                         | DeoR    | 2-deoxy-5-keto-D-gluconate 6-phosphate     | 18310071           | -        |
| <b>KdgR</b> | 6   | 0   | 5   | 6   | 0  | 0  | 0  | 0   | 0   | 0  | 0  | <b>C</b>   | Pectin utilization                           | Lacl    | 2-keto-3-deoxy-gluconate                   | -                  | -        |
| <b>LevR</b> | 5   | 0   | 0   | 5   | 0  | 0  | 0  | 0   | 0   | 0  | 0  | <b>C</b>   | Levan utilization                            | LevR    | -                                          | -                  | -        |
| <b>LexA</b> | 49  | 42  | 34  | 32  | 29 | 18 | 15 | 21  | 20  | 24 | 15 | <b>R</b>   | SOS response                                 | LexA    | DNA damage                                 | 9045831            | 12137951 |
| <b>LiaR</b> | 6   | 6   | 6   | 6   | 5  | 5  | 5  | 6   | 5   | 5  | 3  | <b>R</b>   | Cell wall-active antibiotics stress response | LuxR    | LiaS, sensor histidine kinase (bacitracin) | 15273097           | 16816187 |
| <b>LicR</b> | 4   | 4   | 4   | 0   | 0  | 0  | 0  | 0   | 5   | 5  | 0  | <b>C</b>   | Beta-glucosides utilization                  | BglG    | LicB, lichenan-specific enzyme IIB         | 10438772           | -        |
| <b>LmrA</b> | 5   | 2   | 0   | 0   | 0  | 0  | 0  | 0   | 0   | 0  | 0  | <b>R</b>   | Multidrug resistance                         | TetR    | Quercetin; Fisetin; Ccatechin              | 17483215           | -        |
| <b>MalR</b> | 4   | 3   | 3   | 3   | 0  | 0  | 0  | 0   | 0   | 0  | 0  | <b>C</b>   | Malate utilization                           | CitB    | YufL, sensor histidine kinase (malate)     | -                  | -        |

|           |     |     |     |     |     |     |     |     |     |     |     |   |                                         |      |                                     |                   |
|-----------|-----|-----|-----|-----|-----|-----|-----|-----|-----|-----|-----|---|-----------------------------------------|------|-------------------------------------|-------------------|
| MhqR      | 7   | 7   | 5   | 6   | 3   | 1   | 6   | 0   | 3   | 3   | 4   | R | 2-Methylhydroquinone and catechol resi  | MarR | -                                   |                   |
| MntR      | 5   | 1   | 4   | 1   | 4   | 1   | 4   | 3   | 4   | 4   | 4   | M | Manganase transport                     | DtxR | Manganase ion, (Mn2+)               | 10760146          |
| NagR      | 4   | 4   | 4   | 5   | 0   | 3   | 3   | 4   | 2   | 1   | 0   | C | N-acetylglucosamine utilization         | GntR | N-acetylglucosamine-phosphate       | 20047956          |
| NiaR      | 6   | 6   | 3   | 6   | 5   | 6   | 6   | 6   | 6   | 0   | 0   | O | NAD biosynthesis                        | NiaR | Niacine                             | 18276644 18276644 |
| OhrR      | 1   | 1   | 1   | 1   | 0   | 1   | 2   | 0   | 0   | 2   | 3   | R | Peroxide stress response                | MarR | tert-Butyl hydroperoxide; Diamide;  | 11983871          |
| PadR      | 3   | 2   | 2   | 1   | 0   | 0   | 0   | 0   | 0   | 0   | 0   | R | Phenolic acid stress response           | PadR | p-coumaric acid; Ferulic acid       | 21685295          |
| PerR      | 15  | 18  | 11  | 17  | 12  | 10  | 17  | 11  | 9   | 15  | 13  | R | Oxidative stress response; Peroxide str | Fur  | Hydrogen peroxide; Manganese ion    | 19508286          |
| PurR      | 24  | 24  | 26  | 27  | 19  | 22  | 21  | 25  | 26  | 22  | 7   | N | Purine metabolism                       | PurR | 5-phosphoribosyl 1-pyrophosphate    | 7638212           |
| PutR      | 4   | 4   | 3   | 4   | 0   | 0   | 0   | 0   | 0   | 0   | 0   | A | Proline utilization                     | SrmR | Proline                             | 21840319          |
| QdoR      | 5   | 2   | 1   | 2   | 0   | 0   | 0   | 0   | 0   | 0   | 0   | R | Multidrug resistance                    | TetR | Quercetin; Fisetin; Tamarixetin; Ga | 17483215          |
| Rex       | 10  | 8   | 9   | 12  | 9   | 3   | 8   | 2   | 3   | 8   | 7   | P | Anaerobic metabolism                    | Rex  | NADH                                | 17015645 22210771 |
| RocR      | 7   | 7   | 3   | 4   | 0   | 5   | 1   | 5   | 2   | 0   | 0   | A | Arginine degradation; Ornithine degrada | Fis  | Ornithine; Citrulline               | -                 |
| SdpR      | 2   | 0   | 0   | 2   | 2   | 2   | 2   | 2   | 2   | 0   | 2   | S | SdpC antitoxin system involved in sporu | ArsR | Sdpl, signal transduction protein   | 16469701          |
| SinR      | 19  | 19  | 17  | 19  | 0   | 0   | 0   | 3   | 0   | 0   | 0   | S | Biofilm formation                       | Xre  | SinI, antirepressor protein         | 20652907          |
| TnrA      | 106 | 85  | 49  | 63  | 27  | 32  | 0   | 50  | 61  | 27  | 70  | A | Nitrogen assimilation                   | MerR | Feedback-inhibited GlnA, glutamine  | 21435182 17086994 |
| TreR      | 3   | 3   | 3   | 3   | 3   | 3   | 2   | 3   | 2   | 0   | 0   | C | Trehalose utilization                   | GntR | Trehalose-6-phosphate               | 8755887           |
| XylR      | 5   | 5   | 5   | 10  | 0   | 8   | 0   | 12  | 6   | 7   | 3   | C | Xylose utilization                      | ROK  | Xylose                              | 7966270 11750820  |
| YdfI      | 1   | 1   | 0   | 1   | 0   | 0   | 0   | 0   | 0   | 0   | 0   | R | Metabolite transport                    | LuxR | -                                   | -                 |
| YetL      | 2   | 2   | 0   | 0   | 0   | 0   | 0   | 0   | 0   | 0   | 0   | R | Flavonoids response                     | MarR | Flavonoids                          | -                 |
| YodB/CatR | 6   | 5   | 6   | 8   | 2   | 0   | 7   | 5   | 0   | 3   | 5   | R | Oxidative stress response               | HxlR | Quinone; Diamide                    | 20652907          |
| YtlI      | 13  | 10  | 0   | 0   | 0   | 0   | 0   | 0   | 0   | 0   | 0   | A | L-cystine transporter                   | LysR | -                                   | -                 |
| YtrA      | 7   | 7   | 5   | 5   | 3   | 3   | 4   | 0   | 0   | 0   | 0   | R | Ramoplanin resistance                   | GntR | Acetoin                             | 21856850          |
| Zur       | 10  | 8   | 8   | 10  | 5   | 3   | 5   | 9   | 10  | 7   | 8   | M | Zinc homeostasis                        | Fur  | Zink ion, (Zn2+)                    | 9811636 12904577  |
|           | 953 | 776 | 613 | 801 | 356 | 348 | 393 | 494 | 445 | 402 | 346 |   | Number of regulated genes               |      |                                     |                   |
|           | 131 | 108 | 91  | 115 | 45  | 55  | 61  | 65  | 60  | 59  | 52  |   | Number of regulons                      |      |                                     |                   |

\*Functional classes: P - respiration; F - fatty acid metabolism; A - amino acid metabolism; R - stress response and drug resistance; C - carbon metabolism;

S - sporulation, social behavior and competence; M - metal homeostasis; N - nucleic bases metabolism; O - cofactor metabolism; I - miscellaneous; U - unknown
