# Supplementary material
Source: PubMed Central journal article supplement (PMC3676070)
Supplement: JB.00140-13_zjb999092590so4.pdf [file JB.00140-13_zjb999092590so4.pdf]

**Table S3. Content of reconstructed TF and RNA regulons in the Bacillales.**

| Regulon name <sup>1</sup> / Target regulated operons | TF locus tag / Locus tag for a target operon | Bacillus subtilis sstr. 168 | Bacillus amyloqueliefaciens FZB42 | Bacillus pumilus SAFR-032 | Bacillus licheniformis DSM 13 | Anoxybacillus flavithermus WK1 | Geobacillus kaustophilus HTA426 | Bacillus cereus ATCC 14579 | Bacillus halodurans C-125 | Bacillus clausii KSM-K16 | Oceanobacillus iheyensis HTE831 | Paenibacillus sp. JDR-2 | Regulated Metabolic pathway or Biological process / Functional role of a target operon | Experimental Evidence Reference (NCBI PMID) |
|------------------------------------------------------|----------------------------------------------|-----------------------------|-----------------------------------|---------------------------|-------------------------------|--------------------------------|---------------------------------|----------------------------|---------------------------|--------------------------|---------------------------------|-------------------------|----------------------------------------------------------------------------------------|---------------------------------------------|
|                                                      |                                              |                             |                                   |                           |                               |                                |                                 |                            |                           |                          |                                 |                         |                                                                                        |                                             |
| <b>TF regulons</b>                                   |                                              |                             |                                   |                           |                               |                                |                                 |                            |                           |                          |                                 |                         |                                                                                        |                                             |
| <b>HrcA regulon</b>                                  | <b>hrcA</b>                                  | +                           | +                                 | +                         | +                             | +                              | +                               | +                          | +                         | +                        | +                               | +                       | <b>Heat-shock</b>                                                                      |                                             |
| <i>hrcA-grpE-dnaK</i>                                | BSU25490                                     | +                           | +                                 | +                         | +                             | +                              | +                               | +                          | +                         | +                        | +                               | +                       | Heat-shock response (chaperons)                                                        | exp. 8113175                                |
| <i>groES-groEL</i>                                   | BSU06020                                     | +                           | +                                 | +                         | +                             | +                              | +                               | +                          | +                         | +                        | +                               | +                       | Heat-shock response (chaperons)                                                        | exp. 8576042                                |
| <i>htpG</i>                                          | BH1007                                       | -                           | -                                 | -                         | -                             | 0                              | 0                               | 0                          | +                         | +                        | +                               | +                       | Heat-shock response (chaperons)                                                        | -                                           |
| <b>LexA regulon</b>                                  | <b>lexA</b>                                  | +                           | +                                 | +                         | +                             | +                              | +                               | +                          | +                         | +                        | +                               | +                       | <b>SOS regulon</b>                                                                     |                                             |
| <i>lexA</i>                                          | BSU17850                                     | +                           | +                                 | +                         | +                             | +                              | +                               | +                          | +                         | +                        | +                               | +                       | SOS regulon repressor                                                                  | exp. 9555905                                |
| <i>yneAB-ynzC-ktk-yneEF</i>                          | BSU17870                                     | +                           | +                                 | +                         | +                             | +                              | +                               | +                          | +                         | +                        | +                               | 0                       | ABC transport protein, sugar-binding component yneA; site-specific                     | exp. 16267290                               |
| <i>uvrBA</i>                                         | BSU35170                                     | +                           | +                                 | +                         | +                             | +                              | +                               | +                          | +                         | +                        | +                               | -                       | Excinuclease ABC subunits B, A                                                         | exp. 16267290                               |
| <i>yqjW</i>                                          | BSU23710                                     | +                           | +                                 | +                         | -                             | 0                              | 0                               | 0                          | +                         | +                        | 0                               | +                       | DNA polymerase IV                                                                      | exp. 16267290                               |
| <i>dnaE-ytsJ</i>                                     | BSU29230                                     | +                           | +                                 | +                         | +                             | -                              | -                               | -                          | -                         | -                        | +                               | -                       | DNA polymerase III, alpha subunit; Malate dehydrogenase                                | exp. 16267290                               |
| <i>pcrA-ligA-yerH</i>                                | BSU06610                                     | +                           | +                                 | +                         | +                             | -                              | -                               | -                          | -                         | -                        | -                               | -                       | ATP-dependent DNA helicase; NAD-dependent DNA ligase; Putative                         | exp. 16267290                               |
| <i>parEC</i>                                         | BSU18090                                     | +                           | +                                 | +                         | -                             | +                              | +                               | +                          | +                         | +                        | +                               | +                       | DNA topoisomerase IV subunit B; DNA topoisomerase IV subunit A                         | exp. 16267290                               |
| <i>uvrC</i>                                          | BSU28490                                     | +                           | +                                 | +                         | -                             | -                              | -                               | +                          | -                         | -                        | -                               | +                       | Excinuclease ABC subunit C                                                             | exp. 16267290                               |
| <i>yhjD</i>                                          | BSU10470                                     | +                           | +                                 | +                         | +                             | 0                              | 0                               | 0                          | +                         | 0                        | +                               | +                       | Unknown conserved protein                                                              | exp. 16267290                               |
| <i>recA</i>                                          | BSU16940                                     | +                           | +                                 | +                         | +                             | -                              | +                               | +                          | +                         | +                        | +                               | +                       | Recombination protein A                                                                | exp. 9555905                                |
| <i>addBA</i>                                         | BC1137                                       | -                           | -                                 | -                         | -                             | -                              | +                               | +                          | 0                         | 0                        | +                               | +                       | ATP-dependent nuclease, subunit B, subunitA                                            | -                                           |
| <i>hupA</i>                                          | BSU22790                                     | +                           | +                                 | +                         | +                             | -                              | -                               | -                          | -                         | -                        | -                               | -                       | DNA-binding protein HBSu                                                               | -                                           |
| <i>ytrHI</i>                                         | BSU29239                                     | +                           | +                                 | +                         | +                             | -                              | -                               | -                          | -                         | -                        | -                               | -                       | Sporulation membrane proteins                                                          | -                                           |
| <i>sda</i>                                           | BSU25690                                     | +                           | +                                 | +                         | +                             | +                              | +                               | -                          | +                         | -                        | 0                               | -                       | Sporulation inhibitor                                                                  | exp. 16267290                               |
| <i>BPUM_2882</i>                                     | BPUM_2882                                    | 0                           | 0                                 | +                         | +                             | 0                              | 0                               | 0                          | +                         | 0                        | 0                               | 0                       | Hypothetical protein                                                                   | -                                           |
| <i>xkdA</i>                                          | BSU12500                                     | +                           | +                                 | +                         | +                             | +                              | +                               | 0                          | 0                         | 0                        | +                               | 0                       | Phage-like element PBSX protein                                                        | exp. 16267290                               |
| <i>yoiD-uvrX</i>                                     | BSU21510                                     | +                           | -                                 | 0                         | +                             | 0                              | 0                               | 0                          | 0                         | 0                        | 0                               | 0                       | Hypothetical protein; UV-damage repair protein                                         | exp. 16267290                               |
| <i>yqhHG</i>                                         | BSU24580                                     | +                           | +                                 | -                         | -                             | +                              | -                               | -                          | -                         | -                        | +                               | -                       | Uncharacterized ATP-dependent helicase, SNF2 family                                    | -                                           |
| <i>vsr</i>                                           | Pjdr2_4666                                   | 0                           | 0                                 | 0                         | 0                             | 0                              | 0                               | 0                          | 0                         | 0                        | -                               | +                       | DNA mismatch endonuclease Vsr                                                          | -                                           |
| <i>ruvAB</i>                                         | BSU27740                                     | +                           | +                                 | +                         | +                             | -                              | +                               | +                          | -                         | +                        | +                               | +                       | Holliday junction DNA helicase motor protein; Holliday junction DNA                    | exp. 16267290                               |
| <i>dinB</i>                                          | BSU05630                                     | +                           | +                                 | 0                         | 0                             | 0                              | 0                               | 0                          | 0                         | 0                        | 0                               | 0                       | Nuclease inhibitor                                                                     | exp. 16267290                               |

|                     |                   |                         |                                                                                    |               |
|---------------------|-------------------|-------------------------|------------------------------------------------------------------------------------|---------------|
| <i>ykvR</i>         | BSU13800          | + + 0 0 0 0 0 0 0 0 - 0 | Hypothetical protein                                                               | exp. 16267290 |
| <i>aprX</i>         | BSU17260          | + + - - 0 - 0 - 0 - -   | Alkaline serine protease                                                           | exp. 16267290 |
| <i>ypuD</i>         | BSU23300          | + + + + 0 0 0 0 0 0 0   | Hypothetical protein                                                               | exp. 16267290 |
| <i>tagC</i>         | BSU35770          | + 0 0 0 0 0 0 0 0 0 0   | Polyglycerol phosphate assembly and export                                         | exp. 8969214  |
| <i>ybaK-cwID</i>    | BSU01520          | + - - - - - - - - -     | Hypothetical protein; N-acetylmuramoyl-L-alanine amidase                           | exp. 16267290 |
| <i>uvrX</i>         | OB1361            | 0 0 0 0 0 0 0 0 0 0 + 0 | DNA-damage repair protein                                                          | -             |
| <b>Rex regulon</b>  | <b>rex (ydiH)</b> | + + + + + + + + + + +   | <b>Anaerobic metabolism</b>                                                        | -             |
| <i>ldh-ictP</i>     | BSU03050          | + + + + + + + + + + 0   | L-lactate dehydrogenase; L-lactate permease                                        | exp. 16207915 |
| <i>yjIC-ndh</i>     | BSU12280          | + + 0 + 0 0 - 0 0 0 +   | Hypothetical protein; NADH dehydrogenase                                           | exp. 16207915 |
| <i>cydABCD-yxkO</i> | BSU38760          | + + + - 0 0 - - 0 - 0   | Cytochrome bd ubiquinol oxidase (subunit I); cytochrome bd ubiquinol oxidase       | exp. 16207915 |
| <i>yumB</i>         | BSU32100          | - - - + + + - - - - +   | NADH dehydrogenase, paralog yjID                                                   | -             |
| <i>ywcJ</i>         | BSU38060          | + 0 0 + 0 0 + 0 0 0 0   | Formate/nitrate family transporter                                                 | exp. 16207915 |
| <i>pflBA</i>        | BLi02132          | 0 0 + 0 + 0 + 0 0 0 -   | Pyruvate-formate lyase; Pyruvate-formate lyase-activating enzyme                   | -             |
| <i>yndGHJ</i>       | BPUM_1837         | - - + + 0 0 + 0 0 - -   | Hypothetical protein                                                               | -             |
| <i>adh</i>          | BLi04290          | 0 0 0 + + 0 + 0 0 0 0   | Alcohol dehydrogenase                                                              | -             |
| ABC1842             | ABC1842           | 0 0 0 0 0 0 0 0 + + 0   | NADH dehydrogenase                                                                 | -             |
| <i>qoxABCD</i>      | Aflv_0272         | - + - - + - + + - + 0   | Cytochrome aa3 quinol oxidase                                                      | -             |
| <i>ydbl</i>         | BSU04480          | + + - - 0 0 0 0 0 0 0   | Hypothetical protein                                                               | -             |
| OB2241-putP         | OB2241            | 0 0 0 0 0 0 0 0 0 + 0   | Pantothenate permease                                                              | -             |
| <i>nadABC</i>       | Pjdr2_0068        | - - - - - - - - - 0 +   | NAD biosynthesis                                                                   | -             |
| <i>nasA</i>         | BLi00365          | - - 0 + 0 - 0 0 - 0 0   | Nitrate transporter                                                                | -             |
| <i>adh2</i>         | BC2220            | 0 - 0 0 0 0 + 0 0 0 0   | Alcohol dehydrogenase                                                              | -             |
| <i>nirS</i>         | GK0767            | 0 0 0 0 0 + 0 0 0 0 0   | Nitrate reductase                                                                  | -             |
| <i>naoX</i>         | Pjdr2_2160        | 0 0 0 0 0 0 0 0 0 0 +   | FAD-dependent pyridine nucleotide-disulphide oxidoreductase                        | -             |
| <i>coxAB</i>        | OB1745            | 0 0 0 0 - - 0 - 0 + 0   | Cytochrome c oxidase (b(o/a)3-type) chain II; Cytochrome c oxidase                 | -             |
| <b>Fnr regulon</b>  | <b>fnr</b>        | + + 0 + + + + + 0 0 +   | <b>Anaerobic metabolism</b>                                                        | -             |
| <i>narK-fnr</i>     | BSU37320          | + + 0 + - - + - - 0 -   | Nitrite extrusion protein; transcriptional regulator (FNR/CRP family)              | exp. 16428414 |
| <i>narGHJI</i>      | BSU37280          | + + - + 0 - - 0 - 0 0   | Nitrate reductase                                                                  | exp. 16428414 |
| <i>arfM</i>         | BSU37290          | + + 0 + 0 0 0 + 0 0 0   | Anaerobic respiration and fermentation modulator                                   | exp. 11698370 |
| <i>ldh-ictP</i>     | BSU03050          | + + - + - + + + - - 0   | L-lactate dehydrogenase; L-lactate permease                                        | -             |
| <i>naoX</i>         | Pjdr2_2160        | 0 0 0 0 0 0 0 0 0 0 +   | FAD-dependent pyridine nucleotide-disulphide oxidoreductase                        | -             |
| <i>ywcJ</i>         | BSU38060          | + 0 0 + 0 0 0 0 0 0 0   | Formate/nitrate family transporter                                                 | -             |
| <i>adh</i>          | BLi04290          | 0 0 0 + - 0 + 0 0 0 0   | Alcohol dehydrogenase                                                              | -             |
| <i>coxAB</i>        | BH0740            | 0 0 0 0 - - 0 + 0 - 0   | Transcriptional regulator (Crp family, AMP-binding protein; nitric oxide synthase) | -             |
| <b>LicR regulon</b> | <b>licR</b>       | + + + + 0 0 + 0 + + 0   | <b>Betta-glucosides metabolism</b>                                                 | -             |
| <i>licBCAH</i>      | BSU38590          | + + + - 0 0 - 0 + + 0   | Beta-glucosides-specific PTS system; 6-phospho-beta-glucosidase                    | exp. 10438772 |
| <i>licR</i>         | BSU38600          | - - - - 0 0 - 0 + + 0   | Transcriptolan regulator of beta-glucosides utilization operon                     | -             |
| <b>ManR regulon</b> | <b>manR</b>       | + + 0 + 0 0 0 0 0 0 0   | <b>Mannose utilization</b>                                                         | -             |

|                                            |             |   |   |   |   |   |   |   |   |   |   |   |                                                                       |                              |              |
|--------------------------------------------|-------------|---|---|---|---|---|---|---|---|---|---|---|-----------------------------------------------------------------------|------------------------------|--------------|
| <i>manR</i>                                | BSU12000    | + | + | 0 | - | 0 | 0 | 0 | 0 | 0 | 0 | 0 | Transcriptolan regulator of mannose utilization operon                | exp. 20139185                |              |
| <i>manPA</i>                               | BSU12010    | + | + | 0 | + | 0 | 0 | 0 | 0 | 0 | 0 | 0 | Mannose utilization                                                   | exp. 20139185                |              |
| <b>MtlR regulon</b>                        | <b>mtlR</b> | + | + | + | + | + | + | 0 | + | + | + | + | <b>Mannitol utilization</b>                                           | -                            |              |
| <i>mtlAFD</i>                              | BSU03981    | + | + | + | + | + | + | 0 | + | - | + | + | Mannitol utilization                                                  | exp. 20444094                |              |
| <i>mtlR</i>                                | BSU04160    | + | + | + | - | + | + | 0 | + | - | + | + | Transcriptolan regulator of mannitol utilization operon               | -                            |              |
| <b>BirA regulon</b>                        | <b>birA</b> | + | + | + | + | + | + | + | + | + | + | + | <b>Biotin methabolism</b>                                             | -                            |              |
| <i>bioWAFDBI</i>                           | BSU30240    | + | + | + | + | + | + | + | + | 0 | 0 | + | Biotin biosynthesis                                                   | exp. 8892842                 |              |
| <i>bioY2-yhfts</i>                         | BSU10370    | + | + | + | + | 0 | 0 | + | 0 | + | + | + | Biotin ECF transporter; Long-chain-fatty-acid--CoA ligase; 3-ketoacyl | -                            |              |
| <i>bioY1</i>                               | BSU32030    | + | + | + | + | + | + | + | + | + | + | 0 | Biotin ECF transporter                                                | -                            |              |
| <b>FruR regulon</b>                        | <b>fruR</b> | + | + | + | + | + | + | + | + | + | + | 0 | <b>Fructose methabolism</b>                                           | -                            |              |
| <i>fruRKA</i>                              | BSU14380    | + | + | + | + | + | + | + | + | + | + | 0 | Fructose utilization                                                  | -                            |              |
| <b>TreR regulon</b>                        | <b>treR</b> | + | + | + | + | + | + | + | + | + | + | 0 | 0                                                                     | <b>Trehalose utilization</b> | -            |
| <i>trePAR</i>                              | BSU07800    | + | + | + | + | + | + | + | + | + | + | 0 | 0                                                                     | Trehalose utilization        | exp. 8755887 |
| <b>GntR regulon</b>                        | <b>gntR</b> | + | 0 | 0 | + | 0 | 0 | 0 | 0 | 0 | + | 0 | <b>D-gluconate utilization</b>                                        | -                            |              |
| <i>gntRKPZ</i>                             | BSU40050    | + | 0 | 0 | + | 0 | 0 | 0 | 0 | 0 | + | 0 | Gluconate utilization                                                 | exp. 7476858                 |              |
| <b>YtrA regulon</b>                        | <b>ytrA</b> | + | + | + | + | + | + | + | 0 | 0 | 0 | 0 | <b>Ramoplanin resistance</b>                                          | -                            |              |
| <i>ytrABC</i>                              | BSU30460    | + | + | + | + | + | + | + | 0 | 0 | 0 | 0 | ABC efflux transporter; induced by Ramoplanin antibiotic              | exp. 10986249                |              |
| <i>ywoBCD</i>                              | BSU36500    | + | 0 | 0 | 0 | 0 | 0 | 0 | 0 | 0 | 0 | 0 | Hypothetical transmembrane protein, drug resistance transporter       | -                            |              |
| <i>ytrEF</i>                               | BSU30420    | + | + | + | + | 0 | 0 | 0 | 0 | 0 | 0 | 0 | ABC efflux transporter; induced by Ramoplanin antibiotic              | exp. 10986249                |              |
| <b>ExuR regulon</b>                        | <b>exuR</b> | + | + | + | + | 0 | 0 | 0 | 0 | 0 | 0 | 0 | <b>Hexuronate utilization</b>                                         | -                            |              |
| <i>uxaC--exuM-yjmCD-uxuA-yjmF-exuTR-ux</i> | BSU12300    | + | + | + | + | 0 | 0 | 0 | 0 | 0 | 0 | 0 | Hexuronate utilization                                                | exp. 9882655                 |              |
| <b>LacR (GanR) regulon</b>                 | <b>ganR</b> | + | 0 | + | + | 0 | 0 | 0 | + | + | 0 | 0 | <b>Galactan utilization</b>                                           | -                            |              |
| <i>ganR</i>                                | BSU34170    | + | 0 | + | + | 0 | 0 | 0 | - | - | 0 | 0 | Transcriptolan regulator of galactan utilization operon               | -                            |              |
| <i>cycB-ganPQAB</i>                        | BSU34160    | + | 0 | + | + | - | 0 | 0 | + | + | 0 | 0 | Cyclodextrin ABC transporter; beta-1,4-galactooligomerase; arabinog   | exp. 9287030                 |              |
| <b>NtdR regulon</b>                        | <b>ntdR</b> | + | 0 | + | + | 0 | 0 | 0 | 0 | 0 | 0 | 0 | <b>Neotrehalosadiamine utilization</b>                                | -                            |              |
| <i>ntdABC</i>                              | BSU10550    | + | 0 | + | + | 0 | 0 | 0 | 0 | 0 | 0 | 0 | NTD biosynthesis                                                      | exp. 14612444                |              |
| <i>ntdR</i>                                | BSU10560    | + | 0 | + | + | 0 | 0 | 0 | 0 | 0 | 0 | 0 | NTD biosynthesis operon regulator                                     | -                            |              |
| <b>GlvR regulon</b>                        | <b>glvR</b> | + | + | 0 | + | 0 | 0 | 0 | 0 | 0 | 0 | 0 | <b>Maltose utilization</b>                                            | -                            |              |
| <i>glvARC</i>                              | BSU08180    | + | + | 0 | + | 0 | 0 | 0 | 0 | 0 | 0 | 0 | Maltose utilization                                                   | exp. 11489864                |              |
| <b>CggR regulon</b>                        | <b>cggR</b> | + | + | + | + | + | + | + | + | + | + | + | <b>Fructose-1,6-bisphosphate metabolism</b>                           | -                            |              |
| <i>cggR-gapA-pgk-tpiA-pgm-eno</i>          | BSU33950    | + | + | + | + | + | + | + | + | + | + | + | Glycolysis                                                            | exp. 12622823                |              |
| <b>ArgR regulon</b>                        | <b>argR</b> | + | + | + | + | + | + | + | + | + | + | + | <b>Arginine metabolism</b>                                            | -                            |              |
| <i>argCJBD-carAB-argF</i>                  | BSU11190    | + | + | + | + | + | + | + | + | + | + | + | Arginine biosynthesis                                                 | exp. 7565595                 |              |
| <i>argGH</i>                               | BSU29450    | + | + | + | + | + | + | + | + | + | + | + | Arginine biosynthesis                                                 | -                            |              |
| <i>Aflv_0223</i>                           | Aflv_0223   | 0 | 0 | 0 | 0 | + | + | + | 0 | 0 | 0 | + | Amino acid acetyltransferase (GNAT family)                            | -                            |              |
| <i>artPQM</i>                              | BSU23980    | + | + | + | + | 0 | 0 | + | + | 0 | 0 | - | Arginine ABC transporter                                              | -                            |              |
| <i>arcABDC</i>                             | BLi04163    | 0 | 0 | 0 | + | 0 | 0 | + | 0 | 0 | 0 | 0 | Arginine catabolism                                                   | -                            |              |
| <i>rocABC</i>                              | BSU37780    | + | - | - | - | - | - | + | - | - | + | - | Arginine utilization                                                  | exp. 7565595                 |              |

|                                  |             |   |   |   |   |   |   |   |   |   |   |   |                                                                                   |               |
|----------------------------------|-------------|---|---|---|---|---|---|---|---|---|---|---|-----------------------------------------------------------------------------------|---------------|
| <i>rocDEF</i>                    | BSU40340    | + | - | + | - | - | - | - | - | - | + | - | Arginine utilization                                                              | exp. 9383188  |
| <b>Fur regulon</b>               | <b>fur</b>  | + | + | + | + | + | + | + | + | + | + | + | <b>Iron metabolism</b>                                                            | -             |
| <i>ykuNOP</i>                    | BSU14150    | + | + | + | + | + | 0 | + | 0 | + | 0 | + | Flavodoxin; BNR repeat domain protein; Flavodoxin; 2,3,4,5-tetrahydro             | exp. 12354229 |
| <i>yfhC</i>                      | BSU08480    | + | + | + | + | 0 | 0 | + | + | + | + | - | Nitroreductase                                                                    | exp. 12354229 |
| <i>yusV</i>                      | BSU32940    | + | + | + | + | + | - | + | 0 | + | + | + | Iron(III) dicitrate transport ATP-binding protein (TC 3.A.1.14.1)                 | exp. 12354229 |
| <i>yclNOPQ</i>                   | BSU03800    | + | + | + | + | 0 | 0 | + | + | + | + | 0 | Ferrichrome ABC transporter                                                       | exp. 12354229 |
| <i>yfiZ-yfhA</i>                 | BSU08450    | + | 0 | 0 | + | + | + | 0 | 0 | 0 | 0 | + | ABC-type Fe <sup>3+</sup> -siderophore transport system, permease component       | exp. 12354229 |
| <i>yfiY</i>                      | BSU08440    | + | 0 | + | 0 | 0 | 0 | 0 | + | 0 | 0 | + | ABC-type Fe <sup>3+</sup> -siderophore transport system, periplasmic iron-binding | exp. 12354229 |
| <i>feuABC-ybbA</i>               | BSU01630    | + | + | + | + | 0 | 0 | + | 0 | + | + | + | Fe-bacillibactin transport system; Trilactonehydrolase                            | exp. 12354229 |
| <i>fhuBGC</i>                    | BSU33310    | + | + | + | + | + | + | + | + | + | + | + | Ferrichrome transport system permease protein; Ferrichrome transp                 | exp. 12354229 |
| <i>fhuD</i>                      | BSU33320    | + | + | + | + | 0 | 0 | 0 | 0 | 0 | 0 | + | Ferrichrome ABC superfamily ATP binding cassette transporter, bind                | exp. 12354229 |
| <i>asbABCDEF</i>                 | BC1978      | 0 | 0 | 0 | 0 | 0 | 0 | + | 0 | + | 0 | 0 | Anthrachelin biosynthesis                                                         | -             |
| <i>sidABCDEFG</i>                | BH2624      | 0 | 0 | + | + | 0 | 0 | 0 | + | 0 | 0 | 0 | Siderophore biosynthesis                                                          | -             |
| <i>yetG</i>                      | BSU07150    | + | 0 | 0 | 0 | 0 | 0 | 0 | + | + | 0 | 0 | Antibiotic biosynthesis monooxygenase domain containing protein                   | exp. 21873409 |
| <i>ycgT</i>                      | BSU03270    | + | + | + | + | + | - | + | + | + | + | + | Thioredoxin reductase                                                             | exp. 12354229 |
| <i>dhbACEBF</i>                  | BSU32000    | + | + | + | + | 0 | 0 | 0 | 0 | 0 | + | 0 | Siderophore biosynthesis                                                          | exp. 12354229 |
| <i>fbpC (mgrC ypbR upstream)</i> | BSU22030 (u | + | + | + | + | 0 | 0 | 0 | 0 | 0 | 0 | 0 | Fur-regulated basic proteins                                                      | exp. 18697947 |
| <i>fbpAB (ydbN)</i>              | BSU04530    | + | + | + | + | 0 | 0 | 0 | 0 | 0 | 0 | 0 | Fur-regulated basic proteins                                                      | exp. 18697947 |
| <i>yxeB</i>                      | BSU39610    | + | + | 0 | + | 0 | 0 | 0 | 0 | + | + | + | Fe <sup>3+</sup> -hydroxamate ABC transporter substrate-binding protein           | exp. 12354229 |
| <i>ywjAB</i>                     | BSU37230    | + | + | + | 0 | 0 | 0 | + | 0 | 0 | 0 | + | Multidrug resistance ABC transporter ATP-binding and permease pro                 | exp. 12354229 |
| <i>nikABCDE</i>                  | BLi02811    | 0 | 0 | + | + | 0 | 0 | 0 | + | 0 | 0 | 0 | Nickel transport system (nickel-binding protein); nickel transport syste          | -             |
| <i>feoAB</i>                     | BLi04266    | 0 | 0 | 0 | + | + | - | + | 0 | 0 | 0 | 0 | Fe <sup>2+</sup> transport system protein A                                       | -             |
| <i>yhfQ</i>                      | BSU10330    | + | + | 0 | + | 0 | 0 | 0 | 0 | 0 | 0 | + | Heme ABC type transporter                                                         | exp. 12354229 |
| <i>efeUOB (ywbLMN)</i>           | BSU38280    | + | 0 | 0 | 0 | 0 | 0 | 0 | 0 | 0 | 0 | + | Ferrous iron transport                                                            | exp. 12354229 |
| OB3390                           | OB3390      | 0 | 0 | 0 | 0 | 0 | 0 | 0 | 0 | 0 | + | + | Iron-siderophore binding lipoprotein                                              | -             |
| <i>futC</i>                      | BH0512      | 0 | 0 | 0 | 0 | 0 | 0 | 0 | + | 0 | 0 | 0 | Ferric iron ABC transporter, ATP-binding protein                                  | -             |
| <i>futAB</i>                     | BH0513      | 0 | 0 | 0 | 0 | 0 | 0 | 0 | + | 0 | 0 | 0 | Ferric iron ABC transporter, binding protein and permease protein                 | -             |
| <i>fer</i>                       | BSU23040    | + | + | + | 0 | + | - | + | - | - | 0 | - | Ferredoxin                                                                        | -             |
| <i>fur</i>                       | BSU23520    | - | - | - | + | - | - | + | + | - | - | + | Transcription regulator                                                           | -             |
| <i>miaB-ymcA</i>                 | BSU17010    | + | + | - | + | - | - | - | - | - | - | - | TRNA-i(6)A37 thiotransferase enzyme; Uncharacterized protein invo                 | -             |
| <i>yuil</i>                      | BSU32010    | + | + | 0 | + | 0 | 0 | 0 | 0 | 0 | 0 | + | Trilactone hydrolase [bacillibactin] siderophore                                  | exp. 12354229 |
| <i>btr</i>                       | BSU01640    | + | + | + | - | 0 | 0 | 0 | 0 | + | 0 | + | Transcriptional regulator of Fe-bacillibactin uptake, AraC family                 | exp. 12354229 |
| <i>nasEF</i>                     | BSU03290    | + | - | - | - | 0 | - | - | - | - | 0 | 0 | Assimilatory nitrite reductase (subunit); uroporphyrin-III C-methyltran           | exp. 12354229 |
| <i>yoaJ (exIX)</i>               | BSU18630    | + | 0 | 0 | + | 0 | 0 | 0 | 0 | 0 | 0 | 0 | Extracellular endoglucanase precursor                                             | exp. 12354229 |
| <i>yfmCDEF</i>                   | BSU07520    | + | 0 | 0 | 0 | 0 | 0 | + | + | + | 0 | 0 | Ferrichrome ABC transporter (binding protein)                                     | exp. 12354229 |
| <i>yumC</i>                      | BSU32110    | + | + | + | - | - | - | - | - | - | + | - | Ferredoxin--NAD(+) reductase                                                      | -             |
| <b>MntR regulon</b>              | <b>mntR</b> | + | + | + | + | + | + | + | + | + | + | + | <b>Manganese transport</b>                                                        | -             |
| <i>mntABCD</i>                   | BSU30770    | + | 0 | + | + | + | 0 | 0 | + | + | + | + | Manganese ABC transporter                                                         | exp. 10760146 |

|                            |             |                       |                                                                         |               |
|----------------------------|-------------|-----------------------|-------------------------------------------------------------------------|---------------|
| <i>mntH</i>                | BSU04360    | + + + + 0 + + 0 0 0 + | Manganese transport protein MntH                                        | exp. 10760146 |
| <i>feoAB1B2</i>            | BC0709      | 0 0 - 0 - - + 0 0 0 0 | Ferrous iron transport                                                  | -             |
| <b>Zur regulon</b>         | <b>zur</b>  | + + + + + + + + + + + | <b>Zinc transport</b>                                                   | -             |
| <i>yciC</i>                | BSU03360    | + + + + + 0 + + + + + | Putitative GTPase                                                       | exp. 9811636  |
| <i>yciAB</i>               | BSU03340    | + 0 0 + 0 0 0 + 0 - 0 | GTP cyclohydrolase I type 2; D-alanyl-D-alanine carboxypeptidase        | exp. 12426338 |
| <i>adcABC</i>              | BSU02850    | + + + + + + + + + + + | Zinc ABC transporter                                                    | exp. 9811636  |
| <i>zur</i>                 | BSU25100    | - - - - + + + + + + - | Zinc uptake regulation protein                                          | -             |
| <i>pgp</i>                 | BLi01934    | 0 0 0 + 0 0 + 0 + + 0 | Putative GTPases                                                        | -             |
| <i>rpmE2 (L31p)</i>        | BSU30700    | + + + + 0 0 - - - - 0 | 50S ribosomal protein L31 type B                                        | exp. 15049826 |
| <i>rpmGB (L33p)</i>        | BLi02553    | 0 - + + + 0 + 0 0 + 0 | 50S ribosomal protein L33 paralog                                       | -             |
| <i>rpsN2 (S14p)</i>        | BSU08880    | + - + + 0 0 + 0 0 + 0 | 30S ribosomal protein S14 paralog                                       | exp. 19648245 |
| <i>zinT</i>                | BSU26830    | + 0 0 0 0 0 0 0 + + 0 | Candidate zinc-binding lipoprotein                                      | -             |
| <b>NiaR regulon</b>        | <b>niaR</b> | + + + + + + + + + 0 0 | <b>NAD metabolism</b>                                                   | -             |
| <i>nadBCA</i>              | BSU27870    | + + + + + + + + + 0 - | Nicotinate ribonucleotide biosynthesis                                  | exp. 18276644 |
| <i>nifS-niaR</i>           | BSU27880    | + + + + + + + + + 0 0 | Cysteine desulfurase; Transcriptional repressor                         | exp. 18276644 |
| <i>niaY</i>                | BH3254      | 0 0 - 0 0 0 0 + + 0 0 | Predicted nicotinate-regulated transporter NiaY                         | -             |
| <i>niaP (ycel)</i>         | BSU02950    | + + 0 + - + + 0 0 0 - | Niacin uptake                                                           | exp. 18276644 |
| <b>PerR regulon</b>        | <b>perR</b> | + + + + + + + + + + + | <b>H2O2 stress-response</b>                                             | -             |
| <i>perR</i>                | BSU08730    | + + + + + + + + + + - | H2O2 stress-response transcriptional regulator                          | exp. 12029044 |
| <i>fur</i>                 | BSU23520    | + + + + + + + + + + + | Iron metabolism transcription regulator                                 | exp. 12029044 |
| <i>hemAXCDBL</i>           | BSU28170    | + + + + - - + + - + + | Uroporphyrinogen III biosynthesis                                       | exp. 11532148 |
| <i>ahpCF</i>               | BSU40090    | + + 0 + + + + 0 0 0 + | Alkyl hydroperoxide reductase                                           | exp. 11532148 |
| <i>zosA (ykvW)</i>         | BSU13850    | + + + + 0 0 + + + 0 - | Zinc uptake ATPase                                                      | exp. 12426338 |
| <i>czcD</i>                | Aflv_0372   | 0 0 0 0 + + 0 - 0 0 + | Co/Zn/Cd efflux system component                                        | -             |
| <i>katA</i>                | BSU08820    | + + + + 0 0 + 0 + + - | Catalase                                                                | exp. 11532148 |
| <i>ypzK</i>                | BSU23240    | - - + + - + - - 0 + 0 | GCN5-related N-acetyltransferase (GNAT) domain protein                  | -             |
| <i>spxA</i>                | BSU11500    | + + + + + + + - - + 0 | RNAP transcription regulator                                            | exp. 17158660 |
| <i>mrgA</i>                | BSU32990    | + + 0 + 0 0 0 0 0 0 0 | Non-specific DNA-binding protein Dps / Iron-binding ferritin-like antio | exp. 11532148 |
| <i>dps</i>                 | BC5044      | - - - 0 - - + 0 0 - - | Non-specific DNA-binding protein Dps                                    | -             |
| <i>yybE</i>                | RBAM_02424  | 0 + 0 + 0 0 0 0 0 0 + | HTH-transcriptional regulator                                           | -             |
| <i>Aflv_2437-Aflv_2436</i> | Aflv_2437   | 0 0 0 0 + + 0 0 0 0 0 | Hypothetical protein; Predicted Zn peptidase                            | -             |
| <i>yozi</i>                | BSU18870    | + 0 0 0 0 0 0 0 0 0 0 | Hypothetical protein                                                    | -             |
| <i>plsC</i>                | BSU09540    | - - - - 0 + - 0 0 -   | 1-acyl-sn-glycerol-3-phosphate acyltransferase                          | -             |
| <i>yoaA</i>                | OB2645      | - - - - 0 0 - - - + - | Uncharacterized N-acetyltransferase                                     | -             |
| <i>yxbB</i>                | BH1951      | 0 0 0 0 0 0 0 + 0 0 0 | Putative sugardehydrogenase                                             | -             |
| <i>OB0178</i>              | OB0178      | 0 0 0 0 0 0 0 0 0 + 0 | Hypothetical protein                                                    | -             |
| <i>trxB</i>                | Pjdr2_0784  | - - - - - - - - - +   | Thioredoxin reductase                                                   | -             |
| <i>Pjdr2_5937</i>          | Pjdr2_5937  | 0 - 0 0 0 + + 0 0 + + | Membrane protein                                                        | -             |

|                                  |             |                         |                                                                       |               |
|----------------------------------|-------------|-------------------------|-----------------------------------------------------------------------|---------------|
| <b>XylR regulon</b>              | <b>xylR</b> | + + + + 0 + 0 + + + +   | <b>Xylose metabolism</b>                                              | -             |
| <i>xylAB</i>                     | BSU17600    | + + + + 0 + 0 + + + +   | Xylose utilization                                                    | exp. 7966270  |
| <i>xylR</i>                      | BSU17590    | + + + + 0 + 0 + - + +   | Transcriptional regulator of xylose metabolism regulon                | -             |
| <i>xynPB</i>                     | BSU17570    | + + + - 0 0 0 + - + -   | Xyloside transporter; xylan 1,4-beta-xylosidase                       | exp. 9973552  |
| OB3123-OB3122-OB3121             | OB3123      | 0 0 0 0 0 0 0 + 0 + -   | Predicted beta-xyloside ABC transporter                               | -             |
| BH3678-BH3679                    | BH3678      | 0 0 0 0 0 0 0 + 0 0 -   | Sensor histidine kinase; two-component response regulator             | -             |
| <i>gunAB</i>                     | BLi01880    | 0 0 - + 0 0 0 0 0 0     | Putative endo-1,4-glucanase; putative cellulose 1,4-beta-cellobiosida | -             |
| BLi03540-BLi03541-yurM-xylS-bglI | BLi03540    | 0 0 0 + 0 0 0 0 - 0 0   | Possible xylosidase ABC transporter; Alpha-xylosidase; Beta-glucosi   | -             |
| <i>xynA</i>                      | BH2120      | 0 0 0 0 0 0 0 + 0 0 -   | Endo-1,4-beta-xylanase A                                              | -             |
| <i>xylF</i>                      | GK1881      | 0 0 0 - - + 0 0 0 0 -   | D-xylose ABC transporter (substrate-bindin protein)                   | -             |
| <b>GltC regulon</b>              | <b>gltC</b> | + + + + + + 0 0 0 0 0   | <b>Glutamate metsbolism</b>                                           | -             |
| <i>gltAB</i>                     | BSU18450    | + + + + + + 0 - - - -   | Glutamate synthase                                                    | exp. 7559359  |
| <i>gltC</i>                      | BSU18460    | + + + + + + 0 0 0 0 0   | Transcription activator                                               | exp. 7559359  |
| <b>CtsR regulon</b>              | <b>ctsR</b> | + + + + + + + + + + +   | <b>Heat-shock response</b>                                            | -             |
| <i>ctsR-mscAB-clpC-radA-disA</i> | BSU00830    | + + + + + + + + + + +   | Transcription regulator; mscB inducer; tyrosine kinase; ATPase for cl | exp. 9987115  |
| <i>clpE</i>                      | BSU13700    | + + + + - + - + + + -   | ATP-dependent Clp protease ATP-binding subunit                        | exp. 10320580 |
| <i>clpP</i>                      | BSU34540    | + + + + + + + + + + +   | ATP-dependent Clp protease proteolytic subunit                        | exp. 10320580 |
| <i>ywrO</i>                      | RBAM_03314  | - + 0 - 0 0 - 0 0 0 -   | General stress protein 14 (NAD(P)H dehydrogenase)                     | -             |
| <i>sspI</i>                      | BLi03018    | - - - + - - - + - - -   | Small acid-soluble spore protein SspI                                 | -             |
| <i>clpB</i>                      | GK0799      | 0 0 0 0 + + + 0 0 0 0   | Chaperone                                                             | -             |
| HSP16.4                          | BC2214      | 0 0 0 0 0 0 + 0 0 0 0   | Heat shock protein HSP.16.4                                           | -             |
| BC4452                           | BC4452      | 0 0 0 0 0 0 + 0 0 0 0   | Hypothetical protein                                                  | -             |
| <b>GlnR regulon</b>              | <b>glnR</b> | + + + + + + + 0 0 + + + | <b>Nitrogen excess response</b>                                       | -             |
| <i>glnRA</i>                     | BSU17450    | + + + + + + + 0 - + -   | Transcriptional regulator; glutamine synthetase                       | exp. 1346263  |
| <i>tnrA</i>                      | BSU13310    | + - + + + + 0 0 - - +   | Transcriptional regulator                                             | exp. 16547045 |
| <i>ureABC</i>                    | BSU36660    | + + 0 0 0 + 0 0 0 0 +   | Urease                                                                | exp. 9287005  |
| <i>nrgA</i>                      | BSU36510    | - - - - - + - - 0 -     | Ammonium transporter                                                  | -             |
| <i>alsT</i>                      | BC5051      | 0 0 0 0 0 0 + 0 0 0 0   | Sodium/proton-dependent alanine carrier protein                       | -             |
| <i>gltP</i>                      | BC1432      | 0 0 0 0 0 0 + 0 0 0 0   | Glutamate-aspartate carrier protein                                   | -             |
| <b>TnrA regulon</b>              | <b>tnrA</b> | + + + + + + 0 + + + +   | <b>Nitrogen assimilation</b>                                          | -             |
| <i>tnrA</i>                      | BSU13310    | + + + + + - 0 + + - +   | Transcriptional regulator                                             | exp. 16547045 |
| <i>glnRA</i>                     | BSU17450    | + + + + + - 0 + - + -   | Transcriptional regulator; glutamine synthetase                       | exp. 8799114  |
| <i>gabP</i>                      | BSU06310    | + + 0 - 0 0 - 0 0 0 0   | Gamma-aminobutyrate (GABA) permease                                   | exp. 8951816  |
| <i>oppABCDF</i>                  | BSU11430    | + + - + + + 0 + + 0 +   | Oligopeptide ABC transporter                                          | exp. 12823818 |
| <i>ywlFG</i>                     | BSU36920    | + + - - - - - - - -     | Ribose 5-phosphate isomerase B; hypothetical protein                  | exp. 12823818 |
| <i>pucABCDE</i>                  | BSU32510    | + - 0 0 0 - - - + 0 +   | Xanthine dehydrogenase                                                | -             |
| <i>pucJKLM</i>                   | BSU32430    | + 0 0 0 0 0 0 + - 0 +   | Xanthine permease; xanthine permease; uricase; urate oxidase stru     | exp. 12823818 |
| <i>pucH</i>                      | BSU32410    | + + 0 - 0 0 0 0 + 0 +   | Allantoinase                                                          | -             |

|                                            |          |   |   |   |   |   |   |   |   |   |   |                                                                   |                                                                             |               |
|--------------------------------------------|----------|---|---|---|---|---|---|---|---|---|---|-------------------------------------------------------------------|-----------------------------------------------------------------------------|---------------|
| <i>yurHG</i>                               | BSU32530 | - | - | + | 0 | 0 | 0 | - | - | 0 | + | Allantoinase; serine-pyruvate/alanine-glyoxylate aminotransferase | -                                                                           |               |
| <i>ABC3747-45</i>                          | ABC3747  | 0 | 0 | 0 | 0 | 0 | 0 | 0 | 0 | + | + | Hypothetical ABC transporter                                      | -                                                                           |               |
| <i>nasBC</i>                               | BSU03320 | + | + | - | + | 0 | + | - | + | + | 0 | +                                                                 | Assimilatory nitrate reductase                                              | exp. 7836289  |
| <i>nasDEF</i>                              | BSU03300 | + | + | 0 | + | 0 | + | - | + | + | 0 | +                                                                 | Nitrite reductase; uroporphyrin-III C-methyltransferase                     | exp. 7836289  |
| <i>nasA</i>                                | BSU03330 | + | + | 0 | 0 | 0 | 0 | 0 | 0 | + | 0 | 0                                                                 | Nitrate transporter                                                         | exp. 7836289  |
| <i>ykoLM</i>                               | BSU13330 | + | + | + | - | 0 | 0 | 0 | 0 | 0 | 0 | 0                                                                 | Hypothetical protein; transcriptional regulator                             | exp. 10671441 |
| <i>ykzB</i>                                | BSU13320 | + | + | 0 | 0 | + | + | 0 | 0 | 0 | 0 | 0                                                                 | Hypothetical protein                                                        | exp. 10671441 |
| <i>ycsFGI-kiplAR-lipC</i>                  | BSU04070 | + | + | + | + | 0 | - | - | - | - | - | -                                                                 | LamB/YcsF family protein; putative branched chain amino acids transporter   | exp. 9334321  |
| <i>nrgAB</i>                               | BSU36510 | + | + | + | + | + | + | 0 | + | + | 0 | +                                                                 | Ammonium transporter; nitrogen-regulated PII-like protein                   | exp. 8799114  |
| <i>pucR</i>                                | BSU32420 | + | + | + | + | 0 | 0 | 0 | + | - | 0 | +                                                                 | Transcriptional regulator of purine degradation operon                      | exp. 12823818 |
| <i>argCJBD-carAB-argF</i>                  | BSU11190 | + | + | + | + | - | - | - | - | - | - | -                                                                 | Arginine biosynthesis                                                       | -             |
| <i>glnA2</i>                               | GK1637   | 0 | 0 | 0 | 0 | + | + | 0 | + | + | 0 | 0                                                                 | Glutamine synthetase type I                                                 | -             |
| <i>ureABC</i>                              | BSU36660 | + | + | 0 | 0 | 0 | + | 0 | + | 0 | 0 | +                                                                 | Urease                                                                      | -             |
| <i>urtABCDE</i>                            | GK1937   | 0 | 0 | 0 | 0 | 0 | + | 0 | + | 0 | 0 | +                                                                 | Urea ABC transporter                                                        | -             |
| <i>pucl-ywoF</i>                           | BSU36470 | + | + | + | + | 0 | 0 | 0 | 0 | - | 0 | 0                                                                 | Allantoin permease; putative pectate lyase                                  | -             |
| <i>gltAB</i>                               | BSU18450 | + | + | + | + | - | - | 0 | - | - | - | -                                                                 | Glutamate synthase (large subunit); glutamate synthase (small subunit)      | exp. 11029411 |
| <i>gltC</i>                                | BSU18460 | + | + | + | + | - | - | 0 | 0 | 0 | 0 | 0                                                                 | Transcription activator                                                     | -             |
| <i>yoyD-yodF</i>                           | BSU19579 | + | + | + | + | 0 | 0 | 0 | 0 | 0 | 0 | 0                                                                 | Hypothetical protein; Na <sup>+</sup> /metabolite permease                  | exp. 12823818 |
| <i>yuiABC</i>                              | BSU32090 | + | + | + | + | - | - | - | + | - | - | -                                                                 | Hypothetical protein; hypothetical protein; cell wall-binding protein       | -             |
| <i>nagABRCP</i>                            | Bli04348 | - | + | - | + | 0 | - | - | + | - | + | -                                                                 | N-acetylglucosamine utilization                                             | -             |
| <i>ydaB</i>                                | BSU04170 | + | + | + | + | 0 | 0 | 0 | 0 | 0 | 0 | 0                                                                 | Long-chain-fatty-acid--CoA ligase                                           | -             |
| <i>ilvBHC-leuABCD</i>                      | BSU28310 | + | + | - | - | - | - | - | + | - | + | -                                                                 | Branched-chain amino acid biosynthesis                                      | exp. 15547269 |
| <i>alsT</i>                                | BSU18120 | + | + | 0 | + | 0 | 0 | 0 | + | - | 0 | 0                                                                 | Sodium:alanine symporter                                                    | exp. 12823818 |
| <i>thyA-dfrA</i>                           | BSU21820 | - | - | - | - | + | - | - | - | - | + | +                                                                 | Thymidylate synthase; dihydrofolate reductase                               | -             |
| <i>ilvD</i>                                | BSU21870 | - | - | + | + | + | + | - | - | - | 0 | -                                                                 | Dihydroxy-acid dehydratase                                                  | -             |
| <i>yumC</i>                                | BSU32110 | + | + | - | - | - | - | - | + | - | - | -                                                                 | Ferredoxin--NADP reductase 2                                                | -             |
| <i>pel</i>                                 | BSU07560 | + | + | 0 | + | 0 | 0 | 0 | 0 | 0 | 0 | 0                                                                 | Pectate lyase                                                               | exp. 12823818 |
| <i>arcD</i>                                | Bli03438 | 0 | 0 | 0 | + | 0 | 0 | 0 | + | + | 0 | 0                                                                 | Arginine/ornithine antiporter                                               | -             |
| <i>rapJ</i>                                | BSU02820 | + | + | + | + | 0 | 0 | 0 | 0 | 0 | 0 | 0                                                                 | Response regulator aspartate phosphatase                                    | -             |
| <i>gsiC-dppBCD-ABC0569-ABC0570-ABC0571</i> | ABC0565  | 0 | 0 | - | - | - | 0 | 0 | - | + | - | 0                                                                 | Oligopeptide transporter; hypothetical protein; acetylornithine deacetylase | -             |
| <i>braB</i>                                | BSU29600 | + | + | 0 | + | 0 | 0 | 0 | 0 | 0 | 0 | 0                                                                 | Branched chain amino acid-Na <sup>+</sup> symporter                         | -             |
| <i>yqzL-recO</i>                           | BSU25280 | + | + | + | + | - | + | - | + | - | - | -                                                                 | DNA recombination and repair protein                                        | -             |
| <i>gltT</i>                                | BH3820   | 0 | 0 | - | - | - | 0 | - | + | - | + | 0                                                                 | H <sup>+</sup> /sodium-glutamate symporter                                  | -             |
| <i>glnB-Bli01175</i>                       | Bli01176 | 0 | 0 | 0 | + | 0 | 0 | 0 | 0 | 0 | + | 0                                                                 | Nitrogen regulatory PII protein; ammonium transporter                       | -             |
| <i>ywdIJK</i>                              | BSU37930 | + | + | - | - | 0 | 0 | - | 0 | 0 | 0 | -                                                                 | Hypothetical protein; purine/ pyrimidine permease; hypothetical protein     | exp. 12823818 |
| <i>ysnE</i>                                | BSU28330 | + | + | + | 0 | 0 | 0 | 0 | + | 0 | 0 | 0                                                                 | Putative acetyltransferase                                                  | -             |
| <i>oppXYBZA</i>                            | OB2615   | 0 | 0 | 0 | 0 | 0 | 0 | 0 | + | + | + | 0                                                                 | Oligopeptide ABC transporter                                                | -             |
| <i>yclG</i>                                | BSU03680 | + | + | + | + | 0 | 0 | 0 | 0 | 0 | 0 | 0                                                                 | Pectate lyase family protein                                                | -             |

|                           |             |                       |                                                                      |               |
|---------------------------|-------------|-----------------------|----------------------------------------------------------------------|---------------|
| <i>yclF</i>               | BSU03670    | + + + - - 0 0 0 0 0 0 | Di-tripeptide-proton ABC symporter                                   |               |
| <i>ykgA</i>               | BSU13020    | - + + + 0 0 0 0 - - 0 | Arginine deiminase                                                   |               |
| <i>BLi02962</i>           | BLi02962    | 0 0 + + - - - 0 0 0 0 | Branched-chain amino acid aminotransferase                           |               |
| <i>pgsBCAE</i>            | BSU35900    | + - + - 0 0 0 0 0 0 0 | Polyglutamate synthesis                                              |               |
| <i>yrbD</i>               | BSU27810    | + 0 0 0 0 0 0 0 + 0 0 | Sodium/proton-alanine transporter                                    |               |
| <i>yvgT</i>               | BSU33460    | + + - - - - - - 0 -   | Membrane protein                                                     |               |
| <i>glnQHMP</i>            | BSU27430    | + - - 0 - - - 0 - 0 + | Glutamine ABC transporter                                            | exp. 12823818 |
| <i>yccC</i>               | BSU02690    | + - - 0 0 0 0 0 0 0 0 | L-asparaginase                                                       | exp. 11914346 |
| <i>yttA</i>               | BSU30360    | + + 0 0 0 0 0 0 0 0 0 | Hypothetical protein                                                 | exp. 12823818 |
| <i>ywrD</i>               | BSU36100    | + + 0 + 0 0 0 0 0 0 + | Gamma-glutamyltransferase                                            | exp. 12823818 |
| <i>yxkC</i>               | BSU38850    | + - 0 0 0 0 0 0 0 0 0 | Hypothetical protein                                                 | exp. 12823818 |
| <i>yycCBA</i>             | BSU40470    | + - - + 0 0 0 0 0 + 0 | Hypothetical protein; cyanate MFS transporter                        | exp. 12823818 |
| <i>degU</i>               | BSU35490    | + - + - - - 0 - - - - | Transcription regulator                                              | exp. 18502860 |
| <b>BglR regulon</b>       | <b>bglR</b> | + + + 0 0 0 0 0 0 0 0 | <b>Beta-glucoside catabolism</b>                                     |               |
| <i>bglR</i>               | BSU40130    | + + + 0 0 0 0 0 0 0 0 | Transcription regulator                                              |               |
| <i>bglA</i>               | BSU40110    | + + + 0 0 0 0 0 0 0 0 | Aryl-phospho-beta-glucosidase                                        |               |
| <b>RbsR regulon</b>       | <b>rbsR</b> | + + + + + + + + + + + | <b>Ribose utilization</b>                                            |               |
| <i>rbsRKDACB</i>          | BSU35910    | + + + + + + + + + + + | Ribose utilization                                                   |               |
| <b>ScrR regulon</b>       | <b>scrR</b> | 0 + 0 + 0 0 0 0 + 0 + | <b>Sucrose utilization</b>                                           |               |
| <i>scrR</i>               | RBAM_03184  | 0 + 0 + 0 0 0 0 - 0 + | Sucrose operon transcription regulator                               |               |
| <i>sacC</i>               | RBAM_03185  | 0 + 0 + - 0 0 0 + 0 + | Sucrose-6-phosphate hydrolase                                        |               |
| <i>ywbF</i>               | RBAM_03186  | 0 + 0 + 0 0 0 0 0 0 0 | Sucrose permease                                                     |               |
| <i>sacHGF</i>             | ABC3117     | 0 0 0 + 0 0 0 0 + 0 + | ABC sugar transporter                                                |               |
| <b>MsmR regulon</b>       | <b>msmR</b> | + + + + 0 0 0 + 0 0 0 | <b>Alpha-galactosides utilization</b>                                |               |
| <i>msmREFG-melA</i>       | BSU30260    | + + + + 0 0 0 + - 0 - | multiple sugar ABC transporter; alpha-galactosidase                  |               |
| <b>MdxR regulon</b>       | <b>mdxR</b> | + 0 0 + 0 0 0 0 0 0 0 | <b>Maltodextrin utilization</b>                                      |               |
| <i>mdxEFG-malAKL-pgcM</i> | BSU34610    | + 0 0 + 0 0 0 0 0 0 0 | Maltodextrin utilization                                             |               |
| <i>mdxD</i>               | BSU34610    | + 0 0 + - 0 - - - - 0 | Intracellular maltogenic amylase                                     |               |
| <b>NrdR regulon</b>       | <b>nrdR</b> | + + + + + + + + + + + | <b>Deoxyribonucleotide biosynthesis</b>                              |               |
| <i>nrdIEF-ymaB</i>        | BSU17370    | + + + + 0 0 + 0 + 0 + | Ribonucleotide reductase; ribonucleotide-diphosphate reductase;put   |               |
| <i>nrdJ</i>               | BH2810      | 0 0 0 0 0 + 0 + 0 0 + | Ribonucleoside-diphosphate reductase                                 |               |
| <i>nrdAB</i>              | BH0501      | 0 0 0 0 + + 0 + 0 + 0 | Ribonucleotide-diphosphate reductase                                 |               |
| <b>PurR regulon</b>       | <b>purR</b> | + + + + + + + + + + + | <b>Purine biosynthesis</b>                                           |               |
| <i>purA</i>               | BSU40420    | + + + + + + + + + + + | Adenylosuccinate synthase                                            | exp. 9393704  |
| <i>purR-yabJ</i>          | BSU00470    | + + + + - + + + + + + | Transcription regulator; endoribonuclease L-PSP                      | exp. 9393704  |
| <i>guaC</i>               | BSU32130    | + + 0 + 0 0 + 0 + + 0 | Guanosine 5'-monophosphate oxidoreductase                            | exp. 11591660 |
| <i>nusB-foID</i>          | BSU24320    | + + + + - + + + - - - | Transcription termination factor; 5,10-methylene-tetrahydrofolate de | exp. 11591660 |
| <i>glyA</i>               | BSU36900    | + + + + + + + + + - - | Serine hydroxymethyltransferase                                      | exp. 11591660 |



|                                            |             |   |   |   |   |   |   |   |   |   |   |   |                                                                        |               |
|--------------------------------------------|-------------|---|---|---|---|---|---|---|---|---|---|---|------------------------------------------------------------------------|---------------|
| <i>pbuO</i>                                | BSU29990    | + | + | + | + | 0 | 0 | 0 | 0 | 0 | 0 | 0 | Xanthine/uracil/thiamine/ascorbate permease                            | exp. 11591660 |
| <i>steT</i>                                | BSU12860    | + | + | + | + | - | 0 | - | 0 | 0 | 0 | 0 | Serine/threonine exchanger SteT                                        | -             |
| <i>purEKBCSQLFMNHD</i>                     | BSU06420    | + | + | + | + | + | + | + | + | + | + | - | IMP biosynthesis                                                       | exp. 9393704  |
| <i>pbuG</i>                                | BSU06370    | + | + | + | + | + | + | + | + | + | + | 0 | Hypoxanthine/guanine permease                                          | exp. 11591660 |
| <i>xpt-pbuX</i>                            | BSU22070    | + | + | + | + | 0 | 0 | + | + | + | - | - | Xanthine phosphoribosyltransferase; xanthine permease                  | exp. 11591660 |
| <i>gcvTBA</i>                              | BSU24570    | - | - | + | + | + | + | - | + | + | + | 0 | Glycine cleavage system protein T (aminomethyltransferase); Glycine    | -             |
| ABC2870-68                                 | ABC2870     | 0 | 0 | 0 | 0 | 0 | 0 | 0 | 0 | + | + | 0 | N-acetyl-L, L-diaminopimelate deacetylase; membrane protein; hypo      | -             |
| BH1470                                     | BH1470      | 0 | 0 | 0 | 0 | + | - | - | + | 0 | 0 | - | NAD(FAD)-utilizing dehydrogenase                                       | -             |
| OB2790                                     | OB2790      | 0 | 0 | 0 | 0 | 0 | 0 | 0 | 0 | 0 | + | 0 | Aminobenzoyl-glutamate transport protein pump; hypothetical protein    | -             |
| <b>MurR regulon</b>                        | <b>murR</b> | + | 0 | + | + | 0 | 0 | 0 | 0 | 0 | 0 | 0 | <b>Muropeptide rescue pathway</b>                                      | -             |
| <i>murQR-ybbF-amiE-nagZ-ybbC</i>           | BSU01700    | + | - | + | + | 0 | 0 | - | - | - | - | 0 | N-acetylmuramic acid-6-phosphate etherase; transcriptional regulato    | -             |
| <b>MhqR regulon</b>                        | <b>mhqR</b> | + | + | + | + | + | + | + | 0 | + | + | + | <b>2-Methylhydroquinone and catechol resistance (thiol stress)</b>     | -             |
| <i>mhqED</i>                               | BSU19570    | + | + | + | + | 0 | 0 | + | 0 | - | 0 | + | Glyoxalase/bleomycin resistance protein/dioxygenase; Carboxylester     | exp. 17725564 |
| <i>mhqNOP</i>                              | BSU05480    | + | + | + | + | 0 | 0 | + | 0 | + | + | - | Oxygen-insensitive NAD(P)H nitroreductase / Dihydropteridine reduc     | exp. 17725564 |
| <i>ywrF</i>                                | BSU36080    | - | - | - | + | 0 | 0 | + | - | - | - | + | Flavin reductase domain protein FMN-binding                            | -             |
| <i>ywrF</i>                                | ABC0534     | 0 | 0 | + | + | 0 | 0 | 0 | - | + | - | 0 | Putative multimeric flavodoxin                                         | -             |
| <i>mhqA</i>                                | BSU12870    | + | + | + | + | 0 | 0 | 0 | 0 | 0 | 0 | 0 | Lactoylglutathione lyase                                               | exp. 17725564 |
| <i>mhqR</i>                                | BSU13670    | - | - | - | + | + | - | + | 0 | + | - | + | MarR transcriptional regulator                                         | -             |
| <i>azoR2</i>                               | BSU33540    | + | + | + | - | 0 | - | + | - | 0 | 0 | 0 | FMN-dependent NADH-azoreductase                                        | exp. 17725564 |
| BC5037                                     | BC5037      | 0 | 0 | 0 | 0 | + | + | 0 | 0 | + | 0 | - | Pirin                                                                  | -             |
| <b>CymR</b>                                | <b>cymR</b> | + | + | + | + | + | + | + | + | + | + | + | <b>Cysteine metabolism</b>                                             | -             |
| <i>cysK</i>                                | BSU00730    | + | + | + | + | + | + | + | + | + | + | + | Cysteine synthase(O-acetyl-L-serine sulfhydrylase)                     | exp. 16513748 |
| <i>yrrT-mtn-mccA-yrhBC</i>                 | BSU27280    | + | + | + | + | + | + | + | - | - | - | + | Cysteine biosynthesis                                                  | exp. 16513748 |
| <i>cysJ-yvgQ</i>                           | BSU33440    | - | - | - | + | + | - | 0 | + | - | + | - | Sulfite reductase (NADPH)                                              | -             |
| <i>cysHP-sat-cysC-sumT-sirBC</i>           | BSU15570    | - | + | - | - | + | - | - | + | + | + | - | Siroheme biosynthesis                                                  | -             |
| <i>yhcL</i>                                | BSU09130    | + | - | 0 | + | 0 | 0 | + | 0 | + | + | + | Sodium-cystine symporter                                               | exp. 16513748 |
| <i>ytml-tcyJKLMN-ytmO-ytnIJ-rbfK-ytnLM</i> | BSU29390    | + | + | 0 | 0 | 0 | 0 | 0 | 0 | 0 | 0 | + | Putative N-acetyltransferase; sulfur-containing amino acid ABC trans   | exp. 16109943 |
| <i>yxeKLMNOPQ</i>                          | BSU39520    | + | + | + | 0 | 0 | 0 | 0 | 0 | 0 | 0 | 0 | Putative monooxygenase; putative acetyltransferase; amino acid AB      | exp. 16513748 |
| <i>ydbM</i>                                | BSU04520    | + | + | + | + | 0 | - | 0 | - | - | + | - | Putative acyl-CoA dehydrogenase                                        | exp. 16513748 |
| <i>ssuBACD</i>                             | BSU08830    | + | - | 0 | - | 0 | 0 | + | 0 | 0 | 0 | + | Aliphatic sulfonate ABC transporter (ATP-binding protein); aliphatic s | exp. 16513748 |
| <i>subI-cysTWA</i>                         | Pjdr2_4823  | 0 | 0 | 0 | 0 | 0 | 0 | + | + | - | 0 | + | Sulfate ABC transporter                                                | -             |
| <i>ytlI</i>                                | BSU29400    | + | + | 0 | 0 | 0 | 0 | 0 | 0 | 0 | 0 | 0 | Transcriptional regulator, LysR family                                 | exp. 16513748 |
| <i>cysL</i>                                | BSU37650    | - | - | - | + | + | - | - | 0 | 0 | - | 0 | Regulator of sulfur assimilation, activates cysJI expression           | -             |
| <b>NsrR regulon</b>                        | <b>nsrR</b> | + | + | + | + | 0 | + | 0 | + | + | + | 0 | <b>Nitrosative stress</b>                                              | -             |
| <i>hmp</i>                                 | BSU13040    | + | + | + | + | 0 | + | - | + | + | + | - | Flavoheмоprotein                                                       | exp. 16885456 |
| <i>nsrR</i>                                | BSU09380    | - | - | + | + | 0 | + | 0 | + | + | + | 0 | NO-dependent transcription regulator                                   | -             |
| <i>nasDEF</i>                              | BSU03300    | + | + | + | + | 0 | - | - | - | - | 0 | - | Nitrite reductase; uroporphyrin-III C-methyltransferase                | exp. 16885456 |
| <b>HisR regulon</b>                        | <b>hisR</b> | + | + | + | + | + | + | 0 | + | + | + | + | <b>Histidine metabolism</b>                                            | -             |

|                                 |             |                        |                                                                                                 |               |
|---------------------------------|-------------|------------------------|-------------------------------------------------------------------------------------------------|---------------|
| <i>yuiF</i>                     | BSU32040    | + + + + + 0 - + + + 0  | Histidine permease                                                                              | -             |
| <i>hisZGDBHAFI</i>              | BSU34930    | + + + + + + - + + + +  | Histidine biosynthesis                                                                          | -             |
| <b>Btr regulon</b>              | <b>btr</b>  | + + + + 0 0 0 0 + 0 0  | <b>Fe-bacillibactin uptake</b>                                                                  | -             |
| <i>feuABC</i>                   | BSU01630    | + + + + 0 - - - + - -  | Iron-uptake system                                                                              | exp. 17725565 |
| <i>ybbA</i>                     | BSU01600    | + + - - 0 0 0 0 0 - 0  | Putative ferri-bacillibactin esterase                                                           | exp. 17725565 |
| <i>yuil</i>                     | BSU32010    | - - 0 + 0 0 - 0 + - 0  | Putative ferri-bacillibactin esterase                                                           | -             |
| <b>ArsR regulon</b>             | <b>arsR</b> | + 0 0 0 0 0 + + + + 0  | <b>Arsenic resistance</b>                                                                       | -             |
| <i>arsR</i>                     | BSU25810    | + 0 0 0 0 0 + + + + 0  | Arsenical resistance operon repressor                                                           | exp. 9537360  |
| <i>yqcK</i>                     | BSU25800    | + - 0 0 0 0 + 0 + + 0  | Putative lactoylglutathione lyase                                                               | exp. 9537360  |
| <i>arsB</i>                     | BSU25790    | + 0 0 0 0 - + 0 0 0 0  | Arsenite efflux transporter                                                                     | exp. 9537360  |
| <i>aseRA</i>                    | BSU05330    | - - 0 - - - 0 - + - 0  | Arsenic resistance transcription regulator; arsenite efflux transporter                         | -             |
| <i>arsC</i>                     | BSU25780    | + 0 0 - 0 - 0 - + - 0  | Arsenate reductase                                                                              | exp. 9537360  |
| <i>BH2995</i>                   | BH2995      | 0 0 0 0 0 0 0 + 0 0 0  | FAD dependent oxidoreductase                                                                    | -             |
| <b>AseR regulon</b>             | <b>aseR</b> | + + 0 + + + 0 + + + 0  | <b>Arsenic resistance</b>                                                                       | -             |
| <i>aseRA</i>                    | BSU05330    | + + 0 + + + 0 + + + 0  | Arsenic resistance transcription regulator; arsenite efflux transporter                         | exp. 15948947 |
| <i>arsC</i>                     | BSU25780    | - 0 0 + 0 + 0 + + + 0  | Arsenate reductase                                                                              | -             |
| <i>arsB</i>                     | BSU25790    | - 0 0 0 0 + - 0 - - 0  | Arsenite efflux transporter                                                                     | -             |
| <b>CzrA regulon</b>             | <b>czrA</b> | + + + + + + + 0 + + +  | <b>Zn(II), Cd(II), Cu(II), Co(II) and Ni(II) resistance</b>                                     | -             |
| <i>czcDO</i>                    | BSU26650    | + + 0 + 0 + + - + + +  | Cation diffusion facilitator family transporter; CzcD accessory protein                         | exp. 15948947 |
| <i>cadA</i>                     | BSU33490    | + + + + + 0 - - 0 0 +  | P-type ATPase Cd(II) transporter                                                                | exp. 15948947 |
| <i>czrA</i>                     | BSU19120    | - - - - + + - - + + -  | Multiple metal-sensing transcriptional repressor                                                | -             |
| <b>SdpR regulon</b>             | <b>sdpR</b> | + 0 + + + + + 0 + + +  | <b>SdpC antitoxin system involved in sporulation</b>                                            | -             |
| <i>sdpRI</i>                    | BSU33790    | + 0 + + + + + 0 + + +  | Transcriptional regulator of SdpC resistance operon; integral membrane protein                  | exp. 16469701 |
| <b>YwrC regulon</b>             | <b>ywrC</b> | + + + + 0 0 0 0 0 0 +  | <b>Metal efflux transporter</b>                                                                 | -             |
| <i>ywrCBA</i>                   | BSU36110    | + + + + 0 - 0 - - - +  | Transcription regulator; transporter from the chromate efflux transporter                       | -             |
| <b>GlcR regulon</b>             | <b>glcR</b> | + + 0 + 0 0 0 + 0 + +  |                                                                                                 | -             |
| <i>glcR-ywpJ</i>                | BSU36300    | + + 0 + 0 0 0 + 0 + -  | Transcription regulator; hydrolase                                                              | -             |
| <b>LevR regulon</b>             | <b>levR</b> | + 0 0 + 0 0 0 0 0 0 0  | <b>Levan utilization</b>                                                                        | -             |
| <i>levDEFG-sacC</i>             | BSU27070    | + 0 0 + 0 0 0 0 0 0 0  | Phosphotransferase system; levanase                                                             | exp. 8057358  |
| <b>RocR regulon</b>             | <b>rocR</b> | + + + + 0 + + + + 0 0  | <b>Arginine and ornithine utilization</b>                                                       | -             |
| <i>rocR</i>                     | BSU40350    | + + + + 0 + + + + 0 0  | Transcriptional activator of arginine utilization operon                                        | exp. 7540694  |
| <i>rocABC</i>                   | BSU37780    | + + + - - + - + - - 0  | Arginine utilization                                                                            | exp. 12634342 |
| <i>rocDEF</i>                   | BSU40340    | + + + + - + - + + - -  | Arginine utilization                                                                            | exp. 7540694  |
| <i>rocG</i>                     | BSU37790    | +* - - - - + - + - - - | NAD-specific glutamate dehydrogenase                                                            | exp. 12634342 |
| <b>AcoR regulon</b>             | <b>acoR</b> | + + + + 0 0 + + 0 0 0  | <b>Acetoin dehydrogenase</b>                                                                    | -             |
| <i>acoABCL</i>                  | BSU08060    | + + + + 0 0 + + - 0 0  | Acetoin dehydrogenase complex                                                                   | exp. 11274109 |
| <b>BkdR regulon</b>             | <b>bkdR</b> | + + + + + + + + + 0    | <b>Isoleucine and valine utilization</b>                                                        | -             |
| <i>ptb-bcd-buk-lpdV-bkdAABB</i> | BSU24090    | + + + + + + + + + -    | Phosphate butyryltransferase; leucine dehydrogenase; branched-chain amino acid aminotransferase | exp. 10094682 |

|                                             |                   |                       |                                                                                 |               |
|---------------------------------------------|-------------------|-----------------------|---------------------------------------------------------------------------------|---------------|
| <i>bkdR</i>                                 | BSU24100          | + + + + + + + - - + 0 | Sigma-L-dependent transcriptional regulator                                     | -             |
| <b>GmuR</b>                                 | <b>gmuR</b>       | + + + + 0 + 0 + 0 0 0 | <b>Glucmannan utilization</b>                                                   | -             |
| <i>gmuBACDREFG</i>                          | BSU05810          | + + + + 0 + 0 + - - 0 | PTS system, cellobiose-specific enzyme II, B component; PTS system              | exp. 18177310 |
| <b>CcpN regulon</b>                         | <b>ccpN</b>       | + + + + + + + + + + 0 | <b>Gluconeogenesis</b>                                                          | -             |
| <i>gapB</i>                                 | BSU29020          | + + + + + + + + + + 0 | Glyceraldehyde-3-phosphate dehydrogenase                                        | exp. 17011578 |
| <i>pckA</i>                                 | BSU30560          | + + + + + + + + + + 0 | Phosphoenolpyruvate carboxykinase (ATP)                                         | exp. 17011578 |
| <b>CcpB regulon</b>                         | <b>ccpB</b>       | + + 0 0 0 0 0 0 0 0 0 | <b>Catabolite repression</b>                                                    | -             |
| <i>gntRKPZ</i>                              | BSU40050          | + 0 0 - 0 0 0 0 0 - 0 | Gluconate utilization                                                           | exp. 9457849  |
| <i>xylAB</i>                                | BSU17600          | + + - - - - - - - -   | Xylose utilization                                                              | exp. 9457849  |
| <b>BglZ regulon</b>                         | <b>bglZ</b>       | + + + + 0 0 + 0 0 0 0 | <b>Beta-glucoside catabolism</b>                                                | -             |
| <i>bglC</i>                                 | BSU03410          | + + + + 0 - 0 0 0 0 0 | Aryl-phospho-beta-D-glucosidase                                                 | -             |
| <i>bglZ (ykvZ)</i>                          | BSU13870          | + + + - 0 0 + 0 0 0 0 | Transcriptional regulator, LacI family                                          | -             |
| BC2618                                      | BC2618            | 0 0 0 0 0 0 + 0 0 0 0 | Hydrolase (HAD superfamily)                                                     | -             |
| <b>CitR regulon</b>                         | <b>citR</b>       | + + 0 + 0 0 0 0 + 0 0 | <b>Citrate synthase</b>                                                         | -             |
| <i>citA</i>                                 | BSU09940          | + + 0 + 0 0 0 0 + 0 0 | Citrate synthase I                                                              | exp. 8045899  |
| <i>citR</i>                                 | BSU09930          | + + 0 + 0 0 0 0 + 0 0 | Transcriptional regulator                                                       | -             |
| <b>GltR regulon</b>                         | <b>gltR</b>       | + 0 0 0 0 0 0 0 0 0 + |                                                                                 | -             |
| <i>gltR</i>                                 | BSU26670          | + 0 0 0 0 0 0 0 0 0 + | Transcription regulator                                                         | exp. 9023181  |
| <i>Pjdr2_3124</i>                           | <i>Pjdr2_3124</i> | 0 0 0 0 0 0 0 0 0 0 + | Major facilitator (MFS) superfamily protein                                     | -             |
| <i>yrpB</i>                                 | BSU26800          | + - - - 0 0 - - 0 - + | 2-nitropropane dioxygenase                                                      | -             |
| <b>YtlI regulon</b>                         | <b>ytlI</b>       | + + 0 0 0 0 0 0 0 0 0 | <b>L-cystine transporter</b>                                                    | -             |
| <i>ytml-tcyJKLMN-ytmO-ytnI-J-rbfK-ytnLM</i> | BSU29390          | + + 0 0 0 0 0 0 0 0 - | Putative N-acetyltransferase; L-cystine ABC transporter; putative monooxygenase | exp. 16109943 |
| <i>ytlI</i>                                 | BSU29400          | + + 0 0 0 0 0 0 0 0 0 | Transcriptional regulator, LysR family                                          | exp. 16109943 |
| <b>CysL regulon</b>                         | <b>cysL</b>       | + + + + + 0 0 0 + 0   | <b>Sulfate, sulfite, or thiosulfate</b>                                         | -             |
| <i>cysL</i>                                 | BSU37650          | + + + + + 0 0 0 + 0   | Transcriptional regulator                                                       | exp. 12169591 |
| <i>cysJI</i>                                | BSU33440          | + + + + + 0 - - + -   | Sulfite reductase                                                               | exp. 12169591 |
| <b>YetL regulon</b>                         | <b>yetL</b>       | + + 0 0 0 0 0 0 0 0 0 | <b>Flavonoids response</b>                                                      | -             |
| <i>yetL</i>                                 | BSU07220          | + + 0 0 0 0 0 0 0 0 0 | Transcriptional regulator                                                       | exp. 19329649 |
| <i>yetM</i>                                 | BSU07230          | + + 0 0 0 0 0 0 0 0 0 | Putative FAD-dependent monooxygenase                                            | exp. 19329649 |
| <b>OhrR regulon</b>                         | <b>ohrR</b>       | + + + + 0 + + 0 0 + + | <b>Organic hydroperoxide resistance</b>                                         | -             |
| <i>ohrR</i>                                 | BSU13150          | - - - - 0 - + 0 0 + - | Transcriptional regulator, MarR family                                          | -             |
| <i>ohrA</i>                                 | BSU13140          | + + + + 0 + + 0 0 + + | Organic hydroperoxide resistance protein                                        | exp. 11418552 |
| <i>tpx-trxB</i>                             | BSU29490          | - - - - - - - - - +   | Thioredoxin reductase; thiol peroxidase                                         | -             |
| <b>CitT regulon</b>                         | <b>citT</b>       | + + + + 0 0 + + + + 0 | <b>Citrate transport</b>                                                        | -             |
| <i>citM</i>                                 | BSU07610          | + + + + 0 0 0 + + + 0 | Citrate/Mg2+ transporter                                                        | exp. 10972810 |
| <i>tctCBA</i>                               | OB3249            | 0 0 0 0 0 0 0 0 0 + 0 | Tricarboxylate transporter                                                      | -             |
| <i>citH</i>                                 | BC0562            | 0 0 0 0 0 0 + 0 0 0 0 | Ca2+/citrate complex secondary transporter                                      | -             |
| <b>DctR regulon</b>                         | <b>dctR</b>       | + + + 0 0 + 0 0 0 0 0 | <b>C4-dicarboxylate transport</b>                                               | -             |

|                            |                  |                       |                                                                                                       |               |
|----------------------------|------------------|-----------------------|-------------------------------------------------------------------------------------------------------|---------------|
| <i>dctA</i>                | BSU04470         | + + + 0 0 + 0 0 0 0 0 | C4-dicarboxylate transporter for succinate, fumarate, malate and oxaloacetate                         | exp. 10708364 |
| <b>DeoR regulon</b>        | <b>deoR</b>      | + + + + 0 0 + 0 0 0 0 | <b>Deoxynucleoside utilization</b>                                                                    | -             |
| <i>dra-nupC-pdp</i>        | BSU39420         | + + + + 0 0 + 0 0 0 0 | Deoxyribose-phosphate aldolase; pyrimidine-nucleoside Na <sup>+</sup> (H <sup>+</sup> ) cotransporter | exp. 10714997 |
| <b>FadR regulon</b>        | <b>fadR</b>      | + + + + + + + + + + 0 | <b>Fatty acid degradation</b>                                                                         | -             |
| <i>lcfB</i>                | BSU10270         | + + + + + 0 0 0 0 0 0 | Long-chain fatty-acid-CoA ligase                                                                      | exp. 17189250 |
| <i>fadHG</i>               | BSU14060         | + + + + + + - + - 0 0 | Probable 2,4-dienoyl-CoA reductase                                                                    | exp. 17189250 |
| <i>fadNAE</i>              | BSU32840         | + + + + - + + + + + - | Fatty acid degradation                                                                                | exp. 17189250 |
| <i>fadF-accA-rpoE</i>      | BSU37180         | + + + + + + + + + + - | Fatty acid degradation                                                                                | exp. 17189250 |
| <i>mmgABC</i>              | BSU24170         | - - + + + + + + - -   | Fatty acid degradation                                                                                | -             |
| <i>fadRB-etfBA</i>         | BSU28550         | + + + + + + + + + + - | Transcriptional regulator of fatty acids degradation (TetR/AcrR family)                               | exp. 17189250 |
| <i>Aflv_1606</i>           | <i>Aflv_1606</i> | 0 0 0 0 + + 0 0 + + 0 | Zn-dependent hydrolase                                                                                | -             |
| <b>LmrA regulon</b>        | <b>lmrA</b>      | + + 0 0 0 0 0 0 0 0   | <b>Multidrug resistance</b>                                                                           | -             |
| <i>lmrAB</i>               | BSU02680         | + + - - 0 0 0 0 0 0   | Transcriptional repressor of multidrug resistance regulon; lincomycin resistance protein              | exp. 17483215 |
| <i>qdoR</i>                | BSU39990         | + - - - 0 0 0 0 0 0   | Transcriptional regulator of multidrug resistance regulon                                             | exp. 17483215 |
| <i>qodI-yxaH</i>           | BSU39980         | + 0 - 0 0 0 0 - 0 0   | Quercetin 2,3-dioxygenase; putative transporter                                                       | exp. 17483215 |
| <b>QdoR regulon</b>        | <b>yxaF</b>      | + + + + 0 0 0 0 0 0   | <b>Multidrug resistance</b>                                                                           | -             |
| <i>lmrAB</i>               | BSU02680         | + + - + 0 0 0 0 0 0   | Transcriptional repressor of multidrug resistance regulon; lincomycin resistance protein              | exp. 17483215 |
| <i>qdoR</i>                | BSU39990         | + - - + 0 0 0 0 0 0   | Transcriptional regulator of multidrug resistance regulon                                             | exp. 17483215 |
| <i>qodI-yxaH</i>           | BSU39980         | + 0 + 0 0 0 0 - 0 0   | Quercetin 2,3-dioxygenase; putative transporter                                                       | exp. 17483215 |
| <b>FatR regulon</b>        | <b>fatR</b>      | + + + + 0 0 0 0 0 0   | <b>Toxic fatty acid stress response</b>                                                               | -             |
| <i>fatR-cypB</i>           | BSU27170         | + + + + 0 0 0 0 0 0   | Transcriptional regulator for cytochrome P450 102A3, TetR family; CYP2B10                             | exp. 11734890 |
| <b>AnsR regulon</b>        | <b>ansR</b>      | + + + + 0 0 + 0 0 0 0 | <b>Asparagine degradation</b>                                                                         | -             |
| <i>ansR</i>                | BSU23580         | + + + + 0 0 + 0 0 0 0 | Transcriptional regulator                                                                             | exp. 11914346 |
| <i>ansAB</i>               | BSU23590         | + + + + - 0 + 0 0 0 0 | Asparagine degradation                                                                                | exp. 11914346 |
| <b>BltR regulon</b>        | <b>bltR</b>      | + + + 0 0 0 0 + 0 0 0 | <b>Multidrug transporter</b>                                                                          | -             |
| <i>bltD</i>                | BSU26600         | + + 0 0 0 0 0 0 - 0   | Spermine/spermidine acetyltransferase                                                                 | exp. 7608059  |
| <i>blt</i>                 | BSU26590         | + - - 0 0 0 - 0 - 0 - | Multidrug resistance protein, major facilitator (MFS) superfamily                                     | exp. 7608059  |
| <i>ydhB</i>                | BSU05690         | - + - 0 0 0 - 0 0 -   | Hypothetical secreted protein                                                                         | -             |
| <i>yrkN</i>                | BPUM_1819        | - - + 0 0 0 0 0 0 0   | Possible acetyltransferase                                                                            | -             |
| <i>BH4045</i>              | <i>BH4045</i>    | 0 0 0 0 0 0 0 + 0 0   | MATE family multidrug export protein                                                                  | -             |
| <b>NagR regulon</b>        | <b>nagR</b>      | + + + + 0 + + + + + 0 | <b>N-acetylglucosamine utilization</b>                                                                | -             |
| <i>nagABR</i>              | BSU35010         | + + + + 0 + + + + + 0 | N-acetylglucosamine utilization                                                                       | exp. 21602348 |
| <i>nagP</i>                | BSU07700         | + + + + 0 0 - + 0 0 - | PTS system, N-acetylglucosamine-specific IIBC component                                               | exp. 21602348 |
| <i>murQ2</i>               | BLi04351         | 0 0 0 + 0 0 0 0 0 0   | N-acetylmuramic acid-6-phosphate etherase                                                             | -             |
| <b>LutR (LidR) regulon</b> | <b>lldR</b>      | + + + + + + + + + 0   | <b>L-lactate utilization</b>                                                                          | -             |
| <i>lutABC</i>              | BSU34050         | + + + + + + + + + 0   | L-lactate dehydrogenase                                                                               | exp. 19201793 |
| <i>lutR</i>                | BSU34180         | + + - + - - - - + 0   | Transcriptional regulator                                                                             | -             |
| <i>lutP</i>                | BSU34190         | + + 0 + + + 0 + + + 0 | L-lactate permease                                                                                    | -             |

|                            |                    |   |   |   |   |   |   |   |   |   |   |   |                                                                       |               |
|----------------------------|--------------------|---|---|---|---|---|---|---|---|---|---|---|-----------------------------------------------------------------------|---------------|
| <b>FrIR regulon</b>        | <b>frIR</b>        | + | + | 0 | 0 | 0 | 0 | 0 | 0 | 0 | 0 | 0 | <b>Fructoselysine utilization</b>                                     |               |
| <i>frIR</i>                | <i>BSU32560</i>    | + | + | 0 | 0 | 0 | 0 | 0 | 0 | 0 | 0 | 0 | Transcription regulator                                               | exp. 21398478 |
| <i>frIB</i>                | <i>BSU32610</i>    | + | + | 0 | 0 | 0 | 0 | 0 | 0 | 0 | 0 | 0 | Fructoselysine-6-P-deglycase                                          | exp. 21398478 |
| <i>yurJ</i>                | <i>BSU32550</i>    | + | + | 0 | 0 | 0 | 0 | 0 | 0 | 0 | 0 | 0 | Putative fructoselysine ABC transporter (ATP-binding protein)         |               |
| <i>frIONMD</i>             | <i>BSU32600</i>    | + | + | 0 | 0 | 0 | 0 | 0 | 0 | 0 | 0 | 0 | Putative fructoselysine ABC transporter; fructoselysine kinase        | exp. 21398478 |
| <b>YhcF regulon</b>        | <b>yhcF</b>        | + | + | 0 | 0 | 0 | 0 | + | + | + | 0 | + | <b>Antibiotics resistance</b>                                         |               |
| <i>yhcEFGHI</i>            | <i>BSU09080</i>    | + | + | 0 | - | 0 | 0 | + | + | 0 | 0 | + | Putative integral inner membrane; transcriptional regulator (GntR fam |               |
| <i>bcrAB</i>               | <i>ABC1458</i>     | 0 | 0 | - | - | 0 | 0 | + | 0 | + | - | - | Bacitracin transport                                                  |               |
| <b>GabR regulon</b>        | <b>gabR</b>        | + | + | + | + | 0 | 0 | 0 | 0 | 0 | 0 | 0 | <b>Gamma-aminobutyrate utilization</b>                                |               |
| <i>gabTD</i>               | <i>BSU03900</i>    | + | + | + | + | - | 0 | - | - | 0 | 0 | 0 | 4-aminobutyrate aminotransferase; succinate-semialdehyde dehydro      | exp. 15223311 |
| <i>BH0994</i>              | <i>BH0994</i>      | 0 | 0 | + | + | - | 0 | 0 | - | 0 | - | 0 | Amino acid transporter                                                |               |
| <i>gabR</i>                | <i>BSU03890</i>    | + | + | + | + | 0 | 0 | 0 | 0 | 0 | 0 | 0 | Transcriptional regulator of gamma-aminobutyrate utilization          | exp. 15223311 |
| <b>YcxD regulon</b>        | <b>ycxD</b>        | + | + | + | + | 0 | 0 | 0 | 0 | 0 | 0 | + | <b>Hypothetical drug/metabolite efflux transporter</b>                |               |
| <i>ycxD</i>                | <i>BSU03560</i>    | + | + | + | + | 0 | 0 | 0 | 0 | 0 | 0 | + | Transcriptional regulator, GntR (MocR/GabR) family                    |               |
| <i>ycxC</i>                | <i>BSU03550</i>    | + | + | + | + | 0 | 0 | 0 | 0 | 0 | 0 | + | DMT superfamily drug/metabolite transporter                           |               |
| <b>Yhdl / YdeL regulon</b> | <b>yhdl</b>        | + | + | 0 | + | 0 | 0 | + | 0 | 0 | 0 | 0 |                                                                       |               |
| <i>yhdl</i>                | <i>BSU09480</i>    | + | 0 | 0 | + | 0 | 0 | + | 0 | 0 | 0 | 0 | Transcription regulator                                               |               |
| <i>ydhJ</i>                | <i>BSU09490</i>    | + | 0 | 0 | + | 0 | - | + | - | - | - | 0 | Acetyltransferase                                                     |               |
| <i>ydeL</i>                | <i>BSU05240</i>    | + | + | 0 | 0 | 0 | 0 | + | 0 | 0 | 0 | 0 | Transcription regulator                                               |               |
| <i>ydeK</i>                | <i>BSU05230</i>    | + | + | 0 | 0 | 0 | 0 | + | 0 | 0 | 0 | 0 | Hypothetical efflux transporter, DMT family                           |               |
| <b>YdfD / YisV regulon</b> | <b>ydfD / yisV</b> | + | 0 | 0 | 0 | 0 | 0 | + | + | + | 0 | + | <b>Hypothetical efflux transporter</b>                                |               |
| <i>ydfD</i>                | <i>BSU05370</i>    | + | 0 | 0 | 0 | 0 | 0 | + | 0 | 0 | 0 | 0 | Transcription regulator                                               |               |
| <i>ydfC</i>                | <i>BSU05360</i>    | + | 0 | 0 | 0 | 0 | 0 | + | 0 | - | 0 | 0 | Drug/metabolite transporter, DMT superfamily                          |               |
| <i>yisV</i>                | <i>BSU10880</i>    | + | 0 | 0 | 0 | 0 | 0 | + | + | + | 0 | + | Transcription regulator                                               |               |
| <i>yisU</i>                | <i>BSU10870</i>    | + | 0 | - | 0 | 0 | 0 | + | + | + | 0 | + | Hypothetical efflux transporter, LysE family                          |               |
| <b>BmrR regulon</b>        | <b>bmrR</b>        | + | 0 | 0 | + | 0 | 0 | 0 | 0 | 0 | 0 | 0 | <b>Multidrug transporter</b>                                          |               |
| <i>bmr-bmrR</i>            | <i>BSU24010</i>    | + | 0 | 0 | - | 0 | 0 | 0 | 0 | 0 | 0 | 0 | Multidrug transporter (MFS family); transcriptional regulator         | exp. 7961792  |
| <i>BLi02783</i>            | <i>BLi02783</i>    | 0 | 0 | 0 | + | 0 | 0 | 0 | 0 | 0 | 0 | 0 | Flavoredoxin                                                          |               |
| <b>YdfL regulon</b>        | <b>ydfL</b>        | + | 0 | 0 | + | 0 | 0 | + | + | 0 | 0 | 0 | <b>Multidrug transporter</b>                                          |               |
| <i>BC1615</i>              | <i>BC1615</i>      | 0 | 0 | 0 | + | 0 | 0 | + | 0 | - | 0 | 0 | Na+ driven multidrug efflux pump                                      |               |
| <i>ydfK</i>                | <i>BSU05450</i>    | + | 0 | 0 | 0 | 0 | 0 | 0 | 0 | 0 | 0 | 0 | Putative integral inner membrane protein                              |               |
| <i>BH0429</i>              | <i>BH0429</i>      | 0 | 0 | 0 | - | 0 | - | 0 | + | 0 | 0 | 0 | Putative transporter                                                  |               |
| <b>RmgR regulon</b>        | <b>rmgR</b>        | + | 0 | + | + | 0 | 0 | 0 | + | + | + | + | <b>Rhamnogalacturonan utilization</b>                                 |               |
| <i>yteP-urhG2-yteSTU</i>   | <i>BSU30135</i>    | + | 0 | + | + | 0 | 0 | 0 | + | + | + | + | Rhamnogalaturonan utilization                                         |               |
| <i>uxaAB</i>               | <i>ABC1153</i>     | 0 | 0 | 0 | 0 | 0 | 0 | 0 | + | + | 0 | 0 | Altronate hydrolase; altronate oxidoreductase                         |               |
| <i>BH0493-peIX</i>         | <i>BH0493</i>      | 0 | 0 | 0 | 0 | 0 | 0 | 0 | + | 0 | 0 | 0 | Putative uronate isomerase; exopolysaccharuronate lyase               |               |
| <i>pgIR</i>                | <i>OB2088</i>      | 0 | 0 | 0 | 0 | 0 | 0 | 0 | 0 | 0 | + | 0 | Polygalacturonase                                                     |               |
| <i>xyIB</i>                | <i>OB2087</i>      | 0 | 0 | 0 | 0 | 0 | 0 | 0 | + | + | 0 | 0 | Xylosidase/arabinosidase                                              |               |

|                           |                   |   |   |   |   |   |   |   |   |   |   |   |   |                                                                              |               |
|---------------------------|-------------------|---|---|---|---|---|---|---|---|---|---|---|---|------------------------------------------------------------------------------|---------------|
| <i>rhgT</i>               | OB2084            | 0 | 0 | 0 | 0 | 0 | 0 | 0 | 0 | 0 | 0 | + | 0 | Rhamnogalacturonan acetyltransferase                                         | -             |
| <b>RhgR regulon</b>       | <b>rhgR</b>       | + | 0 | 0 | + | 0 | 0 | 0 | 0 | 0 | 0 | + | + | <b>Rhamnogalacturonan utilization</b>                                        | -             |
| <i>yesOPQ</i>             | BSU06970          | + | 0 | 0 | + | 0 | 0 | 0 | - | - | 0 | + | + | Rhamnose oligosaccharide ABC transporter                                     | -             |
| <i>urhG1-yesSTUVWXYZ</i>  | BSU07000          | + | 0 | 0 | + | 0 | 0 | 0 | 0 | 0 | 0 | 0 | 0 | Rhamnogalacturonan utilization                                               | -             |
| <b>KipR regulon</b>       | <b>kipR</b>       | + | + | + | + | 0 | + | + | + | 0 | 0 | 0 | 0 | <b>Initiation of developmental transcription at the onset of sporulation</b> | -             |
| <i>ycsFGI-kiplAR-lipC</i> | BSU04050          | + | + | + | + | 0 | + | + | + | - | - | - | - | LamB/YcsF family protein; putative branched chain amino acids transp         | exp. 9334321  |
| <b>AdaA regulon</b>       | <b>adaA</b>       | + | + | 0 | + | 0 | 0 | + | 0 | + | 0 | + | + | <b>Adaptative response to DNA alkylation</b>                                 | -             |
| <i>adaAB</i>              | BSU01810          | + | + | 0 | + | 0 | - | + | 0 | + | - | + | + | Methylphosphotriester-DNA alkyltransferase and transcriptional regul         | exp. 8376346  |
| <i>alkA</i>               | BSU01800          | + | 0 | 0 | 0 | 0 | 0 | + | 0 | + | 0 | + | + | DNA-3-methyladenine glycosylase II                                           | exp. 8376346  |
| <i>exoA</i>               | BSU40880          | - | + | 0 | 0 | 0 | - | - | 0 | - | - | - | - | Exodeoxyribonuclease III                                                     | -             |
| <i>Pjdr2_5361</i>         | <i>Pjdr2_5361</i> | 0 | 0 | 0 | 0 | 0 | 0 | 0 | 0 | 0 | 0 | 0 | + | Short-chain dehydrogenase/reductase                                          | -             |
| <b>CcpC regulon</b>       | <b>ccpC</b>       | + | + | + | + | 0 | 0 | + | 0 | 0 | + | 0 | 0 | <b>TCA cycle</b>                                                             | -             |
| <i>ccpC</i>               | BSU14140          | + | - | + | + | 0 | 0 | - | 0 | 0 | + | 0 | 0 | Transcriptional repressor of citB and citZ                                   | exp. 11985717 |
| <i>citB</i>               | BSU18000          | + | + | + | + | - | - | + | - | - | + | - | - | Aconitase A                                                                  | exp. 10656796 |
| <i>citZ-icd-mdh</i>       | BSU29140          | + | + | - | - | - | - | - | - | - | - | - | - | Citrate cycle                                                                | exp. 10656796 |
| <b>YdfI regulon</b>       | <b>ydfI</b>       | + | + | 0 | + | 0 | 0 | 0 | 0 | 0 | 0 | 0 | 0 | <b>Metabolite transport</b>                                                  | -             |
| <i>ydfJ</i>               | BSU05430          | + | + | 0 | + | 0 | 0 | 0 | 0 | 0 | 0 | 0 | 0 | RND superfamily transporter                                                  | exp. 15941986 |
| <b>BceR regulon</b>       | <b>bceR</b>       | + | + | + | + | 0 | + | 0 | + | + | + | 0 | 0 | <b>Bacitracin resistance</b>                                                 | -             |
| <i>bceAB</i>              | BSU30380          | + | + | + | + | 0 | + | - | + | + | + | 0 | 0 | ABC transporter involved in bacitracin resistance                            | exp. 12890034 |
| <b>AlsR regulon</b>       | <b>alsR</b>       | + | + | + | + | 0 | 0 | + | 0 | 0 | 0 | 0 | 0 | <b>Alpha-acetolactate biosynthesis</b>                                       | -             |
| <i>alsR</i>               | BSU36020          | + | + | + | + | 0 | 0 | - | 0 | 0 | 0 | 0 | 0 | Transcription regulator                                                      | exp. 22178965 |
| <i>alsSD</i>              | BSU36010          | + | + | + | + | 0 | 0 | - | 0 | 0 | 0 | 0 | 0 | Acetolactate synthase ;alpha-acetolactate decarboxylase                      | exp. 22178965 |
| <b>GudR regulon</b>       | <b>gudR</b>       | + | 0 | 0 | + | 0 | 0 | 0 | 0 | + | + | 0 | 0 | <b>D-glucarate/galactarate utilization</b>                                   | -             |
| <i>gudR</i>               | BSU02500          | + | 0 | 0 | + | 0 | 0 | 0 | 0 | + | + | 0 | 0 | Transcription regulator                                                      | exp. 12044674 |
| <i>garD</i>               | BSU02510          | + | 0 | 0 | + | 0 | 0 | 0 | 0 | 0 | 0 | 0 | 0 | D-galactarate dehydratase                                                    | exp. 12044674 |
| <i>ycbCD-gudD</i>         | BSU02460          | + | 0 | 0 | + | 0 | 0 | 0 | 0 | + | + | 0 | 0 | Glucarate utilization                                                        | exp. 12044674 |
| <i>gudP</i>               | BSU02480          | + | 0 | 0 | + | 0 | 0 | 0 | 0 | 0 | 0 | 0 | 0 | Glucarate transporter                                                        | exp. 12044674 |
| <i>ABC0466</i>            | ABC0466           | 0 | 0 | 0 | 0 | 0 | 0 | 0 | 0 | + | 0 | 0 | 0 | Putative glucarate dehydratase                                               | -             |
| <i>ABC0469-67</i>         | ABC0469-67        | 0 | 0 | 0 | 0 | 0 | 0 | 0 | 0 | + | + | 0 | 0 | Predictic D-glucarateTTT family transporter                                  | -             |
| <b>DesR regulon</b>       | <b>desR</b>       | + | + | + | + | 0 | 0 | 0 | 0 | + | + | 0 | 0 | <b>Cold shock</b>                                                            | -             |
| <i>des-desKR</i>          | BSU036870         | + | + | + | + | 0 | 0 | 0 | 0 | + | + | 0 | 0 | Delta 5 - fatty acid desaturase; two-component system                        | exp. 11285232 |
| <b>YvfU regulon</b>       | <b>yvfU</b>       | + | 0 | 0 | + | 0 | 0 | 0 | 0 | + | 0 | + | + |                                                                              | -             |
| <i>yvfRSTU</i>            | BSU34090          | + | 0 | 0 | + | 0 | 0 | 0 | 0 | + | 0 | + | + | ABC transporter (ATP binding protein); ABC transporter (permease);           | -             |
| <b>CssR regulon</b>       | <b>cssR</b>       | + | + | + | + | 0 | 0 | 0 | 0 | 0 | + | 0 | 0 | <b>Protein secretion stress</b>                                              | -             |
| <i>cssRS</i>              | BSU33010          | + | + | + | + | 0 | 0 | 0 | 0 | 0 | + | 0 | 0 | Two-component system of protein secretion stress regulon                     | exp. 12270824 |
| <i>htrB</i>               | BSU33000          | + | + | + | + | 0 | 0 | - | - | - | + | 0 | 0 | HtrA-like serine protease                                                    | exp. 12270824 |
| <i>htrA</i>               | BSU12900          | + | + | + | + | 0 | 0 | 0 | 0 | 0 | 0 | 0 | 0 | Probable serine protease                                                     | exp. 12270824 |
| <b>FapR regulon</b>       | <b>fapR</b>       | + | + | + | + | + | + | + | + | + | + | + | + | <b>Fatty-acid biosynthesis</b>                                               | -             |

|                                |              |                       |                                                                          |               |
|--------------------------------|--------------|-----------------------|--------------------------------------------------------------------------|---------------|
| <i>fabHA-F</i>                 | BSU11330     | + + + + + + + + + +   | 3-oxoacyl-(acyl carrier protein) synthase III; 3-oxoacyl-(acyl-carrier-p | exp. 12737802 |
| <i>fapR-plsX-fabDG-acpA-mc</i> | BSU15880     | + + + + 0 + + + + +   | Fatty-acid biosynthesis                                                  | exp. 12737802 |
| <i>fabI</i>                    | BSU11720     | + + + + + + + + + 0   | Enoyl-(acyl carrier protein) reductase                                   | exp. 12737802 |
| <i>fabHB</i>                   | BSU10170     | + + 0 + 0 0 + + 0 0 + | 3-oxoacyl-(acyl carrier protein) synthase III                            | exp. 12737802 |
| <i>plsC</i>                    | BSU09540     | + + + + - - + - - - - | 1-acyl-sn-glycerol-3-phosphate acyltransferase                           | exp. 12737802 |
| <i>BPUM_0755</i>               | BPUM_0755    | 0 0 + 0 0 0 + 0 0 0 0 | Bifunctional nucleotide sugar epimerase/hydrolase                        | -             |
| <i>Pjdr2_4960</i>              | Pjdr2_4960   | 0 + 0 0 0 0 0 0 0 0 + | Putative beta-ketoacyl-acyl carrier protein synthase II                  | -             |
| <i>accBC-yqhY</i>              | BSU24350     | - - - + - - + - - + - | Acetyl-CoA carboxylase biotin carboxyl carrier subunit; acetyl-CoA ca    | -             |
| <b>ComA regulon</b>            | <b>comA</b>  | + + + + 0 0 0 0 0 0 0 | <b>Late competence genes, production of degradative enzymes and</b>      | -             |
| <i>srfAAAB</i>                 | BSU03480     | + + + + 0 0 0 0 0 0 0 | Surfactin synthetase                                                     | exp. 8387999  |
| <i>srfACAD</i>                 | BSU03510     | + + + + 0 0 0 0 0 0 0 | Surfactin synthetase                                                     | exp. 8387999  |
| <i>BPUM_0322-23</i>            | BPUM_0322    | 0 0 0 + 0 0 0 0 0 0 0 | Nonribosomal peptide synthetase                                          | -             |
| <i>degQ</i>                    | BSU31720     | + + + + 0 0 0 0 0 0 0 | Degradation enzyme regulation protein                                    | exp. 1901055  |
| <i>rapC-phrC</i>               | BSU03770     | + + 0 0 0 0 0 0 0 0 0 | Response regulator aspartate phosphatase; secreted regulator of the      | exp. 15968044 |
| <i>rapA-phrA</i>               | BSU12430     | + + 0 0 0 0 0 0 0 0 0 | Response regulator aspartate phosphatase; secreted regulator of the      | exp. 1378051  |
| <i>rapF-phrF</i>               | BSU37470     | + - - - 0 0 0 0 0 0 0 | Response regulator aspartate phosphatase; secreted regulator of the      | exp. 15968044 |
| <i>rapE-phrE</i>               | BSU25830     | + 0 0 - 0 0 0 0 0 0 0 | Response regulator aspartate phosphatase; secreted regulator of the      | exp. 10629174 |
| <i>pel</i>                     | BSU07560     | + - 0 - 0 0 0 0 0 0 0 | Pectate lyase                                                            | exp. 16091051 |
| <b>RhaR regulon</b>            | <b>rhaR</b>  | + 0 0 + 0 0 0 + 0 + + | <b>Rhamnose utilization</b>                                              | -             |
| <i>rhaEW-rhaR-rhaBMA</i>       | BSU31220     | + 0 0 + 0 0 0 + - + + | Rhamnose utilization                                                     | -             |
| <i>rhaY</i>                    | OB0494       | 0 0 0 - 0 0 0 0 - + 0 | Predicted L-rhamnose permease                                            | -             |
| <i>rhaL</i>                    | BLi03559     | 0 0 0 + 0 0 0 0 0 0 0 | Predicted L-rhamnose isomerase                                           | -             |
| <b>IolR1 regulon</b>           | <b>iolR1</b> | + 0 0 + 0 + 0 + 0 0 + | <b>Inositol utilization</b>                                              | -             |
| <i>GK1894-93-iolI/DEBCAJ</i>   | GK1894       | - - 0 - 0 + 0 - - 0 + | Putative inositol ABC transporter; Inositol utilization                  | -             |
| <i>iolR1 (degA)</i>            | BSU10840     | - 0 0 - 0 - 0 + 0 0 + | Transcriptional regulator of inositol utilization, LacI family           | -             |
| <i>yrbE</i>                    | BSU27770     | + 0 0 0 0 0 0 + 0 0 + | Predicted inositol derivative dehydrogenase                              | -             |
| <i>iolX</i>                    | BSU10850     | + 0 0 + 0 + 0 + - 0 0 | Scyllo-inositol dehydrogenase                                            | -             |
| <i>GK1899-96</i>               | GK1899       | 0 0 0 0 0 + 0 + - 0 - | Predicted inositol derivative dehydrogenases                             | -             |
| <i>BH2222</i>                  | BH2222       | 0 0 0 - 0 0 0 + - 0 0 | Na+:myo-inositol cotransporter                                           | -             |
| <b>IolR regulon</b>            | <b>iolR</b>  | + + 0 + 0 0 0 0 + 0 0 | <b>Myo-inositol catabolism</b>                                           | -             |
| <i>iolABCDEFGHJI</i>           | BSU39760     | + + 0 + 0 - 0 - + 0 - | Inositol utilization                                                     | exp. 9887260  |
| <i>iolRS</i>                   | BSU39770     | + + 0 + 0 0 0 0 + 0 0 | Transcriptional regulator of mio-inositol utilisation; Oxidoreductase    | exp. 9887260  |
| <b>YisR regulon</b>            | <b>yisR</b>  | + + + + + + 0 0 0 0 0 | <b>Multidrug resistance</b>                                              | -             |
| <i>yisQ</i>                    | BSU10820     | + + + + + + - - 0 0 - | Na+-driven multidrug efflux pump                                         | -             |
| <b>AraR regulon</b>            | <b>araR</b>  | + + + + + + 0 + 0 + + | <b>Arabinose utilization</b>                                             | -             |
| <i>araFGH</i>                  | GK1910       | 0 0 0 - 0 + 0 - - 0 - | L-arabinose ABC transporter                                              | -             |
| <i>abnA</i>                    | BSU28810     | + + 0 - 0 0 0 0 0 0 0 | Arabinan endo-1,5-alpha-L-arabinosidase                                  | exp. 14973026 |
| <i>araE</i>                    | BSU33960     | + + + + 0 0 0 0 0 + 0 | L-arabinose-proton symporter                                             | exp. 10417639 |

|                          |                   |   |   |   |   |   |   |   |   |   |   |   |                                                                          |               |
|--------------------------|-------------------|---|---|---|---|---|---|---|---|---|---|---|--------------------------------------------------------------------------|---------------|
| <i>araR</i>              | BSU33970          | + | + | + | + | + | + | 0 | + | 0 | + | + | Transcriptional regulator of arabinose metabolism, GntR family           | exp. 10417639 |
| <i>xsa</i>               | BSU28510          | + | + | 0 | 0 | 0 | 0 | 0 | + | - | 0 | 0 | Alpha-L-arabinofuranosidase                                              | exp. 14973026 |
| <i>araABDLMNPQ-abfA</i>  | BSU28720          | + | + | + | + | + | + | 0 | - | + | + | + | Arabinose utilization                                                    | exp. 10417639 |
| <i>araK</i>              | BPUM_2329         | 0 | 0 | + | + | 0 | 0 | 0 | 0 | 0 | 0 | + | Alternative L-ribulokinase                                               | -             |
| <b>CsoR regulon</b>      | <b>csoR</b>       | + | + | + | + | + | + | + | + | + | + | + | <b>Copper efflux</b>                                                     | -             |
| <i>copA</i>              | BSU33500          | + | + | + | + | + | + | + | + | + | + | + | Copper-transporting ATPase                                               | exp. 18048925 |
| <i>copZ</i>              | BSU33510          | + | + | + | + | + | + | + | + | + | + | + | Copper insertion chaperone and transporter component                     | exp. 18048925 |
| <i>csoR</i>              | BSU33520          | - | - | - | - | + | + | - | - | - | + | + | Repressor of copper utilisation                                          | -             |
| <i>ydhK</i>              | BSU05790          | + | - | 0 | 0 | 0 | - | 0 | 0 | + | + | + | Hypothetical protein                                                     | -             |
| <i>Pjdr2_3010-11</i>     | <i>Pjdr2_3010</i> | 0 | 0 | 0 | 0 | 0 | - | 0 | 0 | 0 | 0 | + | Two component system                                                     | -             |
| <b>YcnK regulon</b>      | <b>ycnK</b>       | + | + | 0 | + | 0 | 0 | 0 | 0 | 0 | 0 | 0 | <b>Copper import</b>                                                     | -             |
| <i>ycnKJI</i>            | BSU03960          | + | + | - | + | 0 | 0 | - | 0 | 0 | 0 | - | Transcriptional regulator of copper import, DeoR family; putative cop    | exp. 19168619 |
| <b>YczG regulon</b>      | <b>yczG</b>       | + | + | + | + | 0 | 0 | + | 0 | 0 | 0 | 0 | <b>Aromatic compound detoxification</b>                                  | -             |
| <i>ycnE-nfrA2</i>        | BSU03870          | + | + | - | + | 0 | 0 | - | - | 0 | 0 | 0 | Putative monooxygenase; NAD(P)H-dependent nitro/flavin reductase         | -             |
| <i>BC1999</i>            | <i>BC1999</i>     | 0 | 0 | 0 | 0 | 0 | 0 | + | 0 | 0 | 0 | 0 | Uncharacterized oxidoreductase                                           | -             |
| <i>yczG</i>              | BSU03880          | + | + | - | + | 0 | 0 | + | 0 | 0 | 0 | 0 | Transcriptional regulator, ArsR family                                   | -             |
| <b>YfmP regulon</b>      | <b>yfmP</b>       | + | + | + | + | 0 | 0 | + | 0 | 0 | 0 | + | <b>Metal efflux</b>                                                      | -             |
| <i>yfmPO</i>             | BSU07390          | + | + | + | + | 0 | - | + | 0 | 0 | 0 | + | Transcriptional regulator of metal efflux transporter expression, MerR   | exp. 14663075 |
| <b>HxlR regulon</b>      | <b>hxlR</b>       | + | + | + | + | 0 | 0 | 0 | 0 | 0 | + | + | <b>Ribulose monophosphate pathway</b>                                    | -             |
| <i>hxlAB</i>             | BSU03460          | + | + | + | + | 0 | 0 | 0 | 0 | 0 | + | + | Ribulose monophosphate pathway                                           | exp. 10572115 |
| <b>YtcD regulon</b>      | <b>ytcD</b>       | + | + | + | + | 0 | 0 | 0 | 0 | 0 | 0 | + | -                                                                        | -             |
| <i>ytcD</i>              | BSU29030          | + | + | + | + | 0 | 0 | 0 | 0 | 0 | 0 | + | Transcriptional regulator, HxlR family                                   | -             |
| <i>ytbDE</i>             | BSU29040          | + | + | + | + | 0 | 0 | 0 | 0 | 0 | 0 | + | Putative efflux transporter, MFS family; putative aldo/keto reductase    | -             |
| <i>BLi02841</i>          | <i>BLi02841</i>   | - | 0 | 0 | + | 0 | 0 | 0 | 0 | 0 | 0 | 0 | Putative peptidase                                                       | -             |
| <b>SinR regulon</b>      | <b>sinR</b>       | + | + | + | + | 0 | 0 | 0 | + | 0 | 0 | 0 | <b>Biofilm formation</b>                                                 | -             |
| <i>epsA-O</i>            | BSU34370          | + | + | + | + | 0 | 0 | 0 | 0 | 0 | 0 | 0 | Exopolysaccharide production                                             | exp. 16430695 |
| <i>yqxM-sipW-tasA</i>    | BSU24640          | + | + | + | + | 0 | 0 | 0 | + | 0 | 0 | - | Lipoprotein for biofilm formation; signal peptidase I, required for TasA | exp. 15661000 |
| <i>slrR</i>              | BSU34380          | + | + | + | + | 0 | 0 | 0 | 0 | 0 | 0 | 0 | Transcriptional repressor of cell separation and motility/antirepressor  | exp. 18647168 |
| <b>YybR/YdeP regulon</b> | <b>yybR/ydeP</b>  | + | + | + | + | 0 | 0 | + | + | + | + | + | <b>Oxidative stress</b>                                                  | -             |
| <i>yybR(ydeP)</i>        | BSU40540 (E       | + | + | - | + | 0 | 0 | + | + | + | + | + | Transcriptional regulator, HxlR family                                   | -             |
| <i>ykfO</i>              | BSU07830          | + | + | - | + | 0 | 0 | + | - | 0 | - | + | Putative NAD(P)H nitroreductase                                          | -             |
| <i>ppaC</i>              | BSU04550          | + | + | - | 0 | 0 | 0 | - | 0 | - | - | - | Putative manganese-dependent inorganic pyrophosphatase                   | -             |
| <i>ydeQ</i>              | BSU05300          | + | 0 | 0 | 0 | 0 | 0 | 0 | 0 | 0 | 0 | 0 | Putative NAD(P)H oxidoreductase                                          | -             |
| <i>ABC0785</i>           | <i>ABC0785</i>    | 0 | 0 | 0 | 0 | 0 | 0 | - | 0 | + | 0 | 0 | Putative nitroreductase                                                  | -             |
| <i>OB0355-56</i>         | <i>OB0355</i>     | 0 | - | 0 | 0 | 0 | 0 | - | 0 | 0 | + | - | Putative oxidoreductase; NADH-dependent FMN reductase                    | -             |
| <i>BH0738</i>            | <i>BH0738</i>     | 0 | 0 | - | 0 | 0 | 0 | + | - | 0 | 0 | 0 | Zinc-containing alcohol dehydrogenase/quinone oxidoreductase ( NA        | -             |
| <b>YodB/CatR regulon</b> | <b>yodB/catR</b>  | + | + | + | + | + | 0 | + | + | 0 | + | + | <b>Oxidative stress</b>                                                  | -             |
| <i>catDE</i>             | BSU08230          | + | + | + | + | 0 | 0 | - | + | - | - | + | Catechol-2,3-dioxygenase                                                 | exp. 20639328 |



|                     |                  |   |   |   |   |   |   |   |   |   |   |   |                                                                         |               |
|---------------------|------------------|---|---|---|---|---|---|---|---|---|---|---|-------------------------------------------------------------------------|---------------|
| <i>ribBD</i>        | <i>BPUM_3531</i> | 0 | 0 | + | 0 | 0 | 0 | + | 0 | 0 | 0 | + | Riboflavin biosynthesis                                                 |               |
| <i>ytkL</i>         | <i>BSU29410</i>  | - | - | - | - | - | - | - | - | - | - | + | Metal-dependent hydrolase                                               |               |
| <i>yodC</i>         | <i>BSU19550</i>  | + | + | + | + | + | 0 | + | + | 0 | 0 | 0 | Putative NAD(P)H nitroreductase                                         | exp. 17158660 |
| <i>yodB</i>         | <i>BSU19540</i>  | + | + | + | + | + | 0 | + | - | 0 | 0 | + | Transcriptional regulator of oxidative stress, HxIR family              |               |
| <i>BLi02273</i>     | <i>BLi02273</i>  | 0 | 0 | - | + | 0 | - | 0 | - | - | 0 | 0 | Putative oxidoreductase                                                 |               |
| <i>spxA</i>         | <i>BSU11500</i>  | + | + | + | + | - | - | + | - | - | - | 0 | RNA polymerase-binding transcriptional regulator of oxidative stress    | exp. 17158660 |
| <i>azoR1</i>        | <i>BSU19230</i>  | + | 0 | 0 | + | 0 | 0 | - | - | 0 | 0 | + | FMN-dependent NADH-azoreductase                                         | exp. 18208493 |
| <i>azoR2</i>        | <i>BC2194</i>    | - | - | - | - | 0 | - | + | - | 0 | 0 | 0 | FMN-dependent NADH-azoreductase                                         |               |
| <i>catR</i>         | <i>BSU33680</i>  | - | - | - | + | 0 | 0 | + | - | - | - | - | Transcriptional regulator of oxidative stress response, HxIR family     |               |
| <b>PadR regulon</b> | <b>padR</b>      | + | + | + | + | 0 | 0 | 0 | 0 | 0 | 0 | 0 | <b>Phenolic acid stress response</b>                                    |               |
| <i>yveFG-padC</i>   | <i>BSU34420</i>  | + | + | + | + | 0 | 0 | 0 | 0 | 0 | 0 | 0 | Phenolic acid decarboxylase                                             | exp. 21685295 |
| <i>padR</i>         | <i>BSU08340</i>  | - | - | + | - | 0 | 0 | 0 | 0 | 0 | 0 | 0 | Transcriptional regulator of phenolic acid stress response, PadR fam    |               |
| <b>YdfF regulon</b> | <b>ydfF</b>      | + | 0 | 0 | + | 0 | 0 | 0 | + | + | 0 | 0 |                                                                         |               |
| <i>ydfE</i>         | <i>BSU05380</i>  | + | 0 | 0 | + | 0 | 0 | 0 | + | + | 0 | 0 | Putative flavoprotein                                                   |               |
| <i>ydfF</i>         | <i>BSU05390</i>  | + | 0 | 0 | + | 0 | 0 | 0 | + | + | 0 | 0 | Transcriptional regulator, ArsR family                                  |               |
| <i>ABC3713</i>      | <i>ABC3713</i>   | 0 | 0 | 0 | + | 0 | 0 | 0 | 0 | + | 0 | 0 | Predicted carboxyphosphoenolpyruvate phosphonmutase                     |               |
| <b>YybA regulon</b> | <b>yybA</b>      | + | + | 0 | + | 0 | 0 | 0 | + | + | + | + | <b>Polyamine homeostasis</b>                                            |               |
| <i>yybA</i>         | <i>BSU40710</i>  | + | + | 0 | + | 0 | 0 | 0 | + | + | + | + | Transcriptional regulator, MarR family                                  |               |
| <i>paiA</i>         | <i>BSU32150</i>  | + | + | 0 | + | 0 | 0 | 0 | + | + | + | 0 | N1-spermidine/spermine acetyltransferase                                |               |
| <i>paiB</i>         | <i>BSU32140</i>  | + | 0 | 0 | + | 0 | 0 | 0 | 0 | 0 | 0 | 0 | Putative FMN-binding protein                                            |               |
| <i>yyaS</i>         | <i>BSU40730</i>  | + | + | 0 | + | 0 | 0 | 0 | + | 0 | 0 | 0 | Putative integral inner membrane protein                                |               |
| <i>yyaT</i>         | <i>BSU40720</i>  | + | + | 0 | 0 | 0 | 0 | 0 | 0 | - | 0 | + | Putative N-acetyltransferase                                            |               |
| <b>BsdA regulon</b> | <b>bsdA</b>      | + | + | 0 | + | 0 | 0 | 0 | 0 | 0 | 0 | 0 | <b>Salicylic acid resistance</b>                                        |               |
| <i>bsdBCD1D2</i>    | <i>BSU03630</i>  | + | + | 0 | + | 0 | 0 | 0 | 0 | 0 | 0 | 0 | 4-hydroxybenzoate decarboxylase                                         | exp. 17295427 |
| <i>bsdA</i>         | <i>BSU03790</i>  | + | + | 0 | + | 0 | 0 | 0 | 0 | 0 | 0 | 0 | Transcriptional regulator of salicylic acid resistance, LysR family     |               |
| <b>YuaC regulon</b> | <b>yuaC</b>      | + | + | + | + | 0 | 0 | 0 | 0 | + | 0 | 0 | <b>Osmotic stress response</b>                                          |               |
| <i>gbsAB</i>        | <i>BSU31050</i>  | + | + | + | + | 0 | 0 | 0 | 0 | + | 0 | 0 | Betaine aldehyde dehydrogenase; alcohol dehydrogenase                   |               |
| <b>YhgD regulon</b> | <b>yhgD</b>      | + | + | + | + | + | + | + | + | + | 0 | 0 |                                                                         |               |
| <i>yhgDE</i>        | <i>BSU10150</i>  | + | + | + | + | + | + | + | + | + | 0 | 0 | Transcriptional regulator, TetR/AcrR family; Predicted membrane pro     |               |
| <b>KdgR regulon</b> | <b>kdgR</b>      | + | 0 | + | + | 0 | 0 | 0 | 0 | 0 | 0 | 0 | <b>Pectin utilization</b>                                               |               |
| <i>kdgRKAT</i>      | <i>BSU22120</i>  | + | 0 | + | + | 0 | 0 | 0 | 0 | 0 | 0 | 0 | Galacturonate utilization                                               | exp. 17322190 |
| <i>kduID</i>        | <i>BSU22130</i>  | + | 0 | + | + | 0 | 0 | 0 | - | - | - | - | Galacturonate utilization                                               | exp. 17322190 |
| <b>GamR regulon</b> | <b>gamR</b>      | + | 0 | 0 | + | 0 | 0 | 0 | + | + | + | 0 | <b>Predicted glucosamine utilization</b>                                |               |
| <i>lich-ywbABC</i>  | <i>BLi00335</i>  | 0 | 0 | 0 | + | 0 | 0 | 0 | + | + | + | 0 | 6-phospho-beta-glucosidase; PTS system, cellobiose specific             |               |
| <i>chiA</i>         | <i>BH0916</i>    | 0 | 0 | 0 | - | 0 | 0 | - | + | - | - | - | Chitinase                                                               |               |
| <i>gamAP</i>        | <i>BSU02360</i>  | + | 0 | 0 | 0 | 0 | 0 | 0 | 0 | 0 | 0 | 0 | Glucosamine-6-phosphate deaminase; Glucosamine-specific PTS sy          |               |
| <i>gamR</i>         | <i>BSU02370</i>  | + | 0 | 0 | + | 0 | 0 | 0 | - | - | + | 0 | Predicted transcriptional regulator of glucosamine utilization, GntR fa |               |
| <i>BH0913</i>       | <i>BH0913</i>    | 0 | 0 | 0 | + | 0 | 0 | - | + | + | + | 0 | Cellobiose phosphotransferase system YdjC-like protein                  |               |

| <b>YvbF/YvaV regulon</b>       | <b>YvbF/YvaV</b> | <b>+</b> | <b>+</b> | <b>+</b> | <b>+</b> | <b>0</b> | <b>0</b> | <b>0</b> | <b>0</b> | <b>+</b> | <b>0</b> | <b>0</b> | <b>Osmoregulated choline transport</b>                                                  |
|--------------------------------|------------------|----------|----------|----------|----------|----------|----------|----------|----------|----------|----------|----------|-----------------------------------------------------------------------------------------|
| <i>yvbF</i>                    | BSU33840         | +        | +        | 0        | 0        | 0        | 0        | 0        | 0        | 0        | 0        | 0        | Transcriptional regulator of choline transport, MarR family                             |
| <i>yvbA</i>                    | BSU33740         | +        | +        | +        | +        | 0        | 0        | 0        | 0        | -        | 0        | 0        | Transcriptional regulator of choline transport, MarR family                             |
| <i>opuCA-CB-CC-CD</i>          | BSU33830         | +        | +        | 0        | 0        | 0        | 0        | 0        | 0        | 0        | 0        | 0        | Osmotically activated choline ABC transporter                                           |
| <i>opuBA-BB-BC-BB</i>          | BSU33730         | +        | +        | +        | +        | 0        | 0        | 0        | 0        | -        | 0        | -        | Osmotically activated L-carnitine/crotonobetaine/gamma-butyrobetaine                    |
| <b>CcpA regulon</b>            | <b>ccpA</b>      | <b>+</b> | <b>Carbon catabolite repression</b>                                                     |
| <i>cimH</i>                    | BSU38770         | +        | +        | 0        | -        | 0        | 0        | 0        | 0        | 0        | 0        | 0        | L-Malate Citrate symporter (TC 2.A.24.2.4) exp. 10666464                                |
| <i>mutBA-BH2954</i>            | GK2371           | 0        | 0        | 0        | 0        | +        | +        | 0        | -        | 0        | 0        | 0        | Methylmalonyl-CoA mutase, small subunit; Methylmalonyl-CoA mutase                       |
| <i>ABC0302</i>                 | ABC0302          | 0        | 0        | 0        | -        | 0        | 0        | 0        | 0        | +        | +        | 0        | Predicted transcriptional repressor of the hexuronate utilization operon                |
| <i>amyE</i>                    | BSU03040         | +        | +        | 0        | 0        | 0        | 0        | 0        | 0        | 0        | 0        | 0        | Alpha-amylase precursor exp. 15773986                                                   |
| <i>licT-bglP1</i>              | BSU39080         | -        | -        | -        | -        | 0        | 0        | 0        | +        | +        | 0        | 0        | Beta-glucoside bgl operon antiterminator, BglG family; PTS system, IIC                  |
| <i>ylbBC</i>                   | BSU14950         | +        | +        | +        | +        | -        | -        | -        | -        | -        | -        | -        | CBS domain protein; Uncharacterized secreted protein with SCP domain                    |
| <i>mrp</i>                     | BSU01540         | +        | +        | +        | +        | +        | -        | +        | -        | -        | -        | -        | Scaffold protein for [4Fe-4S] cluster assembly AppC, MRP-like                           |
| <i>lplBC-upgB</i>              | ABC1135          | 0        | 0        | 0        | 0        | 0        | 0        | 0        | +        | +        | 0        | +        | Transmembrane lipoprotein; Polysaccharide ABC transporter permease                      |
| <i>gntRKPZ</i>                 | BSU40050         | +        | 0        | 0        | +        | 0        | 0        | 0        | 0        | +        | +        | 0        | Gluconate operon transcriptional repressor; Gluconokinase; Gluconate exp. 15773986      |
| <i>yqqQ-glcK</i>               | BSU24850         | +        | -        | +        | -        | +        | -        | +        | -        | -        | -        | -        | Hypothetical Cytosolic Protein; Glucokinase                                             |
| <i>kdgRKAT</i>                 | BSU22120         | +        | 0        | +        | +        | 0        | 0        | 0        | 0        | 0        | 0        | 0        | Transcriptional regulator of pectin utilization, Lacl family; 2-dehydro-3-exp. 10666464 |
| <i>BH3448-46</i>               | BH3448           | 0        | 0        | 0        | +        | 0        | -        | 0        | +        | 0        | 0        | +        | ABC-type sugar transport system, periplasmic component; Two-component                   |
| <i>yesOPQR-rhgR-yesTUVWXYZ</i> | BSU06970         | +        | 0        | 0        | +        | 0        | 0        | 0        | 0        | 0        | 0        | +        | Intracellular unsaturated galacturonyl hydrolase; transcriptional regul                 |
| <i>manR</i>                    | BSU12000         | +        | +        | 0        | +        | 0        | 0        | 0        | 0        | 0        | 0        | 0        | Transcriptional regulator of mannose utilization, BglG family exp. 20139185             |
| <i>citST</i>                   | BSU07580         | +        | +        | -        | +        | 0        | 0        | +        | +        | +        | -        | 0        | Sensor kinase CitA, DpiB; Transcriptional regulatory protein exp. 16842348              |
| <i>BH3680-82-xynB-BH3684</i>   | BH3680           | 0        | 0        | 0        | 0        | 0        | 0        | 0        | +        | 0        | +        | +        | Predicted beta-xyloside ABC transporter, substrate-binding compone                      |
| <i>levDEFG-sacC</i>            | BSU27070         | +        | 0        | 0        | +        | 0        | 0        | 0        | 0        | 0        | +        | 0        | Fructose-specific PTS-system; Levanase exp. 7592486                                     |
| <i>sdcS</i>                    | ABC3994          | 0        | 0        | 0        | +        | 0        | 0        | 0        | 0        | +        | +        | 0        | Sodium:dicarboxylate cotransporter; di- and tricarboxylate transport                    |
| <i>yhaR</i>                    | BSU09880         | +        | +        | -        | +        | -        | -        | -        | 0        | 0        | 0        | 0        | Enoyl-CoA hydratase                                                                     |
| <i>citMII</i>                  | BH0745           | 0        | 0        | +        | 0        | 0        | 0        | 0        | +        | +        | 0        | 0        | Magnesium citrate secondary transporter                                                 |
| <i>cspD</i>                    | BSU21930         | +        | +        | -        | +        | -        | -        | -        | 0        | 0        | 0        | 0        | Cold-shock protein, molecular chaperone, RNA-helicase co-factor                         |
| <i>nirC</i>                    | BSU38060         | +        | 0        | 0        | -        | +        | 0        | +        | 0        | 0        | 0        | 0        | Formate/nitrite family of transporters                                                  |
| <i>ABC3348-gatABC</i>          | ABC3348          | 0        | 0        | 0        | 0        | 0        | 0        | 0        | +        | +        | +        | 0        | Predicted galactitol operon regulator (transcriptional antiterminator),                 |
| <i>citH</i>                    | BSU39060         | +        | +        | 0        | 0        | 0        | 0        | +        | 0        | 0        | 0        | 0        | Ca2+/citrate complex secondary transporter                                              |
| <i>ywcBA</i>                   | BSU38230         | -        | 0        | -        | -        | 0        | +        | -        | 0        | +        | +        | 0        | Hypothetical Membrane Spanning Protein; Putative sodium:proline s                       |
| <i>ccpC</i>                    | BSU14140         | +        | +        | -        | -        | 0        | -        | +        | -        | -        | -        | 0        | CBS domain containing protein; Transcriptional repressor of citB and exp. 11985717      |
| <i>dagA</i>                    | BSU18610         | -        | 0        | 0        | +        | 0        | 0        | 0        | +        | 0        | +        | -        | Putative amino acid transporter                                                         |
| <i>licR</i>                    | BSU38600         | -        | -        | +        | +        | 0        | 0        | 0        | 0        | -        | -        | 0        | Transcriptional antiterminator of lichenan operon, BglG family                          |
| <i>araE</i>                    | OB2796           | +        | +        | +        | +        | 0        | 0        | 0        | 0        | 0        | +        | 0        | Arabinose-proton symporter exp. 12949161                                                |
| <i>yxjC-scoAB-yxjF</i>         | BSU39000         | +        | +        | 0        | 0        | 0        | 0        | -        | 0        | +        | 0        | 0        | D-beta-hydroxybutyrate permease; Butyrate-acetoacetate CoA-trans exp. 10666464          |
| <i>tctCBA</i>                  | ABC1013          | 0        | 0        | 0        | +        | 0        | 0        | 0        | 0        | +        | +        | 0        | Tricarboxylate transpor                                                                 |
| <i>uxuA-fabG</i>               | BH0701           | 0        | 0        | 0        | +        | 0        | 0        | 0        | +        | 0        | +        | 0        | Mannonate dehydratase; D-mannonate oxidoreductase                                       |

|                         |                 |   |   |   |   |   |   |   |   |   |   |   |                                                                        |               |
|-------------------------|-----------------|---|---|---|---|---|---|---|---|---|---|---|------------------------------------------------------------------------|---------------|
| <i>dctPMQ-BH0704</i>    | <i>BH0705</i>   | 0 | 0 | 0 | - | 0 | 0 | 0 | + | - | + | 0 | TRAP-type C4-dicarboxylate transport system; Alpha-glucosidase         | -             |
| <i>abnA</i>             | <i>BSU28810</i> | + | + | 0 | + | 0 | 0 | 0 | 0 | 0 | 0 | 0 | Arabinan endo-1,5-alpha-L-arabinosidase                                | exp. 17827291 |
| <i>dctA</i>             | <i>BSU04470</i> | + | + | + | 0 | 0 | 0 | 0 | 0 | 0 | 0 | 0 | C4-dicarboxylate transport protein                                     | exp. 10708364 |
| <i>ganB</i>             | <i>BSU34120</i> | + | 0 | 0 | + | 0 | 0 | 0 | + | 0 | 0 | 0 | Arabinogalactan endo-1,4-beta-galactosidase precursor                  | -             |
| <i>phoPR</i>            | <i>BSU29110</i> | + | + | - | + | - | - | - | - | - | - | - | Alkaline phosphatase synthesis transcriptional regulatory protein Pho  | exp. 16452408 |
| <i>rmgR</i>             | <i>BSU30150</i> | - | 0 | - | - | 0 | 0 | 0 | + | + | 0 | - | Transcriptional regulator of rhamnogalacturonides utilization, AraC fa | -             |
| <i>trePAR</i>           | <i>BSU07800</i> | + | + | + | + | - | - | + | + | - | 0 | 0 | PTS system, trehalose-specific enzyme II, BC component; Trehalose      | exp. 10666464 |
| <i>msmX</i>             | <i>ABC1514</i>  | + | + | + | + | + | - | 0 | + | + | + | 0 | Maltose/maltodextrin transport ATP-binding protein                     | exp. 10666464 |
| <i>cstA</i>             | <i>BSU28710</i> | + | + | + | + | 0 | 0 | 0 | 0 | 0 | 0 | 0 | Carbon starvation-induced membrane protein                             | -             |
| <i>nupC-pdp</i>         | <i>BSU39430</i> | + | + | + | + | - | 0 | 0 | 0 | 0 | 0 | 0 | Pyrimidine-nucleoside Na+(H+) cotransporter; Pyrimidine-nucleoside     | -             |
| <i>galT</i>             | <i>BSU38190</i> | + | + | + | + | 0 | - | 0 | - | + | 0 | - | Galactose-1-phosphate uridylyltransferase                              | exp. 10666464 |
| <i>galKE</i>            | <i>BSU39410</i> | - | + | + | + | 0 | - | 0 | - | + | 0 | - | Galactokinase; UDP-glucose 4-epimerase                                 | -             |
| <i>ywfl</i>             | <i>BSU37670</i> | + | + | + | + | - | - | - | - | + | - | - | Predicted heme peroxidase involved in anaerobic stress response        | -             |
| <i>glcDF</i>            | <i>BSU28680</i> | + | + | - | + | + | - | - | - | - | - | 0 | Glycolate oxidase, subunit GlcD; Predicted glycolate oxidase iron-su   | -             |
| <i>sucCD</i>            | <i>BSU16090</i> | + | + | + | + | - | - | - | - | - | - | - | Succinyl-CoA ligase [ADP-forming]                                      | -             |
| <i>ykoM</i>             | <i>BSU13340</i> | + | + | + | + | 0 | 0 | 0 | 0 | 0 | 0 | 0 | Putative transcriptional regulator, MarR family                        | -             |
| <i>acoABCL</i>          | <i>BSU08060</i> | + | + | + | + | 0 | 0 | - | - | - | 0 | 0 | Acetoin dehydrogenase E1 component alpha-subunit; Acetoin dehyd        | exp. 10666464 |
| <i>ylbP</i>             | <i>BSU15100</i> | + | + | + | + | 0 | 0 | 0 | - | + | + | 0 | Uncharacterized N-acetyltransferase                                    | -             |
| <i>araR</i>             | <i>BSU39970</i> | + | + | + | + | - | - | 0 | - | 0 | + | - | Transcriptional repressor of arabinoside utilization operon, GntR fam  | -             |
| <i>hutPHUIGM</i>        | <i>BSU39340</i> | + | + | 0 | 0 | 0 | + | + | + | - | 0 | 0 | Histidine utilization                                                  | exp. 8144455  |
| <i>cccA</i>             | <i>BSU25190</i> | + | + | + | + | - | - | - | - | - | - | - | Membrane-attached cytochrome c550                                      | exp. 11361075 |
| <i>glvARC</i>           | <i>BSU08180</i> | + | + | - | + | 0 | 0 | 0 | 0 | + | 0 | 0 | Maltose utilization                                                    | exp. 11489864 |
| <i>dapA-eutG</i>        | <i>ABC0222</i>  | 0 | 0 | + | + | 0 | 0 | 0 | 0 | + | 0 | 0 | Dihydrodipicolinate synthase family; Alcohol dehydrogenase             | -             |
| <i>kdgT-hop-pdxA</i>    | <i>ABC0308</i>  | 0 | 0 | + | + | 0 | 0 | 0 | 0 | + | + | - | 2-keto-3-deoxygluconate permease (KDG permease); Candidate typ         | -             |
| <i>bglPH</i>            | <i>BSU39270</i> | + | + | + | + | 0 | 0 | 0 | 0 | 0 | 0 | 0 | Aryl-phospho-beta-glucoside utilization                                | exp. 8626332  |
| <i>citM</i>             | <i>BSU07610</i> | + | + | + | + | 0 | - | - | - | - | 0 | 0 | Mg(2+) Citrate transporter (TC 2.A.11.1.1)                             | exp. 10666464 |
| <i>abnB</i>             | <i>BSU39330</i> | + | + | - | + | 0 | 0 | 0 | + | + | 0 | 0 | Alpha-N-arabinofuranosidase 2                                          | -             |
| <i>licBCAH</i>          | <i>BSU38590</i> | + | + | + | + | 0 | 0 | 0 | 0 | 0 | 0 | 0 | lichenan-, cellobiose-specific PTS system; 6-phospho-beta-glucosida    | exp. 10559165 |
| <i>araFGH</i>           | <i>ABC0409</i>  | 0 | 0 | 0 | + | - | + | - | + | + | 0 | - | L-arabinose ABC transporter                                            | -             |
| <i>gatCAB</i>           | <i>BSU06670</i> | + | + | + | + | - | - | - | - | - | - | - | Aspartyl/Glutamyl-tRNA amidotransferase subunit C; Aspartyl/Gluta      | -             |
| <i>yqgX</i>             | <i>BSU24790</i> | + | + | + | + | - | - | - | + | + | - | - | Similar to Hydroxyacylglutathione hydrolase, but in an organism lack   | -             |
| <i>glpTQ</i>            | <i>BSU02140</i> | + | + | + | + | 0 | 0 | + | 0 | 0 | 0 | 0 | MFS family major facilitator transporter, glycerol-3-phosphate:cation  | -             |
| <i>drm-punA</i>         | <i>BSU23500</i> | + | + | + | + | + | - | + | - | - | - | - | Phosphopentomutase; Purine nucleoside phosphorylase                    | -             |
| <i>acuABC</i>           | <i>BSU29690</i> | + | + | + | + | + | - | - | - | - | - | - | Acetyltransferase AcuA, acetyl-CoA synthetase inhibitor; Component     | exp. 7913927  |
| <i>apbA-yIIA</i>        | <i>BSU15110</i> | + | + | + | + | - | - | - | - | + | - | - | 2-dehydropantoate 2-reductase; Hypothetical membrane spanning p        | -             |
| <i>BPUM_3238-36-pmi</i> | <i>BSU35790</i> | + | - | + | 0 | 0 | + | 0 | + | 0 | - | - | Predicted beta-glucoside-regulated ABC transport system; Mannose-      | -             |
| <i>cycB-ganPQA</i>      | <i>BSU34160</i> | + | 0 | + | + | - | 0 | - | + | + | 0 | - | Maltose/maltodextrin ABC transporter; Beta-galactosidase               | -             |
| <i>ytcpQ</i>            | <i>BSU30170</i> | + | 0 | + | + | 0 | 0 | 0 | + | + | - | - | ABC superfamily ATP binding cassette transporter, membrane protei      | -             |

|                                            |          |   |   |   |   |   |   |   |   |   |   |   |                                                                                  |               |
|--------------------------------------------|----------|---|---|---|---|---|---|---|---|---|---|---|----------------------------------------------------------------------------------|---------------|
| <i>bgIS</i>                                | BSU39070 | + | + | + | 0 | 0 | 0 | 0 | + | 0 | 0 | - | Endo-beta-1,3-1,4 glucanase (Licheninase)                                        | exp. 8245831  |
| <i>xynPB</i>                               | BSU17570 | + | + | + | 0 | 0 | 0 | 0 | 0 | + | - | - | Putative H <sup>+</sup> -xyloside symporter; Beta-xylosidase                     | exp. 9973552  |
| <i>kduID</i>                               | BSU22130 | + | 0 | + | + | 0 | 0 | 0 | + | + | - | - | 4-deoxy-L-threo-5-hexosulose-uronate ketol-isomerase; 2-deoxy-D-g                |               |
| <i>ackA</i>                                | BSU29470 | + | + | + | + | + | - | - | - | - | - | 0 | Acetate kinase                                                                   | exp. 8226682  |
| <i>lrgAB</i>                               | BSU28910 | + | + | + | + | 0 | 0 | + | 0 | 0 | 0 | - | Penicillin resistance                                                            | -             |
| <i>glsA1-glnT</i>                          | BSU02430 | + | + | + | + | 0 | 0 | - | + | 0 | - | - | Glutaminase; Glutamine permease                                                  | -             |
| <i>sdhCAB-ysmA</i>                         | BSU28450 | + | + | + | + | - | - | + | - | - | + | - | Succinate dehydrogenase cytochrome b558 subunit; Succinate dehy-                 | -             |
| <i>citZ-icd-mdh</i>                        | BSU29140 | + | + | + | + | + | - | - | - | + | - | - | Citrate synthase (si); Isocitrate dehydrogenase [NADP]; Malate dehy              | exp. 12100558 |
| <i>fruRKA</i>                              | BSU14380 | + | + | + | + | + | - | + | - | - | - | 0 | Transcriptional repressor of the fructose operon, DeoR family; Tagat-            | -             |
| <i>yqgY</i>                                | BSU24780 | + | + | + | + | - | - | - | - | + | + | + | Uncharacterized short membrane protein                                           | -             |
| <i>yqgW</i>                                | BSU24800 | + | + | + | + | - | - | - | + | + | - | 0 | Alkaliphily related protein                                                      | -             |
| <i>uxaC-exuM-yjmCD-uxuA-yjmF-exuTR-uxu</i> | BSU12300 | + | + | + | + | 0 | 0 | 0 | 0 | + | 0 | - | Uronate isomerase; Melibiose carrier protein, Na <sup>+</sup> /melibiose symport | exp. 10666464 |
| <i>msmREFG-melA</i>                        | BSU30260 | + | + | + | + | 0 | 0 | 0 | + | - | 0 | - | MSM (multiple sugar metabolism) operon regulatory protein; Multiple              | -             |
| <i>gmuBACDREFG</i>                         | BSU05810 | + | + | + | + | 0 | + | 0 | + | + | + | 0 | PTS system, cellobiose-specific IIB component; PTS system, cellobio              | exp. 18223082 |
| <i>pta</i>                                 | BSU37660 | + | + | + | + | - | - | - | + | + | - | 0 | Phosphate acetyltransferase                                                      | exp. 10559153 |
| <i>xylAB</i>                               | BSU17600 | + | + | + | + | 0 | + | 0 | + | + | - | - | Xylose isomerase; Xylulose kinase                                                | exp. 15773986 |
| <i>acoR</i>                                | BSU08100 | + | + | + | + | 0 | 0 | + | + | 0 | 0 | 0 | Transcriptional activator of acetoin dehydrogenase operon AcoR                   | exp. 11274109 |
| <i>ndk</i>                                 | BSU22720 | + | + | + | + | + | + | - | 0 | + | - | - | Nucleoside diphosphate kinase                                                    | -             |
| <i>yvfVWY</i>                              | BSU34050 | + | + | - | + | + | + | + | + | + | + | 0 | Predicted L-lactate dehydrogenase, Fe-S oxidoreductase subunit; Pr               | -             |
| <i>lutR</i>                                | BSU34180 | + | + | - | - | + | + | - | + | - | - | 0 | Lactate-responsive regulator LldR in Firmicutes, GntR family                     | -             |
| <i>ganR</i>                                | BSU34170 | - | - | 0 | + | 0 | 0 | 0 | + | - | 0 | 0 | Galactose operon repressor, GalR-LacI family of transcriptional regu             | -             |
| <i>lctP</i>                                | BH1831   | 0 | 0 | 0 | 0 | + | 0 | 0 | + | + | + | 0 | L-lactate permease                                                               | -             |
| <i>odhAB</i>                               | BSU19370 | + | + | + | + | 0 | + | + | + | + | + | + | 2-oxoglutarate dehydrogenase E1 component; 2-oxoglutarate dehyd                  | -             |
| <i>sacPA</i>                               | BSU38050 | + | + | + | + | + | - | + | + | 0 | 0 | 0 | PTS sucrose-specific enzyme IIBC component; Sucrose-6-phosphat                   | -             |
| <i>sacK</i>                                | BC0773   | 0 | 0 | 0 | 0 | + | 0 | + | + | 0 | 0 | 0 | Fructokinase                                                                     | -             |
| <i>lcfA</i>                                | BSU28560 | + | + | + | + | + | - | - | + | - | - | - | Long-chain-fatty-acid--CoA ligase                                                | exp. 10666464 |
| <i>sigL</i>                                | BSU34200 | + | + | + | + | + | + | + | - | + | + | 0 | DNA-directed RNA polymerase sigma subunit SigL                                   | exp. 16166551 |
| <i>mtlR</i>                                | BSU04160 | + | + | + | + | + | + | 0 | + | - | + | + | mannitol regulator                                                               | -             |
| <i>mtlAFD</i>                              | BSU03981 | + | + | + | + | + | + | 0 | + | - | + | + | PTS family mannitol-permease II, BC component; Mannitol operon a                 | -             |
| <i>rbsRKDACB</i>                           | BSU35910 | + | + | + | - | + | - | + | - | + | + | - | Ribose operon repressor, LacI family transcriptional regulator; Riboki           | exp. 7592460  |
| <i>ioIABCDEFGHIJ</i>                       | BSU39760 | + | + | 0 | + | 0 | - | + | + | + | + | - | Methylmalonate-semialdehyde dehydrogenase [inositol]; 5-deoxy-glu                | exp. 10666464 |
| <i>araABDLMNQP-abfA</i>                    | BSU27310 | + | + | + | + | - | - | 0 | + | + | + | - | L-arabinose isomerase; Ribulokinase; L-ribulose-5-phosphate 4-epim               | exp. 12949161 |
| <i>xsa</i>                                 | BSU28510 | + | + | - | - | 0 | 0 | 0 | - | + | - | - | Alpha-N-arabinofuranosidase 2???                                                 | -             |
| <i>ilvBHC-leuABCD</i>                      | BSU28310 | + | + | - | - | - | - | - | - | - | + | - | Acetolactate synthase large subunit; Acetolactate synthase small sub             | exp. 15916605 |
| <i>dat</i>                                 | BLi02962 | 0 | 0 | + | + | + | + | + | 0 | 0 | 0 | 0 | Branched-chain amino acid aminotransferase                                       | -             |
| <i>acsA</i>                                | BSU29680 | + | + | + | + | + | - | - | + | + | + | + | Acetyl-coenzyme A synthetase                                                     | exp. 7913927  |
| <i>glpFK</i>                               | BSU09280 | + | - | + | + | - | + | + | + | + | + | 0 | Glycerol uptake facilitator protein; Glycerol kinase                             | exp. 11929549 |
| <i>mmgABCDE-prpB</i>                       | BSU24170 | + | + | + | + | + | + | - | + | + | + | - | 3-ketoacyl-CoA thiolase [isoleucine degradation]; 3-hydroxybutyryl-C             | exp. 8759838  |

|                             |             |   |   |   |   |   |   |   |   |   |   |   |                                                                                                         |               |
|-----------------------------|-------------|---|---|---|---|---|---|---|---|---|---|---|---------------------------------------------------------------------------------------------------------|---------------|
| <i>yngIHHBGFE</i>           | BSU18250    | + | + | + | + | - | + | - | + | + | - | 0 | Long-chain fatty-acid-CoA ligase; Biotin carboxylase of methylcrotonyl-CoA synthetase                   | -             |
| <b>CodY regulon</b>         | <b>codY</b> | + | + | + | + | + | + | + | + | + | + | + | <b>Global regulator of nutrient limitation and amino acid metabolism</b>                                | -             |
| <i>acuABC</i>               | BSU29690    | + | + | + | + | + | + | - | - | + | - | - | Acetyltransferase AcuA, acetyl-CoA synthetase inhibitor; Component of the acetyl-CoA synthetase complex | -             |
| <i>acsA</i>                 | BSU29680    | + | + | + | + | + | + | - | - | - | - | - | Acetyl-coenzyme A synthetase                                                                            | exp. 10231480 |
| <i>gltO</i>                 | BPUM_0421   | 0 | 0 | + | - | + | 0 | + | + | + | + | 0 | Proton/sodium-glutamate symport protein                                                                 | -             |
| <i>srfAAAB-comS-srfACAD</i> | BSU03480    | + | + | + | + | 0 | 0 | 0 | 0 | 0 | 0 | 0 | Surfactin synthetase                                                                                    | exp. 8830686  |
| <i>serA</i>                 | BSU23070    | + | + | + | + | + | + | 0 | - | - | - | - | D-3-phosphoglycerate dehydrogenase                                                                      | -             |
| <i>opuE</i>                 | BSU06660    | + | + | + | + | 0 | 0 | + | 0 | 0 | 0 | 0 | Sodium/proline symporter                                                                                | -             |
| <i>comK</i>                 | BSU10420    | + | + | + | + | 0 | - | - | 0 | 0 | + | 0 | Competence transcription factor                                                                         | exp. 8830686  |
| <i>yuiABC</i>               | BSU32090    | + | + | + | - | + | + | 0 | - | 0 | 0 | 0 | Conserved hypothetical proteins                                                                         | -             |
| <i>BH3439</i>               | BH3439      | 0 | 0 | 0 | + | 0 | 0 | + | + | + | - | 0 | Sodium/proline symporter                                                                                | -             |
| <i>yocS</i>                 | BSU19350    | + | + | + | + | 0 | 0 | 0 | - | - | + | 0 | Sodium-dependent transporter                                                                            | -             |
| <i>ilvA</i>                 | BSU21770    | + | + | + | + | + | - | - | - | - | 0 | - | Threonine dehydratase biosynthetic                                                                      | exp. 12618455 |
| <i>dppABCDE</i>             | BSU12920    | + | + | + | + | 0 | 0 | 0 | 0 | - | + | 0 | Dipeptide-binding ABC transporter                                                                       | exp. 8793880  |
| <i>lutABC</i>               | BSU34050    | - | - | + | - | - | - | + | + | - | - | 0 | Predicted L-lactate dehydrogenase                                                                       | -             |
| <i>lutR</i>                 | BSU34180    | - | - | + | - | + | - | - | + | - | + | 0 | Transcriptional regulator of L-lactate utilization, GntR family                                         | -             |
| <i>lutP</i>                 | BSU34190    | - | - | 0 | - | + | - | 0 | + | - | - | 0 | L-lactate permease                                                                                      | -             |
| <i>spo0A</i>                | BSU24220    | - | - | + | - | + | + | + | + | - | - | - | Stage 0 sporulation two-component response regulator (Spo0A)                                            | -             |
| <i>yuxJ-pbpD-yuxK</i>       | BSU31480    | + | + | - | + | 0 | 0 | 0 | 0 | - | 0 | 0 | MFS family major facilitator transporter; Multimodular transpeptidase                                   | -             |
| <i>liuR-Aflv_1280-81</i>    | Aflv_1279   | 0 | 0 | 0 | 0 | + | + | 0 | 0 | 0 | 0 | 0 | Predicted transcriptional regulator LiuR of leucine degradation pathway                                 | -             |
| <i>ytcl</i>                 | BSU29560    | - | - | - | + | - | - | + | + | + | + | - | Acyl-coenzyme A synthetases/AMP-(fatty) acid ligases                                                    | -             |
| <i>ycjHGF</i>               | BSU11860    | + | + | + | - | + | + | - | - | - | - | 0 | Putative acetyl esterase Yjch; RNA ligase/cyclic nucleotide phosphodiesterase                           | -             |
| <i>sspOP</i>                | BSU17990    | + | + | + | + | - | - | - | - | - | + | - | Small, acid-soluble spore protein                                                                       | -             |
| <i>oppABCDF</i>             | BSU11430    | + | + | + | + | + | - | + | + | + | 0 | 0 | Oligopeptide ABC transporter                                                                            | -             |
| <i>dat</i>                  | BPUM_2473   | 0 | 0 | + | + | + | - | + | 0 | 0 | 0 | 0 | Branched-chain amino acid aminotransferase                                                              | -             |
| <i>gatCAB</i>               | BSU06670    | + | + | + | + | - | - | - | - | - | - | - | Aspartyl-tRNA(Asn) amidotransferase                                                                     | -             |
| <i>amhX</i>                 | BSU03010    | + | + | 0 | + | 0 | - | + | 0 | 0 | - | 0 | Amidohydrolase amhX                                                                                     | -             |
| <i>ilvD</i>                 | BSU21870    | + | + | + | + | - | - | - | - | - | 0 | - | Dihydroxy-acid dehydratase                                                                              | exp. 12618455 |
| <i>hom-thrCB</i>            | BSU32260    | + | + | - | + | + | - | - | - | - | - | - | Threonine biosynthesis                                                                                  | -             |
| <i>ackA</i>                 | BSU29470    | + | + | + | + | - | - | - | - | - | 0 | - | Acetate kinase                                                                                          | exp. 16995897 |
| <i>spoIIQ</i>               | BSU36550    | + | + | + | + | - | - | - | - | 0 | - | - | Stage II sporulation protein related to metalloproteases (SpoIIQ)                                       | -             |
| <i>hpr</i>                  | BSU09990    | + | - | + | - | + | - | - | + | - | 0 | 0 | Transcriptional repressor of sporulation and extracellular protein, MarR family                         | -             |
| <i>ilvBHC-leuABCD</i>       | BSU28310    | + | + | - | - | - | - | - | - | - | + | - | Leucine, isoleucine and valine biosynthesis                                                             | exp. 15228537 |
| <i>citB</i>                 | BSU18000    | + | + | + | + | - | - | - | - | - | - | - | Aconitate hydratase @ 2-methylisocitrate dehydratase                                                    | exp. 12591885 |
| <i>fadNAE</i>               | BSU32840    | - | + | - | + | - | - | + | + | - | - | - | Enoyl-CoA hydratase [isoleucine degradation] / 3-hydroxyacyl-CoA dehydratase                            | -             |
| <i>spoVS</i>                | BSU16980    | + | + | - | - | + | - | + | - | - | - | - | Stage V sporulation protein required for dehydration of the spore coat                                  | -             |
| <i>yoyD-yodF</i>            | BSU19579    | + | + | + | + | 0 | 0 | 0 | 0 | 0 | 0 | 0 | Hypothetical protein; SSS family solute:sodium (Na+) symporter                                          | -             |
| <i>kapD</i>                 | BSU31470    | + | + | - | + | 0 | - | + | 0 | 0 | 0 | 0 | KapD, inhibitor of KinA pathway to sporulation                                                          | -             |

|                                  |           |   |   |   |   |   |   |   |   |   |   |   |                                                                      |               |
|----------------------------------|-----------|---|---|---|---|---|---|---|---|---|---|---|----------------------------------------------------------------------|---------------|
| <i>spoVG</i>                     | BSU00490  | + | - | - | - | - | + | + | - | - | - | - | Stage V sporulation protein G required for spore cortex synthesis    | -             |
| <i>opuBA-BB-BC-BB</i>            | BSU33730  | + | + | 0 | 0 | 0 | 0 | 0 | 0 | 0 | 0 | 0 | Choline ABC transport system                                         | -             |
| <i>opuCA-CB-CC-CD</i>            | BSU33830  | + | + | - | + | 0 | 0 | 0 | 0 | - | 0 | - | Osmotically activated L-carnitine/choline ABC transporter,           | -             |
| <i>kinE-ogt</i>                  | BSU13530  | + | + | - | - | + | - | 0 | 0 | 0 | 0 | 0 | Sporulation kinase E; Methylated-DNA--protein-cysteine methyltrans   | -             |
| <i>yaaC</i>                      | BSU00080  | - | - | + | + | - | - | + | - | - | - | 0 | Conserved hypothetical protein                                       | -             |
| <i>cueR</i>                      | BSU09560  | + | - | + | + | - | 0 | 0 | 0 | 0 | 0 | - | Transcriptional regulator, MerR family                               | -             |
| <i>yhdT</i>                      | BSU09590  | + | - | + | + | 0 | 0 | 0 | 0 | 0 | 0 | 0 | Hemolysins and related proteins containing CBS domains               | -             |
| <i>yocR</i>                      | BSU19340  | + | + | 0 | + | 0 | 0 | 0 | - | 0 | 0 | 0 | Putative sodium-dependent transporter                                | -             |
| <i>BH2374-73</i>                 | BH2374    | 0 | 0 | 0 | 0 | + | - | + | + | 0 | 0 | - | 2-oxoglutarate oxidoreductase, alpha subunit; 2-oxoglutarate oxidore | -             |
| <i>nupNOPQ</i>                   | BSU31540  | + | + | + | - | - | - | - | 0 | - | - | - | Guanosine ABC transport system                                       | exp. 21926227 |
| <i>yzkI-suhB</i>                 | BSU14660  | - | - | - | - | + | - | + | - | - | - | + | Hypothetical protein; Inositol-1-monophosphatase                     | -             |
| <i>ybgE</i>                      | BSU02390  | + | + | + | - | 0 | 0 | 0 | - | - | - | - | Branched-chain amino acid aminotransferase                           | exp. 12618455 |
| <i>murQR-ybbF-amiE-nagZ-ybbC</i> | BSU01700  | + | - | + | + | 0 | 0 | - | - | - | - | 0 | Muropeptide rescue pathway                                           | -             |
| <i>sshCAB</i>                    | BSU28450  | - | + | + | + | - | - | - | - | - | - | - | Succinate dehydrogenase                                              | -             |
| <i>yslB</i>                      | BSU28460  | - | + | + | + | - | - | - | - | - | - | - | Predicted hydrocarbon binding protein (V4R domain)                   | -             |
| <i>ytkC</i>                      | BSU30640  | + | + | - | + | 0 | 0 | 0 | 0 | 0 | 0 | 0 | Hypothetical membrane protein                                        | -             |
| <i>ndk</i>                       | BSU22730  | - | - | - | + | - | - | - | - | - | + | - | Nucleoside diphosphate kinase                                        | -             |
| <i>rocR</i>                      | BSU40350  | + | - | - | + | 0 | 0 | + | - | - | 0 | 0 | Transcriptional activator of arginine utilization, Fis family        | -             |
| <i>lcfA</i>                      | BSU28560  | - | - | - | - | + | - | + | - | - | + | - | Long-chain-fatty-acid--CoA ligase                                    | -             |
| <i>ylmA</i>                      | BSU15340  | + | + | - | + | - | - | 0 | 0 | 0 | 0 | - | Putative ABC transporter, ATP-binding protein                        | exp. 18083814 |
| <i>ybxG</i>                      | BSU02060  | + | + | - | + | 0 | 0 | - | 0 | 0 | 0 | 0 | Amino acid permease                                                  | -             |
| <i>hutPHUIGM</i>                 | BSU39340  | + | + | 0 | 0 | 0 | - | + | - | - | 0 | 0 | Histidine utilization                                                | exp. 8682780  |
| <i>iscS-thil</i>                 | BSU29590  | + | + | - | + | - | - | - | - | - | - | - | Thiamine biosynthesis                                                | -             |
| <i>bacABCDE-mtnE</i>             | BSU37740  | + | + | - | - | - | - | 0 | 0 | - | - | - | Bacilysin biosynthesis                                               | exp. 21709425 |
| <i>gabP</i>                      | BSU06310  | + | - | + | 0 | 0 | 0 | + | 0 | 0 | 0 | 0 | Gamma-aminobutyrate (GABA) permease                                  | exp. 8951816  |
| <i>braB</i>                      | BSU29600  | + | + | + | 0 | 0 | 0 | 0 | 0 | 0 | 0 | 0 | Branched-chain amino acid transport system carrier protein           | -             |
| <i>metE2</i>                     | BSU38950  | + | + | + | - | 0 | 0 | 0 | 0 | 0 | 0 | 0 | Methionine synthase II (cobalamin-independent)                       | -             |
| <i>citR</i>                      | BSU09430  | + | + | 0 | + | 0 | 0 | 0 | 0 | - | 0 | 0 | Transcriptional regulator of citrate synthase, LysR family           | -             |
| <i>metIC</i>                     | BSU11870  | + | - | + | - | - | - | - | - | - | 0 | - | Cystathionine gamma-synthase; Cystathionine beta-lyase               | -             |
| <i>metA</i>                      | BSU21910  | - | - | - | - | + | - | - | - | - | + | - | Homoserine O-succinyltransferase                                     | -             |
| <i>Aflv_2134</i>                 | Aflv_2134 | 0 | 0 | 0 | 0 | + | - | + | 0 | 0 | 0 | 0 | Uncharacterized membrane protein                                     | -             |
| <i>yppF</i>                      | BSU22260  | - | - | 0 | - | + | - | + | 0 | 0 | 0 | 0 | Hypothetical protein                                                 | -             |
| <i>citZ-icd-mdh</i>              | BSU29140  | + | + | + | + | + | + | - | - | - | + | - | Citrate synthase (si); Isocitrate dehydrogenase [NADP]; Malate dehy  | -             |
| <i>glnQHMP</i>                   | BSU27430  | + | + | - | 0 | 0 | - | - | 0 | - | 0 | - | Glutamine ABC transporter                                            | -             |
| <i>ycgA</i>                      | BSU03020  | - | + | + | 0 | 0 | 0 | 0 | 0 | 0 | - | 0 | Putative integral inner membrane protein                             | -             |
| <i>glnB-amt</i>                  | BLi01176  | 0 | 0 | 0 | + | 0 | 0 | 0 | 0 | 0 | + | 0 | Nitrogen regulatory protein P-II; Ammonium transporter               | -             |
| <i>ABC3160</i>                   | ABC3160   | 0 | 0 | 0 | + | 0 | 0 | 0 | 0 | + | 0 | 0 | Hypothetical protein                                                 | -             |
| <i>yjcl</i>                      | BSU11900  | + | 0 | 0 | + | 0 | 0 | 0 | 0 | 0 | 0 | 0 | Putative integral membrane protein                                   | -             |

|                         |            |   |   |   |   |   |   |   |   |   |   |   |                                                                         |               |
|-------------------------|------------|---|---|---|---|---|---|---|---|---|---|---|-------------------------------------------------------------------------|---------------|
| <i>yjnA</i>             | BSU12400   | + | + | 0 | 0 | 0 | 0 | 0 | 0 | 0 | 0 | 0 | Putative integral membrane protein                                      |               |
| <i>glnRA</i>            | BSU17450   | - | + | - | - | + | - | - | - | - | - | - | Transcriptional regulator of nitrogen excess response, MerR family; G   |               |
| <i>aziCD</i>            | RBAM_26776 | 0 | - | - | - | + | + | - | - | - | - | - | Branched-chain amino acid transport                                     |               |
| <i>pta</i>              | BSU37660   | - | - | - | - | - | - | - | + | + | - | 0 | Phosphate acetyltransferase                                             |               |
| <i>ureABC</i>           | BSU36660   | + | + | 0 | 0 | 0 | - | 0 | - | 0 | 0 | - | Urease                                                                  | exp. 9287005  |
| <i>yhaA</i>             | BSU10070   | + | - | - | + | - | 0 | 0 | 0 | 0 | - | 0 | N-acyl-L-amino acid amidohydrolase                                      |               |
| <i>appDFABC</i>         | Aflv_0356  | 0 | 0 | - | - | + | 0 | 0 | - | - | + | 0 | Oligopeptide ABC transporter                                            |               |
| <i>glnHPQ</i>           | Aflv_2792  | 0 | 0 | 0 | 0 | + | + | 0 | 0 | - | + | 0 | Glutamine ABC transporter                                               |               |
| <i>putBCPR</i>          | BSU03200   | + | + | - | + | 0 | + | + | - | - | - | 0 | Proline utilization                                                     | exp. 21840319 |
| <i>phoB</i>             | BSU09410   | + | - | - | 0 | 0 | 0 | + | 0 | 0 | 0 | 0 | Alkaline phosphatase                                                    |               |
| <i>nasDEF</i>           | BSU03300   | + | + | - | - | 0 | - | - | - | - | 0 | - | Nitrite reductase                                                       |               |
| <i>yhdGH</i>            | BSU09460   | + | + | 0 | - | 0 | 0 | 0 | 0 | - | 0 | 0 | Amino acid transporter                                                  | exp. 21097623 |
| <i>friBO-yurNM-friD</i> | BSU32610   | + | + | 0 | 0 | 0 | 0 | 0 | 0 | 0 | 0 | 0 | Fructoselysine utilization                                              |               |
| <i>gamR</i>             | BSU02370   | + | 0 | 0 | - | 0 | 0 | 0 | - | + | - | 0 | Predicted transcriptional regulator of glucosamine utilization, GntR fa |               |
| <i>mcpC</i>             | BSU13950   | + | - | - | - | - | - | - | + | 0 | 0 | 0 | Methyl-accepting chemotaxis protein McpC                                |               |
| <i>glnA2</i>            | Aflv_1403  | 0 | 0 | 0 | 0 | + | - | 0 | - | + | 0 | 0 | Glutamine synthetase type I                                             |               |
| <i>pelB</i>             | BPUM_3515  | 0 | 0 | - | + | 0 | 0 | 0 | + | - | 0 | 0 | Pectate lyase precursor                                                 |               |
| <i>ywcBA</i>            | BSU38230   | - | 0 | - | - | 0 | + | + | 0 | - | - | 0 | Hypothetical Membrane Spanning Protein; SSS family solute:sodium        |               |
| <i>oppA2</i>            | BH0031     | 0 | 0 | 0 | 0 | 0 | 0 | 0 | + | - | + | 0 | Oligopeptide ABC transporter, periplasmic oligopeptide-binding prote    |               |
| <i>serC</i>             | BSU10020   | - | + | - | - | + | - | - | - | - | 0 | - | Phosphoserine aminotransferase                                          |               |
| <i>alaRT</i>            | BSU31410   | - | - | - | + | + | - | - | - | - | 0 | - | Transcriptional regulator of alanine metabolism, Lrp/AsnC family; Asp   |               |
| <i>yuaE</i>             | BSU31030   | + | + | - | - | 0 | 0 | 0 | 0 | 0 | 0 | 0 | Hypothetical protein                                                    |               |
| <i>yuaFG</i>            | BSU31020   | + | + | - | 0 | 0 | - | - | - | - | - | - | Hypothetical membrane protein                                           |               |
| <i>yfmB</i>             | BSU07530   | - | - | + | + | 0 | 0 | 0 | 0 | 0 | 0 | 0 | Hypothetical protein                                                    |               |
| <i>rocDEF</i>           | BSU40340   | + | - | - | + | - | - | - | - | - | - | - | Arginine utilization                                                    |               |
| <i>glpQ</i>             | Bli04156   | 0 | 0 | 0 | + | 0 | 0 | 0 | - | 0 | + | - | Glycerophosphoryl diester phosphodiesterase, periplasmic                |               |
| <i>amyS</i>             | Bli00656   | 0 | 0 | 0 | + | 0 | 0 | + | 0 | 0 | 0 | 0 | Cytoplasmic alpha-amylase                                               |               |
| <i>cotR</i>             | BSU34530   | + | + | 0 | 0 | 0 | 0 | 0 | 0 | 0 | 0 | 0 | Putative sporulation hydrolase                                          |               |
| <i>ispA</i>             | BSU13190   | + | - | + | - | 0 | 0 | 0 | 0 | 0 | 0 | 0 | S8 family serine protease precursor                                     |               |
| <i>gltT</i>             | BSU10220   | - | - | + | + | 0 | 0 | 0 | 0 | 0 | 0 | 0 | Proton/sodium-glutamate symport protein                                 |               |
| <i>yqjP</i>             | BSU23790   | - | - | - | - | + | - | + | - | 0 | 0 | 0 | Zinc metallohydrolase, metallo-beta-lactamase family                    |               |
| <i>yusZ</i>             | BSU32980   | + | - | - | + | - | 0 | - | 0 | 0 | 0 | 0 | Oxidoreductase, short-chain dehydrogenase/reductase                     |               |
| <i>gltAB</i>            | BSU18450   | - | - | - | - | - | - | 0 | + | - | + | - | Glutamate synthase [NADPH]                                              |               |
| <i>yhjCB</i>            | BSU10450   | + | + | 0 | 0 | 0 | 0 | - | 0 | 0 | 0 | 0 | Hypothetical protein; Na+/solute symporter                              |               |
| <i>rok</i>              | BSU14240   | + | + | - | - | 0 | 0 | 0 | 0 | 0 | 0 | 0 | ComK repressor                                                          |               |
| <i>adeC</i>             | BSU14520   | + | - | - | - | + | - | 0 | 0 | 0 | 0 | 0 | Adenine deaminase                                                       |               |
| <i>glyP</i>             | BPUM_0735  | 0 | 0 | - | + | 0 | 0 | - | + | - | - | 0 | Sodium/glycine symporter GlyP                                           |               |
| <i>gltP</i>             | BSU02340   | - | + | + | - | 0 | 0 | 0 | 0 | 0 | 0 | 0 | Proton/glutamate symport protein @ Proton/aspartate symport protei      |               |

|                                     |                    |   |   |   |   |   |   |   |   |   |   |   |                                                                       |               |
|-------------------------------------|--------------------|---|---|---|---|---|---|---|---|---|---|---|-----------------------------------------------------------------------|---------------|
| <i>RBAM_038050</i>                  | <i>RBAM_038050</i> | 0 | + | 0 | 0 | 0 | 0 | + | 0 | 0 | 0 | 0 | Acetyltransferase, GNAT family protein                                |               |
| <i>tdh-kbl</i>                      | <i>BSU16990</i>    | - | + | + | - | 0 | 0 | - | - | 0 | - | 0 | L-threonine 3-dehydrogenase; 2-amino-3-ketobutyrate coenzyme A I      |               |
| <i>dppCB-oppDF</i>                  | <i>BH0030</i>      | 0 | 0 | 0 | 0 | 0 | 0 | 0 | + | - | + | 0 | Oligopeptide ABC transporter                                          |               |
| <i>gldA</i>                         | <i>RBAM_00264</i>  | 0 | + | - | - | 0 | 0 | 0 | 0 | - | + | 0 | Glycerol dehydrogenase                                                |               |
| <i>gltZ</i>                         | <i>BLi03198</i>    | 0 | 0 | 0 | + | 0 | 0 | 0 | 0 | 0 | + | 0 | Proton/glutamate symport protein @ Sodium/glutamate symport prot      |               |
| <i>yclF</i>                         | <i>BSU03670</i>    | - | - | + | - | - | + | 0 | 0 | 0 | 0 | 0 | POT family proton (H+)-dependent oligopeptide transporter             |               |
| <i>chi</i>                          | <i>OB0791</i>      | 0 | 0 | 0 | - | 0 | 0 | 0 | + | + | - | - | Chitinase                                                             |               |
| <i>pdaB</i>                         | <i>BSU01570</i>    | - | - | - | + | + | - | - | - | - | - | - | Probable polysaccharide deacetylase                                   |               |
| <i>argGH</i>                        | <i>OB3129</i>      | - | - | - | - | - | + | - | - | - | + | - | Argininosuccinate synthase; Argininosuccinate lyase                   |               |
| <i>slp</i>                          | <i>BSU14620</i>    | + | + | - | - | 0 | 0 | 0 | - | 0 | 0 | 0 | Peptidoglycan-associated protein                                      |               |
| <i>ushA</i>                         | <i>Aflv_2607</i>   | 0 | 0 | 0 | 0 | + | 0 | 0 | - | - | 0 | + | 5'-nucleotidase                                                       |               |
| <i>Pjdr2_3723-17</i>                | <i>Pjdr2_3723</i>  | 0 | 0 | 0 | 0 | 0 | 0 | 0 | 0 | 0 | 0 | + | Oligopeptide ABC transporter                                          |               |
| <i>crnA-Pjdr2_6137-33-wrbA-codA</i> | <i>Pjdr2_6138</i>  | 0 | 0 | 0 | 0 | 0 | 0 | 0 | 0 | + | - | 0 | Creatine degradation                                                  |               |
| <i>odhAB</i>                        | <i>BSU19370</i>    | - | - | - | - | 0 | - | + | + | - | - | - | 2-oxoglutarate dehydrogenase E1 component; 2-oxoglutarate dehyd       |               |
| <b>GutR regulon</b>                 | <b>gutR</b>        | + | + | 0 | 0 | 0 | 0 | 0 | 0 | 0 | 0 | 0 | <b>Sorbitol utilization</b>                                           |               |
| <i>gutBP</i>                        | <i>BSU06150</i>    | + | + | 0 | 0 | 0 | 0 | 0 | 0 | 0 | 0 | 0 | Sorbitol utilization                                                  | exp. 11118449 |
| <b>MalR regulon</b>                 | <b>malR</b>        | + | + | + | + | 0 | 0 | 0 | 0 | 0 | 0 | 0 | <b>Malate utilization</b>                                             |               |
| <i>ywkAB</i>                        | <i>BSU37050</i>    | + | + | + | + | 0 | 0 | 0 | 0 | 0 | 0 | 0 | Malate dehydrogenase; Malate permease                                 | exp. 12949160 |
| <i>maeN</i>                         | <i>BSU31580</i>    | + | 0 | + | + | 0 | 0 | - | 0 | - | 0 | 0 | Malate Na(+) symporter                                                | exp. 12949159 |
| <i>yflS</i>                         | <i>BSU07570</i>    | + | + | 0 | - | 0 | 0 | 0 | 0 | 0 | 0 | 0 | Putative malate transporter                                           | exp. 12949159 |
| <b>YbzH regulon</b>                 | <b>ybzH</b>        | + | + | 0 | + | 0 | 0 | 0 | 0 | + | 0 | 0 | <b>Hypothetical efflux transporter</b>                                |               |
| <i>ybzH</i>                         | <i>BSU01889</i>    | + | + | 0 | + | 0 | 0 | 0 | 0 | + | 0 | 0 | Transcriptional regulator, ArsR family                                |               |
| <i>ybcL</i>                         | <i>BSU01890</i>    | + | + | 0 | + | 0 | 0 | 0 | 0 | + | 0 | 0 | Putative efflux transporter                                           |               |
| <b>PutR regulon</b>                 | <b>putR</b>        | + | + | + | + | 0 | 0 | 0 | 0 | 0 | 0 | 0 | <b>Proline utilization</b>                                            |               |
| <i>putBCPR</i>                      | <i>BSU03200</i>    | + | + | + | + | 0 | 0 | 0 | 0 | 0 | 0 | 0 | Proline utilization                                                   | exp. 21840319 |
| <b>GlnL regulon</b>                 | <b>glnL</b>        | + | + | + | + | 0 | 0 | + | + | 0 | 0 | 0 | <b>Glutamine utilization; Aspartate utilization</b>                   |               |
| <i>glsA1-glnT</i>                   | <i>BSU02430</i>    | + | + | + | + | 0 | 0 | + | + | 0 | - | - | Glutamine utilization                                                 | exp. 15995196 |
| <i>gltT-ansB1</i>                   | <i>BPUM_3019</i>   | 0 | 0 | + | 0 | 0 | 0 | + | 0 | 0 | 0 | 0 | Glutamine utilization                                                 |               |
| <i>gudB</i>                         | <i>BH2718</i>      | 0 | 0 | 0 | 0 | 0 | 0 | 0 | + | 0 | 0 | 0 | Glutamate dehydrogenase                                               |               |
| <b>LiaR regulon</b>                 | <b>liaR</b>        | + | + | + | + | + | + | + | + | + | + | + | <b>Cell wall-active antibiotics stress response</b>                   |               |
| <i>liaIHFSR</i>                     | <i>BSU33130</i>    | + | + | + | + | + | + | + | + | + | + | + | Cell wall-active antibiotics stress response                          | exp. 17660417 |
| <i>liaG</i>                         | <i>BSU33110</i>    | + | + | + | + | 0 | 0 | 0 | + | 0 | 0 | + | Inhibitor of LiaR-dependent gene expression LiaF                      | exp. 17660417 |
| <b>YrkD regulon</b>                 | <b>yrkD</b>        | + | + | + | + | + | + | + | 0 | 0 | + | 0 | <b>Hypothetical substance detoxification pathway</b>                  |               |
| <i>yrkEFHIJ</i>                     | <i>BSU26540</i>    | + | + | + | + | + | + | + | 0 | 0 | + | 0 | Putative sulfur reduction protein; Rhodanese-like domain protein; Zn- |               |
| <i>RBAM_005440</i>                  | <i>RBAM_005440</i> | 0 | + | + | + | + | + | + | 0 | 0 | 0 | 0 | Rhodanese-like domain protein                                         |               |
| <i>ydfQ</i>                         | <i>BLi02789</i>    | 0 | 0 | 0 | + | 0 | 0 | 0 | 0 | 0 | 0 | 0 | Thioredoxin                                                           |               |
| <i>BLi02788-yvqC-hmt2-BLi02785</i>  | <i>BLi02788</i>    | 0 | - | 0 | + | + | + | 0 | 0 | 0 | 0 | 0 | Two-component system; Sulfide-quinone reductase; Rhodanese-like       |               |
| <i>Aflv_1299-1300</i>               | <i>Aflv_1299</i>   | 0 | 0 | 0 | 0 | + | + | + | 0 | 0 | 0 | 0 | CoA-disulfide reductase (EC 1.8.1.14) / Rhodanese domain protein;     |               |



|                                       |                   |   |   |   |   |   |   |   |   |   |   |                                        |                                                                          |                                |  |
|---------------------------------------|-------------------|---|---|---|---|---|---|---|---|---|---|----------------------------------------|--------------------------------------------------------------------------|--------------------------------|--|
| <i>grx</i>                            | GK2075            | 0 | 0 | 0 | 0 | + | + | 0 | 0 | 0 | 0 | 0                                      | 0                                                                        | Predicted glutaredoxin         |  |
| <i>yrkD</i>                           | BSU26550          | + | + | + | + | + | + | + | 0 | 0 | + | 0                                      | Transcriptional regulator, RcnR family                                   |                                |  |
| GK2072                                | GK2072            | 0 | 0 | 0 | 0 | 0 | + | 0 | 0 | 0 | 0 | 0                                      | Rhodanese-like domain protein                                            |                                |  |
| <i>Aflv_1540</i>                      | <i>Aflv_1540</i>  | 0 | 0 | 0 | 0 | + | 0 | 0 | 0 | 0 | 0 | 0                                      | Rhodanese-like domain protein                                            |                                |  |
| <i>Aflv_1298</i>                      | <i>Aflv_1298</i>  | 0 | 0 | 0 | 0 | + | 0 | 0 | 0 | 0 | 0 | 0                                      | Rhodanese-like domain protein                                            |                                |  |
| <b>LytT regulon</b>                   | <b>lytT</b>       | + | + | + | + | 0 | 0 | + | 0 | 0 | 0 | 0                                      | <b>Cell integrity protection</b>                                         |                                |  |
| <i>lrgAB</i>                          | BSU28910          | + | + | + | + | 0 | 0 | + | 0 | 0 | 0 | 0                                      | Inhibits the expression or activity of extracellular murein hydrolases b |                                |  |
| <b>Ywbl regulon</b>                   | <b>ywbl</b>       | + | + | + | + | 0 | 0 | 0 | 0 | 0 | 0 | +                                      | <b>Cell integrity protection</b>                                         |                                |  |
| <i>ywbl</i>                           | BSU38310          | + | + | + | - | - | - | 0 | 0 | - | 0 | Transcriptional regulator, LysR family |                                                                          |                                |  |
| <i>cidA-lrgB</i>                      | BSU38320          | + | + | + | + | 0 | 0 | - | 0 | 0 | 0 | +                                      | Increases the activity of extracellular murein hydrolases possibly by r  |                                |  |
| <b>YvcP regulon</b>                   | <b>yvcP</b>       | + | 0 | 0 | 0 | 0 | 0 | 0 | + | + | 0 | +                                      | <b>Bacitracin resistance</b>                                             |                                |  |
| <i>yvcRS</i>                          | BSU34690          | + | 0 | 0 | 0 | 0 | 0 | 0 | + | + | 0 | +                                      | Putative antibiotics resistance ABC transport system                     | exp. 14651641                  |  |
| <b>YizB regulon</b>                   | <b>yizB</b>       | + | + | + | + | 0 | 0 | + | 0 | 0 | 0 | 0                                      |                                                                          |                                |  |
| <i>yizB-yitQR</i>                     | BSU11079          | + | 0 | 0 | 0 | 0 | 0 | 0 | 0 | 0 | + | 0                                      | Transcription regulator, PadR family; Predicted membrane protein         |                                |  |
| <b>RNA-elements regulons</b>          |                   |   |   |   |   |   |   |   |   |   |   |                                        |                                                                          |                                |  |
| <b>TPP regulon</b>                    | <b>TPP</b>        |   |   |   |   |   |   |   |   |   |   |                                        |                                                                          | <b>Thiamine biosynthesis</b>   |  |
| <i>thiT</i>                           | BSU30990          | + | + | + | + | 0 | 0 | + | + | 0 | + | 0                                      | Substrate-specific component ThiT of thiamin ECF transporter             |                                |  |
| <i>thiC</i>                           | BSU08790          | + | + | + | + | + | + | + | + | 0 | 0 | +                                      | Thiamin biosynthesis protein ThiC                                        |                                |  |
| <i>thiY2-COG0011-thiX2Z2-COG0084</i>  | <i>Pjdr2_3510</i> | 0 | 0 | 0 | 0 | 0 | 0 | + | 0 | 0 | 0 | +                                      | Thiamin ABC transporter; TatD-related deoxyribonuclease, COG008          |                                |  |
| <i>tenAI-thiOSGFD</i>                 | BSU11650          | + | + | + | + | + | + | + | + | + | + | -                                      | 4-amino-5-aminomethyl-2-methylpyrimidine hydrolase TenA; Thiamin         | exp. 12464185                  |  |
| <i>ykoFEDC</i>                        | BSU13240          | + | + | + | + | + | + | 0 | 0 | + | + | 0                                      | Thiamin-regulated ECF transporter for HydroxyMethylPyrimidine            |                                |  |
| <i>ylmB</i>                           | BSU15350          | + | + | 0 | 0 | 0 | - | 0 | + | + | 0 | -                                      | N-formyl-4-amino-5-aminomethyl-2-methylpyrimidine deformylase ( E        |                                |  |
| <b>Cobalamin regulon</b>              | <b>Cobalamin</b>  |   |   |   |   |   |   |   |   |   |   |                                        |                                                                          | <b>Cobalamin biosynthesis</b>  |  |
| <i>btuFCD-pduO</i>                    | BSU33180          | + | - | - | - | + | + | 0 | + | - | 0 | +                                      | Vitamin B12 ABC transporter; Cob(I)alamin adenosyltransferase Pdu        | exp. 14704351                  |  |
| <i>cbiWMNQOHXJCDETLFGAP-cobT-cysG</i> | <i>Aflv_2185</i>  | 0 | 0 | 0 | 0 | + | + | 0 | 0 | 0 | 0 | 0                                      | Cobalt ECF transporter; Cobalamin biosynthesis                           |                                |  |
| <i>cbiB-cobDUSC-X-cbITS</i>           | <i>Aflv_1044</i>  | 0 | 0 | 0 | 0 | + | + | 0 | + | 0 | 0 | +                                      | Cobalamin biosynthesis                                                   |                                |  |
| <i>metE</i>                           | BSU13180          | - | - | + | + | 0 | 0 | + | + | + | 0 | +                                      | 5-methyltetrahydropteroyltriglutamate--homocysteine methyltransfera      |                                |  |
| <i>achX</i>                           | BH0798            | 0 | 0 | 0 | 0 | 0 | 0 | 0 | + | 0 | 0 | 0                                      | Predicted thioesterase                                                   |                                |  |
| <i>nrdAB</i>                          | <i>Aflv_0393</i>  | 0 | 0 | 0 | 0 | + | + | 0 | + | 0 | - | 0                                      | Ribonucleotide reductase of class Ia (aerobic)                           |                                |  |
| <i>Pjdr2_2684-88</i>                  | <i>Pjdr2_2684</i> | 0 | 0 | 0 | 0 | 0 | 0 | 0 | 0 | 0 | 0 | +                                      | S-layer domain protein; Hypothetical protein; B12-regulated ECF tran     |                                |  |
| <b>FMN regulon</b>                    | <b>FMN</b>        |   |   |   |   |   |   |   |   |   |   |                                        |                                                                          | <b>Riboflavin biosynthesis</b> |  |
| <i>ribU</i>                           | BSU23050          | + | + | + | + | 0 | + | + | 0 | 0 | + | 0                                      | Substrate-specific component RibU of riboflavin ECF transporter          | exp. 15808508                  |  |
| <i>impX</i>                           | ABC3060           | 0 | 0 | 0 | 0 | 0 | 0 | 0 | 0 | + | 0 | +                                      | Predicted riboflavin transporter, EamA family                            |                                |  |
| <i>ribDEBAHT</i>                      | BSU23270          | + | + | + | + | + | + | + | + | + | + | +                                      | Riboflavin biosynthesis                                                  | exp. 12464185                  |  |
| <b>Lysine regulon</b>                 | <b>Lysine</b>     |   |   |   |   |   |   |   |   |   |   |                                        |                                                                          | <b>Lysine biosynthesis</b>     |  |
| <i>lysC</i>                           | BSU28470          | + | + | + | + | 0 | 0 | + | + | 0 | 0 | -                                      | Aspartokinase                                                            | exp. 14523230                  |  |
| <i>lysW</i>                           | BH3449            | 0 | 0 | 0 | 0 | 0 | 0 | 0 | + | + | + | 0                                      | Predicted lysine transporter, NhaC family                                |                                |  |
| <i>lysA</i>                           | BSU23380          | - | - | - | - | - | - | - | + | + | - | -                                      | Diaminopimelate decarboxylase                                            |                                |  |

|                              |                |   |   |   |   |   |   |   |   |   |   |   |                                |                                                                       |               |
|------------------------------|----------------|---|---|---|---|---|---|---|---|---|---|---|--------------------------------|-----------------------------------------------------------------------|---------------|
| <i>lysP</i>                  | BC3052         | 0 | 0 | 0 | 0 | 0 | 0 | + | 0 | 0 | 0 | + | Lysine-specific permease       |                                                                       |               |
| <i>yvsH</i>                  | BSU33330       | + | + | + | + | + | + | + | 0 | 0 | 0 | 0 | Putative lysine permease       |                                                                       |               |
| <i>dapA</i>                  | BSU1742        | 0 | 0 | 0 | 0 | 0 | 0 | 0 | + | + | + | 0 | Dihydrodipicolinate synthase   |                                                                       |               |
| <b>SAM regulon</b>           | <b>SAM</b>     |   |   |   |   |   |   |   |   |   |   |   | <b>Methionine biosynthesis</b> |                                                                       |               |
| <i>metNPQ</i>                | BSU32750       | + | + | + | + | + | + | + | + | + | + | + | -                              | Methionine ABC transporter                                            | exp. 14990259 |
| <i>metK</i>                  | BSU30550       | + | + | + | + | + | + | + | + | + | + | + | -                              | S-adenosylmethionine synthetase                                       |               |
| <i>mtnKA</i>                 | BSU13560       | + | + | + | + | + | + | + | 0 | 0 | 0 | 0 | -                              | 5-methylthioribose kinase; Methylthioribose-1-phosphate isomerase     | exp. 10094622 |
| <i>rbsBAC</i>                | BPUM_3498      | 0 | 0 | + | 0 | + | + | + | 0 | 0 | 0 | 0 | -                              | Ribose ABC transport system                                           |               |
| <i>mtnWXBD</i>               | BSU13590       | + | + | + | + | + | + | + | 0 | 0 | 0 | 0 | -                              | 2,3-diketo-5-methylthiopentyl-1-phosphate enolase; 2-hydroxy-3-keto   | exp. 16091040 |
| <i>metQ2N2P2</i>             | BC0198         | 0 | 0 | 0 | 0 | 0 | 0 | + | 0 | 0 | + | 0 | 0                              | Methionine ABC transporter                                            |               |
| <i>metN1P1Q1</i>             | ABC0876        | 0 | 0 | 0 | + | 0 | 0 | 0 | 0 | + | + | 0 | 0                              | Methionine ABC transporter                                            |               |
| <i>OB3328</i>                | OB3328         | 0 | - | - | - | 0 | 0 | 0 | 0 | + | + | 0 | 0                              | Predicted alcohol dehydrogenase, iron-type                            |               |
| <i>metN3P3Q3</i>             | Bli00972       | - | - | 0 | + | 0 | 0 | + | 0 | + | + | 0 | 0                              | Methionine ABC transporter                                            |               |
| <i>acy</i>                   | BC3176         | 0 | 0 | 0 | 0 | 0 | 0 | + | 0 | + | + | 0 | 0                              | N-acyl-L-amino acid amidohydrolase                                    |               |
| <i>metE</i>                  | BSU13180       | + | + | - | - | 0 | 0 | - | - | + | 0 | - | -                              | 5-methyltetrahydropteroyltriglutamate--homocysteine methyltransferase |               |
| <i>BH0835</i>                | BH0835         | 0 | 0 | 0 | 0 | 0 | 0 | 0 | + | 0 | + | 0 | 0                              | Uncharacterized protein                                               |               |
| <i>OB3078</i>                | OB3078         | 0 | 0 | 0 | 0 | 0 | 0 | 0 | 0 | 0 | + | 0 | 0                              | Predicted sulfonate monooxygenase                                     |               |
| <i>yoaDCB</i>                | BSU18560       | + | + | 0 | 0 | 0 | 0 | 0 | 0 | 0 | 0 | 0 | 0                              | Hydroxypyruvate reductase; Sugar kinase similar to xylulokinase, FG   | exp. 18039762 |
| <i>metY2</i>                 | OB2640         | 0 | 0 | 0 | 0 | 0 | 0 | 0 | 0 | 0 | + | 0 | 0                              | O-acetylhomoserine sulfhydrylase / O-succinylhomoserine sulfhydrylase |               |
| <i>oppBCDFA</i>              | BC0207         | 0 | 0 | 0 | 0 | 0 | 0 | + | 0 | 0 | 0 | 0 | 0                              | Oligopeptide transport                                                |               |
| <i>BC0395</i>                | BC0395         | 0 | 0 | 0 | 0 | 0 | 0 | + | 0 | 0 | 0 | 0 | 0                              | Putative formamidase                                                  |               |
| <i>bhmT</i>                  | OB0691         | 0 | 0 | 0 | 0 | 0 | 0 | 0 | 0 | 0 | + | 0 | 0                              | Betaine--homocysteine S-methyltransferase                             |               |
| <i>oppA1</i>                 | BC0216         | 0 | 0 | 0 | 0 | 0 | 0 | + | 0 | 0 | 0 | 0 | 0                              | Oligopeptide ABC transporter, periplasmic oligopeptide-binding prote  |               |
| <i>metY</i>                  | Aflv_2473      | 0 | 0 | - | 0 | - | - | 0 | - | - | + | - | -                              | O-acetylhomoserine sulfhydrylase / O-succinylhomoserine sulfhydrylase |               |
| <i>ssuE</i>                  | OB3079         | 0 | 0 | 0 | 0 | 0 | 0 | 0 | - | - | + | - | -                              | FMN reductase                                                         |               |
| <i>metT</i>                  | BC1434         | 0 | - | 0 | - | 0 | 0 | + | 0 | 0 | 0 | 0 | 0                              | Methionine transporter MetT                                           |               |
| <i>mtsA</i>                  | BC2624         | 0 | 0 | 0 | 0 | 0 | 0 | + | 0 | 0 | 0 | 0 | 0                              | Substrate-specific component MtsA of methionine-regulated ECF tra     |               |
| <i>OB2779-soxA</i>           | OB2779         | 0 | 0 | 0 | 0 | 0 | 0 | 0 | 0 | 0 | + | 0 | 0                              | Possible carboxymuconolactone decarboxylase family protein; Diben     |               |
| <i>ywbC</i>                  | BSU38370       | - | - | - | - | 0 | + | - | - | - | 0 | - | -                              | Lactoylglutathione lyase and related lyases                           |               |
| <i>cysHP-sat-cysCG-sirBC</i> | BSU15570       | + | + | + | + | - | + | + | - | - | - | - | -                              | Reduction of sulfate to sulfite                                       | exp. 19779461 |
| <i>metE3</i>                 | BSU38960       | + | 0 | 0 | 0 | 0 | 0 | 0 | 0 | 0 | 0 | 0 | 0                              | Putative methionine synthase II (cobalamin-independent)               | exp. 18039762 |
| <i>metE2</i>                 | BSU38950       | + | + | + | + | 0 | 0 | 0 | 0 | + | + | 0 | 0                              | Putative methionine synthase II (cobalamin-independent)               | exp. 18039762 |
| <i>metIC</i>                 | BSU11870       | + | + | + | + | + | + | + | + | + | 0 | + | +                              | Cystathionine gamma-synthase; Cystathionine beta-lyase                | exp. 11832514 |
| <i>metF</i>                  | BSU11010       | + | + | + | + | + | + | + | + | + | + | 0 | 0                              | 5,10-methylenetetrahydrofolate reductase / Homolog of homocystein     | exp. 16091040 |
| <i>metH</i>                  | Bli01192       | 0 | 0 | + | + | + | + | + | + | + | + | 0 | -                              | 5-methyltetrahydrofolate--homocysteine methyltransferase              |               |
| <b>Glycine regulon</b>       | <b>Glycine</b> |   |   |   |   |   |   |   |   |   |   |   | <b>Glycine metabolism</b>      |                                                                       |               |
| <i>gcvTP1P2</i>              | BSU24570       | + | + | + | + | + | + | - | + | + | + | 0 | 0                              | Glycine cleavage system                                               | exp. 15472076 |
| <i>glyP</i>                  | BC2317         | 0 | 0 | - | - | 0 | 0 | + | - | - | - | 0 | 0                              | Sodium/glycine symporter GlyP                                         |               |



|                            |                    |                       |                                                                  |
|----------------------------|--------------------|-----------------------|------------------------------------------------------------------|
| <i>ylbH-coaD</i>           | BSU15010           | + + + + + + + + - + + | Ribosomal RNA small subunit methyltransferase D; Phosphopanteth  |
| <b>yybP-ykoY regulon</b>   | <b>yybP-ykoY</b>   |                       |                                                                  |
| <i>ykoY</i>                | BSU13440           | + + + + + + + + + + 0 | Membrane protein TerC, possibly involved in tellurium resistance |
| <i>BC0827-ykoX</i>         | BC0827             | - - - - 0 + + 0 0 0 0 | Hypothetical protein                                             |
| <i>yybP</i>                | BSU40560           | + 0 + + 0 0 - 0 0 0 - | Putative secreted protein                                        |
| <i>yrzF</i>                | ABC3139            | 0 0 - - 0 0 0 0 + + 0 | Predicted Ser/Thr protein kinase                                 |
| <b>L10_leader regulon</b>  | <b>L10_leader</b>  |                       | <b>Ribosome biogenesis</b>                                       |
| <i>rplJL</i>               | BSU01040           | + + + + + + + + + +   | Ribosomal proteins                                               |
| <b>L13_leader regulon</b>  | <b>L13_leader</b>  |                       | <b>Ribosome biogenesis</b>                                       |
| <i>rplM-rpsI</i>           | BSU01490           | + + + + + + + - - + - | Ribosomal proteins                                               |
| <b>L19_leader regulon</b>  | <b>L19_leader</b>  |                       | <b>Ribosome biogenesis</b>                                       |
| <i>rplS</i>                | BSU16040           | + + + + + + + + + -   | Ribosomal proteins                                               |
| <b>L20_leader regulon</b>  | <b>L20_leader</b>  |                       | <b>Ribosome biogenesis</b>                                       |
| <i>infC-rpmI-rplT</i>      | BSU28870           | + + - + + - + + + + + | Ribosomal proteins                                               |
| <b>L21_leader regulon</b>  | <b>L21_leader</b>  |                       | <b>Ribosome biogenesis</b>                                       |
| <i>rpl-ysxB-rpmA</i>       | BSU27960           | + + + + + + + + + +   | Ribosomal proteins                                               |
| <b>T-box (Ala) regulon</b> | <b>T-box (Ala)</b> |                       | <b>Amino acid metabolism</b>                                     |
| <i>alaS</i>                | BSU27410           | + + + + + + + + + -   | Alanyl-tRNA synthetase                                           |
| <b>T-box (Asn) regulon</b> | <b>T-box (Asn)</b> |                       | <b>Amino acid metabolism</b>                                     |
| <i>hisS-aspS</i>           | BSU27560           | + + - + + - - + + - - | Histidyl-tRNA synthetase; Aspartyl-tRNA synthetase               |
| <i>asnA</i>                | BC1746             | 0 0 0 0 0 0 + 0 0 0 0 | Aspartate--ammonia ligase                                        |
| <i>asnS2</i>               | BC4559             | 0 0 0 0 0 0 + 0 0 0 0 | Asparaginyl-tRNA synthetase                                      |
| <b>T-box (Cys) regulon</b> | <b>T-box (Cys)</b> |                       | <b>Amino acid metabolism</b>                                     |
| <i>cysES</i>               | BSU00930           | + + + + + + + + + +   | Serine acetyltransferase; Cysteiny-tRNA synthetase;              |
| <b>T-box (Gly) regulon</b> | <b>T-box (Gly)</b> |                       | <b>Amino acid metabolism</b>                                     |
| <i>glyQS</i>               | BSU25270           | + + + + 0 0 0 + - + + | Glycyl-tRNA synthetase                                           |
| <i>glyS</i>                | Aflv_2771          | 0 0 0 0 + + 0 0 0 0 0 | Glycyl-tRNA synthetase                                           |
| <b>T-box (Ile) regulon</b> | <b>T-box (Ile)</b> |                       | <b>Amino acid metabolism</b>                                     |
| <i>ileS</i>                | BSU15430           | + + + + + + + + + + 0 | Isoleucyl-tRNA synthetase                                        |
| <i>ileS2</i>               | BC2164             | 0 0 0 0 0 0 + 0 0 + - | Isoleucyl-tRNA synthetase                                        |
| <i>ilvBHC-leuABCD-ilvA</i> | BSU28310           | - - - - - + - - + -   | Branched-chain amino acid biosynthesis                           |
| <i>brnQ</i>                | BC1441             | 0 0 0 0 0 0 + 0 0 0 0 | Branched-chain amino acid transport                              |
| <i>Pjdr2_4149</i>          | Pjdr2_4149         | 0 0 0 0 0 0 0 0 0 0 + | GCN5-related N-acetyltransferase                                 |
| <b>T-box (Leu) regulon</b> | <b>T-box (Leu)</b> |                       | <b>Amino acid metabolism</b>                                     |
| <i>leuS</i>                | BSU30320           | + + + + + + + + + +   | Leucyl-tRNA synthetase                                           |
| <i>ilvBHC-leuABCD</i>      | BSU28310           | + + + + + + - + + - + | Branched-chain amino acid biosynthesis                           |
| <i>yvbW</i>                | BSU34010           | + + + + 0 0 0 0 0 0 0 | Amino acid permease                                              |
| <i>yuaI-OB1272</i>         | OB1271             | - 0 - - 0 - - - - + - | Acetyltransferase, GNAT family; Predicted acetyltransferase      |

exp. 15890195

exp. 8606198

|                            |                    |                         |                                                                     |               |
|----------------------------|--------------------|-------------------------|---------------------------------------------------------------------|---------------|
| <i>yocR</i>                | BC2170             | 0 0 0 0 0 0 0 + 0 0 0 0 | Sodium-dependent leucine transporter                                |               |
| <b>T-box (Phe) regulon</b> | <b>T-box (Phe)</b> |                         | <b>Amino acid metabolism</b>                                        |               |
| <i>pheST</i>               | BSU28640           | + + + + + + + + + + +   | Phenylalanyl-tRNA synthetase                                        |               |
| <b>T-box (Pro) regulon</b> | <b>T-box (Pro)</b> |                         | <b>Amino acid metabolism</b>                                        |               |
| <i>proI</i>                | BSU23800           | + + + + + + - + + + +   | Pyrroline-5-carboxylate reductase                                   | exp. 21233158 |
| <i>proBA</i>               | BSU13120           | + + + + + + 0 + + + +   | Glutamate 5-kinase; Gamma-glutamyl phosphate reductase              | exp. 21233158 |
| <i>proS2</i>               | BPUM_0197          | 0 0 + 0 0 0 + 0 0 + -   | Prolyl-tRNA synthetase                                              |               |
| <i>proS</i>                | BSU16570           | - - - - - - - - 0 +     | Prolyl-tRNA synthetase                                              |               |
| <b>T-box (Ser) regulon</b> | <b>T-box (Ser)</b> |                         | <b>Amino acid metabolism</b>                                        |               |
| <i>serS</i>                | BSU00130           | + + + + + + + + - + -   | Seryl-tRNA synthetase                                               |               |
| <i>serA</i>                | BSU23070           | - - - - - 0 + + - -     | D-3-phosphoglycerate dehydrogenase                                  |               |
| <i>serS2</i>               | ABC1428            | 0 0 0 0 0 0 0 0 + 0 +   | Seryl-tRNA synthetase                                               |               |
| <b>T-box (Thr) regulon</b> | <b>T-box (Thr)</b> |                         | <b>Amino acid metabolism</b>                                        |               |
| <i>thrS</i>                | BSU28950           | + + + + + + + + + + +   | Threonyl-tRNA synthetase                                            | exp. 9826762  |
| <i>thrZ</i>                | BSU37560           | + 0 + + 0 0 + 0 + 0 +   | Threonyl-tRNA synthetase                                            | exp. 8288542  |
| <i>hom-thrCB</i>           | BSU32260           | - - - - - + - - - -     | Threonine biosynthesis                                              |               |
| <i>ykbA</i>                | BSU12860           | - - - - 0 + 0 0 0 0     | Amino acid transporter                                              |               |
| <i>brnQ</i>                | BC4550             | 0 0 0 0 0 0 + 0 0 0 0   | Threonine transporter                                               |               |
| <b>T-box (Trp) regulon</b> | <b>T-box (Trp)</b> |                         | <b>Amino acid metabolism</b>                                        |               |
| <i>trpS</i>                | BSU11420           | + + + + + + + + + + +   | Tryptophanyl-tRNA synthetase                                        |               |
| <i>trpEGDCFBA</i>          | BC1232             | - - - - - + - - + -     | Tryptophan biosynthesis                                             |               |
| <i>rtpA-ycbK</i>           | BSU02530           | + 0 0 + 0 0 0 0 0 0     | Anti-TRAP regulator; Permeases of the drug/metabolite transporter ( | exp. 10706627 |
| <i>yhdH</i>                | BC1430             | 0 0 0 0 0 0 + 0 0 0 0   | Sodium-dependent tryptophan transporter                             |               |
| <b>T-box (Tyr) regulon</b> | <b>T-box (Tyr)</b> |                         | <b>Amino acid metabolism</b>                                        |               |
| <i>tyrS</i>                | BSU29670           | + + + + + + + 0 0 + +   | Tyrosyl-tRNA synthetase                                             | exp. 1735721  |
| <i>tyrZ</i>                | BSU38460           | + 0 0 + 0 0 0 + + 0 0   | Tyrosyl-tRNA synthetase                                             |               |
| <i>aroF-hisC-tyrA-aroE</i> | BC2941             | - - - - - + - - - -     | Tyrosine biosynthesis                                               |               |
| <i>phhA-phs</i>            | BC4352             | 0 0 0 0 0 0 + 0 0 0 0   | Phenylalanine-4-hydroxylase; Pterin-4-alpha-carbinolamine dehydrat  |               |
| <i>aroA</i>                | BC2942             | 0 0 0 0 0 0 + 0 0 0 0   | Chorismate mutase I / 2-keto-3-deoxy-D-arabino-heptulosonate-7-ph   |               |
| <i>tyrT</i>                | BC4121             | 0 0 0 0 0 0 + 0 0 + 0   | Predicted tyrosine transporter, NhaC family                         |               |
| <b>T-box (Val) regulon</b> | <b>T-box (Val)</b> |                         | <b>Amino acid metabolism</b>                                        |               |
| <i>valS</i>                | BSU28090           | + + + + + + + + + + 0   | Valyl-tRNA synthetase                                               | exp. 9098041  |

When the gene is present in the genome, the background colors denote the presence (green, '+') or absence (red, '-') of a TFBS in its upstream region; empty crossings ('0') denote the absence of an orthologous gene in the genome.
