# Supplementary material
Source: PubMed Central journal article supplement (PMC3676070)
Supplement: JB.00140-13_zjb999092590so5.pdf [file JB.00140-13_zjb999092590so5.pdf]

**Table S4. Functional properties of reconstructed RNA regulons in *B. subtilis* and related Bacillales.**

| RNA element       | <i>Bacillus subtilis</i> sstr. 168 | <i>Bacillus amyloliquefaciens</i> FZB42 | <i>Bacillus pumilus</i> SAFR-032 | <i>Bacillus licheniformis</i> DSM 13 | <i>Anoxybacillus flavithermus</i> WK1 | <i>Geobacillus kaustophilus</i> HTA426 | <i>Bacillus cereus</i> ATCC 14579 | <i>Bacillus halodurans</i> C-125 | <i>Bacillus clausii</i> KSM-K16 | <i>Oceanobacillus iheyensis</i> HTE831 | <i>Paenibacillus</i> sp. JDR-2 | Functional role                       | Effector                   | Effector Evidence (PMID) |
|-------------------|------------------------------------|-----------------------------------------|----------------------------------|--------------------------------------|---------------------------------------|----------------------------------------|-----------------------------------|----------------------------------|---------------------------------|----------------------------------------|--------------------------------|---------------------------------------|----------------------------|--------------------------|
| <b>Cobalamin</b>  | 4                                  | 0                                       | 1                                | 1                                    | 35                                    | 34                                     | 1                                 | 16                               | 1                               | 0                                      | 14                             | Cobalamin metabolism                  | adenosylcobalamin          | 17038623                 |
| <b>FMN</b>        | 6                                  | 6                                       | 5                                | 6                                    | 5                                     | 6                                      | 5                                 | 5                                | 4                               | 4                                      | 5                              | Riboflavin biosynthesis               | flavin mononucleotide      | 12456892, 12464185       |
| <b>glmS</b>       | 1                                  | 1                                       | 1                                | 1                                    | 1                                     | 1                                      | 1                                 | 1                                | 1                               | 1                                      | 1                              | Hexosamine metabolism                 | glucosamine-6-phosphate    | 15029187                 |
| <b>Glycine</b>    | 3                                  | 4                                       | 4                                | 3                                    | 3                                     | 3                                      | 1                                 | 3                                | 3                               | 3                                      | 0                              | Glycine cleavage system               | glycine                    | 15472076                 |
| <b>L10_leader</b> | 2                                  | 2                                       | 2                                | 2                                    | 2                                     | 2                                      | 2                                 | 2                                | 2                               | 2                                      | 2                              | Ribosome biogenesis                   |                            |                          |
| <b>L13_leader</b> | 2                                  | 2                                       | 2                                | 2                                    | 2                                     | 2                                      | 2                                 | 0                                | 0                               | 2                                      | 0                              | Ribosome biogenesis                   |                            |                          |
| <b>L19_leader</b> | 1                                  | 1                                       | 1                                | 1                                    | 1                                     | 1                                      | 1                                 | 1                                | 1                               | 1                                      | 0                              | Ribosome biogenesis                   |                            |                          |
| <b>L20_leader</b> | 3                                  | 3                                       | 0                                | 3                                    | 3                                     | 0                                      | 3                                 | 3                                | 3                               | 3                                      | 3                              | Ribosome biogenesis                   |                            |                          |
| <b>L21_leader</b> | 3                                  | 3                                       | 3                                | 3                                    | 3                                     | 3                                      | 3                                 | 3                                | 3                               | 3                                      | 3                              | Ribosome biogenesis                   |                            |                          |
| <b>Lysine</b>     | 2                                  | 2                                       | 2                                | 2                                    | 1                                     | 1                                      | 4                                 | 4                                | 2                               | 2                                      | 1                              | Lysine biosynthesis                   | lysine                     | 14523230                 |
| <b>PreQ1</b>      | 4                                  | 4                                       | 4                                | 4                                    | 3                                     | 4                                      | 5                                 | 4                                | 5                               | 5                                      | 4                              | Nucleoside queuosine biosynthesis     | pre-queuosine <sub>1</sub> | 17384645                 |
| <b>Purine</b>     | 17                                 | 17                                      | 16                               | 16                                   | 16                                    | 14                                     | 20                                | 17                               | 15                              | 16                                     | 17                             | Purine salvage and biosynthesis       | guanine, adenine           | 14718920                 |
| <b>PyrR</b>       | 10                                 | 10                                      | 10                               | 10                                   | 10                                    | 11                                     | 11                                | 10                               | 10                              | 10                                     | 7                              | Pyrimidine biosynthesis and transport | PyrR                       | 12896995                 |
| <b>SAM</b>        | 26                                 | 25                                      | 25                               | 25                                   | 17                                    | 24                                     | 45                                | 10                               | 18                              | 25                                     | 3                              | Methionine and cysteine biosynthesis  | S-Adenosyl methionine      | 16810258, 18205390       |
| <b>T-box(Ala)</b> | 1                                  | 1                                       | 1                                | 1                                    | 1                                     | 1                                      | 1                                 | 1                                | 1                               | 1                                      | 0                              | Ala-specific metabolism               | Ala-tRNA                   | 17384645                 |
| <b>T-box(Asn)</b> | 2                                  | 2                                       | 0                                | 2                                    | 2                                     | 0                                      | 2                                 | 2                                | 2                               | 0                                      | 0                              | Asn-specific metabolism               | Asn-tRNA                   | 12464185                 |
| <b>T-box(Asp)</b> | 2                                  | 2                                       | 2                                | 2                                    | 2                                     | 2                                      | 2                                 | 2                                | 2                               | 3                                      | 2                              | Asp-specific metabolism               | Asp-tRNA                   |                          |
| <b>T-box(Gly)</b> | 2                                  | 2                                       | 2                                | 2                                    | 1                                     | 1                                      | 0                                 | 2                                | 0                               | 2                                      | 2                              | Gly-specific metabolism               | Gly-tRNA                   |                          |
| <b>T-box(Ile)</b> | 1                                  | 1                                       | 1                                | 1                                    | 1                                     | 1                                      | 8                                 | 1                                | 1                               | 10                                     | 1                              | Ile-specific metabolism               | Ile-tRNA                   |                          |
| <b>T-box(Leu)</b> | 9                                  | 9                                       | 10                               | 9                                    | 8                                     | 8                                      | 2                                 | 8                                | 8                               | 3                                      | 7                              | Leu-specific metabolism               | Leu-tRNA                   |                          |
| <b>T-box(Phe)</b> | 2                                  | 2                                       | 2                                | 2                                    | 2                                     | 2                                      | 2                                 | 2                                | 2                               | 2                                      | 2                              | Phe-specific metabolism               | Phe-tRNA                   |                          |
| <b>T-box(Pro)</b> | 3                                  | 3                                       | 4                                | 3                                    | 3                                     | 3                                      | 1                                 | 3                                | 3                               | 4                                      | 4                              | Pro-specific metabolism               | Pro-tRNA                   |                          |
| <b>T-box(Ser)</b> | 1                                  | 1                                       | 1                                | 1                                    | 1                                     | 1                                      | 1                                 | 2                                | 2                               | 1                                      | 1                              | Ser-specific metabolism               | Ser-tRNA                   |                          |

|                   |    |    |    |    |    |    |    |   |    |    |    |                                         |                        |          |
|-------------------|----|----|----|----|----|----|----|---|----|----|----|-----------------------------------------|------------------------|----------|
| <b>T-box(Thr)</b> | 2  | 1  | 2  | 2  | 1  | 1  | 7  | 1 | 2  | 1  | 2  | Thr-specific metabolism                 | Thr-tRNA               |          |
| <b>T-box(Trp)</b> | 3  | 1  | 1  | 3  | 1  | 1  | 9  | 1 | 1  | 8  | 2  | Trp-specific metabolism                 | Trp-tRNA               |          |
| <b>T-box(Tyr)</b> | 2  | 1  | 1  | 2  | 1  | 1  | 10 | 1 | 1  | 2  | 1  | Tyr-specific metabolism                 | Tyr-tRNA               |          |
| <b>T-box(Val)</b> | 1  | 1  | 1  | 1  | 1  | 1  | 1  | 1 | 1  | 1  | 0  | Val-specific metabolism                 | Val-tRNA               |          |
| <b>TPP</b>        | 14 | 18 | 13 | 13 | 13 | 10 | 19 | 8 | 12 | 13 | 10 | Thiamine biosynthesis                   | thiamine pyrophosphate | 17355861 |
| <b>ydaO-yuaA</b>  | 3  | 1  | 2  | 2  | 0  | 6  | 5  | 2 | 0  | 3  | 11 | Cell wall metabolism and osmoprotection | ATP                    | 23086297 |
| <b>ykkC-yxkD</b>  | 3  | 3  | 2  | 3  | 0  | 0  | 0  | 2 | 2  | 2  | 2  | Multidrug resistance                    |                        |          |
| <b>ykoK</b>       | 1  | 1  | 1  | 1  | 0  | 0  | 0  | 5 | 1  | 0  | 0  | Magnesium uptake                        | magnesium              | 15096624 |
| <b>ylbH</b>       | 2  | 2  | 2  | 2  | 2  | 2  | 2  | 2 | 0  | 2  | 2  | Hypothetical                            |                        |          |
| <b>yybP-ykoY</b>  | 2  | 1  | 2  | 2  | 1  | 2  | 3  | 1 | 2  | 2  | 0  | Hypothetical                            |                        |          |

Number of target operons is indicated for each RNA regulon
